# Supplementary material for: Quinoxaline: a new directing group for ortho C–H alkenylation / intramolecular ortho C–H cycloamination under open air leading to bioactive polynuclear N-heteroarenes
Source: Royal Society of Chemistry journal article supplement (doi:10.1039/c5ra14671b), 2015-01-01
Supplement: c5ra14671b1.pdf [file c5ra14671b1.pdf]

## Electronic Supplementary Information

### Quinoxaline: a new directing group for *ortho* C-H alkenylation / intramolecular *ortho* C-H cycloamination under open air leading to bioactive polynuclear *N*-heteroarenes

Rajnikanth Sunke,<sup>a</sup> Vimal Kumar,<sup>b</sup> E. V. Venkat Shivaji Ramarao,<sup>a</sup> Ramudu Bankala,<sup>a</sup> Kishore

V. L. Parsa<sup>a</sup> and Manojit Pal<sup>a,\*</sup>

E-mail: [manojitpal@rediffmail.com](mailto:manojitpal@rediffmail.com)

| <b>Table of content</b>                                                     | <b>Page</b> |
|-----------------------------------------------------------------------------|-------------|
| General Methods                                                             | 2           |
| General Procedure for <b>3a-f</b>                                           | 2-3         |
| Typical Procedures for <b>3g &amp; 5a</b>                                   | 3           |
| Analytical data of <b>5a-5q</b>                                             | 8-18        |
| General procedure for the Ru-catalyzed direct <i>ortho</i> C-H alkenylation | 18          |
| General Procedure for <b>6a-d</b>                                           | 19-20       |
| Analytical data of <b>6a-d</b>                                              | 21-23       |
| References                                                                  | 23          |
| Pharmacology                                                                | 23          |

## Chemistry

**General methods:** Unless stated otherwise, reactions were performed under nitrogen atmosphere using oven dried glassware. Reactions were monitored by thin layer chromatography (TLC) on silica gel plates (60 F254), visualizing with ultraviolet light or iodine spray. Flash chromatography was performed on silica gel (230-400 mesh) using distilled hexane, ethyl acetate.  $^1\text{H}$  NMR and  $^{13}\text{C}$  NMR spectra were recorded in  $\text{CDCl}_3$  or  $\text{DMSO}-d_6$  solution by using 400 or 100 MHz spectrometers, respectively. Proton chemical shifts ( $\delta$ ) are relative to tetramethylsilane (TMS,  $\delta = 0.00$ ) as internal standard and expressed in ppm. Spin multiplicities are given as s (singlet), d (doublet), dd (doublet of doublet), td (triplet of doublet), t (triplet) and m (multiplet) as well as b (broad). Coupling constants ( $J$ ) are given in hertz. MS spectra were obtained on a Agilent 6430 series Triple Quad LC-MS / MS spectrometer. Melting points (mp) were by using Buchi B-540 melting point apparatus and are uncorrected. Chromatographic purity by HPLC (Agilent 1200 series Chem Station software) was determined by using area normalization method and the condition specified in each case: column, mobile phase (range used), flow rate, detection wavelength, and retention times.

### General Procedure for the preparation of 3-chloro-*N*-aryl substituted quinoxalin-2-amine (3a-f)<sup>1</sup>

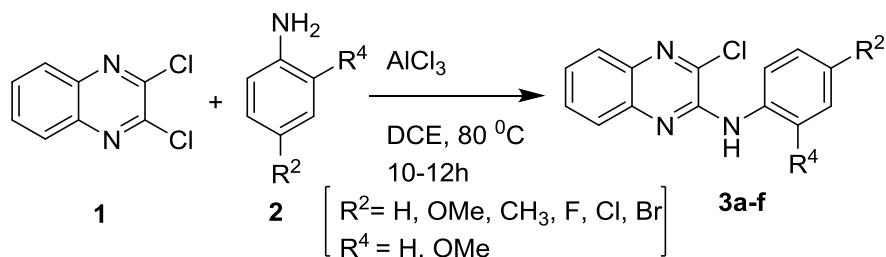

A mixture of 2,3-dichloroquinoxaline **1** (1.0 mmol), an appropriate amine **2** (1.0 mmol) and  $\text{AlCl}_3$  (1.25 mmol) in 1,2-dichloroethane (5mL) was stirred at  $80^\circ\text{C}$  for 10-12 h under a nitrogen atmosphere. After completion of the reaction, the mixture was cooled to room temperature, poured into ice-cold water (15 mL), stirred for 10 min and then extracted with ethylacetate ( $3 \times 10$  mL). The combined organic layers were washed with cold water ( $2 \times 10$  mL), brine (4mL) and dried over anhydrous  $\text{Na}_2\text{SO}_4$  and concentrated under vacuum. The residue obtained was purified by column chromatography on silica gel (230-400 mesh) using

ethylacetate/hexane to give the desired product **3a-f**.

### Typical procedure for the preparation of 2-(*p*-tolylxy)quinoline-3-carbaldehyde (**3g**)<sup>2</sup>

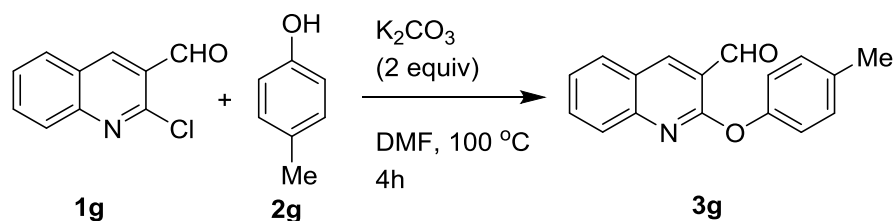

A 100 mL round bottomed flask, fitted with a reflux condenser, was charged with a mixture of 2-chloro-3-formylquinoline **1g** (1 mmol), phenol **2g** (1 mmol), anhydrous potassium carbonate (2 mmol) and dimethyl formamide (5 mL). The mixture was heated at  $100\text{ }^\circ\text{C}$  for 4h and the progress of the reaction was monitored by TLC. After the completion of reaction, the reaction mixture was cooled to room temperature and then poured into chilled water (50 mL) with continuous stirring followed by neutralization with 1.5N HCl until pH ~ 7 resulted. The solid mass separated was collected by filtration, washed well with water, dried and crystallized from ethylacetate to give the title compound.

### Typical procedure for the preparation of (*E*)-ethyl 3-(2-((3-chloroquinoxalin-2-yl)amino)-5-methoxyphenyl)acrylate (**5a**)

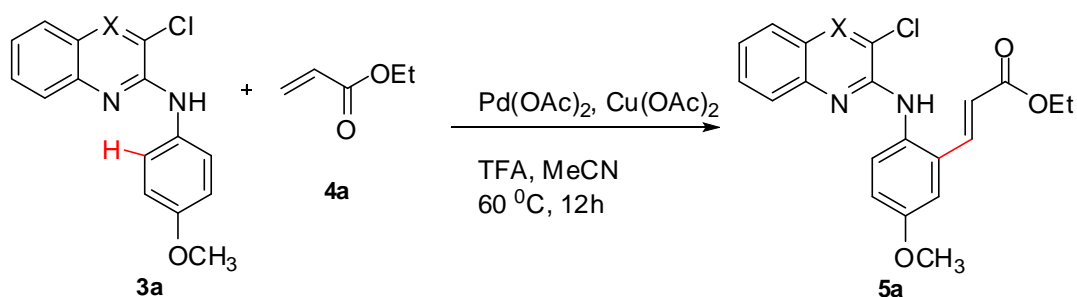

A mixture of 3-chloro-*N*-(4-methoxyphenyl)quinoxalin-2-amine **3a** (0.350 mmol), ethyl acrylate **4a** (0.526 mmol),  $Pd(OAc)_2$  (5 mol%),  $Cu(OAc)_2$  (0.526 mmol), TFA (0.42 mmol) in  $CH_3CN$  (2.5 mL) was heated at  $60\text{ }^\circ\text{C}$  in air for 12h. The progress of the reaction was monitored by TLC. After completion of the reaction, the mixture was cooled to RT, diluted with ethyl acetate (15 mL) and passed through celite. The resulting solution was washed with water (3 x 15 mL) followed by brine solution (25 mL), dried over anhydrous  $Na_2SO_4$ , filtered and concentrated

under reduced pressure. The residue was purified by column chromatography using ethyl acetate–hexane to give desired compound **5a**.

**Table S-1: synthesis of compound 5.**<sup>a</sup>

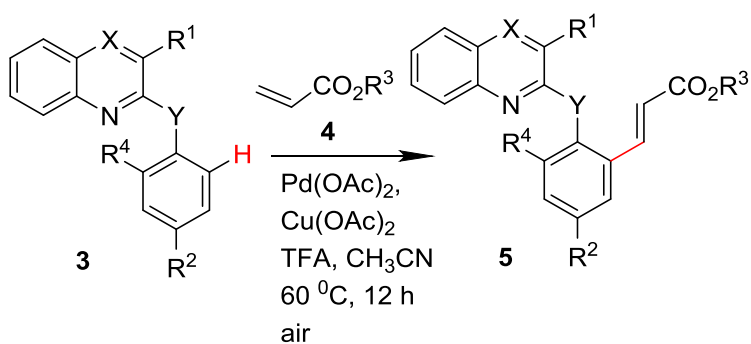

| Entry | Substrate ( <b>3</b> )                       | Acrylate ( <b>4</b> )                        | Product ( <b>5</b> )                         | Yield <sup>b</sup> (%) |
|-------|----------------------------------------------|----------------------------------------------|----------------------------------------------|------------------------|
| 1     | <p style="text-align: center;"><b>3a</b></p> | <p style="text-align: center;"><b>4a</b></p> | <p style="text-align: center;"><b>5a</b></p> | 84                     |
| 2     | <p style="text-align: center;"><b>3a</b></p> | <p style="text-align: center;"><b>4b</b></p> | <p style="text-align: center;"><b>5b</b></p> | 82                     |
| 3     | <p style="text-align: center;"><b>3a</b></p> | <p style="text-align: center;"><b>4c</b></p> | <p style="text-align: center;"><b>5c</b></p> | 67                     |

|   |                                                                                                      |    |                                                                                                       |    |
|---|------------------------------------------------------------------------------------------------------|----|-------------------------------------------------------------------------------------------------------|----|
| 4 | 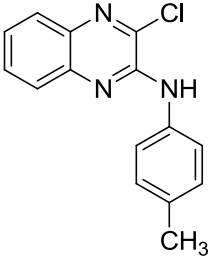 <p><b>3b</b></p>   | 4a |  <p><b>5d</b></p>   | 75 |
| 5 | 3b                                                                                                   | 4b |  <p><b>5e</b></p>   | 80 |
| 6 | 3b                                                                                                   | 4c |  <p><b>5f</b></p>  | 62 |
| 7 |  <p><b>3c</b></p> | 4a |  <p><b>5g</b></p> | 77 |
| 8 | 3c                                                                                                   | 4b |  <p><b>5h</b></p> | 71 |

|    |                                                                                                  |           |                                                                                                   |    |
|----|--------------------------------------------------------------------------------------------------|-----------|---------------------------------------------------------------------------------------------------|----|
| 9  | <b>3c</b>                                                                                        | <b>4c</b> | 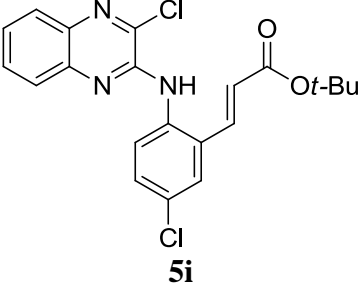<br><b>5i</b>   | 59 |
| 10 | <br><b>3d</b>   | <b>4a</b> | <br><b>5j</b>   | 78 |
| 11 | <b>3d</b>                                                                                        | <b>4b</b> | <br><b>5k</b>  | 74 |
| 12 | <br><b>3e</b> | <b>4a</b> | <br><b>5l</b> | 79 |
| 14 | <b>3e</b>                                                                                        | <b>4c</b> | <br><b>5m</b> | 74 |

|    |                                                                                                    |           |                                                                                                       |    |
|----|----------------------------------------------------------------------------------------------------|-----------|-------------------------------------------------------------------------------------------------------|----|
| 15 | 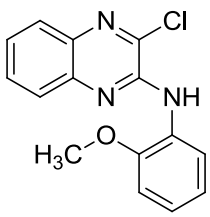 <p><b>3f</b></p> | <b>4b</b> |  <p><b>5n</b></p>   | 55 |
| 16 |  <p><b>3g</b></p> | <b>4a</b> |  <p><b>5o</b></p>   | 68 |
| 17 | <b>3g</b>                                                                                          | <b>4b</b> |  <p><b>5p</b></p>  | 72 |
| 18 | <b>3g</b>                                                                                          | <b>4c</b> |  <p><b>5q</b></p> | 61 |

<sup>a</sup>All the reactions are carried out using compound **3** (1 mmol), alkene **4** (1.5 mmol), Pd(OAc)<sub>2</sub> (5 mol%), Cu(OAc)<sub>2</sub> (1.5 mmol) and TFA (1.2 mmol) in CH<sub>3</sub>CN (2.5 mL) at 60 °C, under air.

<sup>b</sup>Isolated yield.

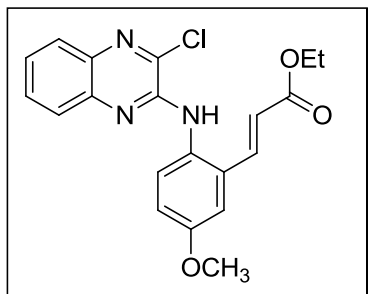

Yield: 84%; Light yellow; mp: 117-179 °C;  $R_f = 0.2$  (10% EtOAc/ *n*-hexane);  $^1\text{H}$  NMR (400 MHz,  $\text{CDCl}_3$ )  $\delta$ : 7.89 (d,  $J = 7.6$  Hz, 1H), 7.86-7.84 (m, 2H), 7.69-7.67 (m, 1H), 7.60-7.56 (m, 1H), 7.48-7.44 (m, 1H), 7.25 (s, 1H), 7.15 (d,  $J = 2.8$  Hz, 1H), 7.05 (dd,  $J = 8.8, 2.8$  Hz, 1H), 6.46 (d,  $J = 16.0$  Hz, 1H), 4.23 (q,  $J = 7.2$  Hz, 2H), 3.88 (s, 3H), 1.29 (t,  $J = 7.2$  Hz, 3H);  $^{13}\text{C}$  NMR (100 MHz,  $\text{CDCl}_3$ ): 166.4, 157.3, 146.0, 140.4, 139.4, 137.6, 137.3, 130.2, 130.0, 129.8, 127.8, 126.5 (2C), 126.0, 120.9, 116.8, 111.5, 60.6, 55.5, 14.1; MS (ES mass): 384.1 (M+1); HPLC: 98.8%, Column: Symmetry C-18 75 \* 4.6 mm, 3.5 $\mu\text{m}$ , mobile phase A: 0.1 % TFA in water, mobile phase B:  $\text{CH}_3\text{CN}$  (T/%B): 0/20, 0.5/50, 2/95, 8/95, 10/20, 12/20; flow rate: 1.0 mL/min; Diluent: ACN: WATER (90:10); UV 260.0 nm, retention time 3.8 min.

**(E)-Ethyl 3-(2-((3-chloroquinoxalin-2-yl)amino)-5-methoxyphenyl)acrylate (5b)**

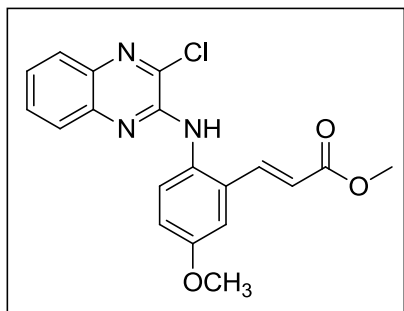

Compound **5b** was synthesized from **3a** following a procedure similar to that of compound **5a**  
 Yield: 82%; Light yellow; mp: 156-158 °C;  $R_f = 0.2$  (10% EtOAc/ *n*-hexane);  $^1\text{H}$  NMR (400 MHz,  $\text{CDCl}_3$ )  $\delta$ : 7.90-7.84 (m, 3H), 7.69-7.67 (m, 1H), 7.61-7.56 (m, 1H), 7.49-7.45 (m, 1H), 7.23 (s, 1H), 7.16 (d,  $J = 3.2$  Hz, 1H), 7.06 (dd,  $J = 8.8, 2.8$  Hz, 1H), 6.47 (d,  $J = 16.0$  Hz, 1H), 3.89 (s, 3H), 3.78 (s, 3H);  $^{13}\text{C}$  NMR (100 MHz,  $\text{CDCl}_3$ ): 166.8, 157.3, 146.1, 140.5, 139.7, 137.6, 137.3, 130.2, 129.8, 127.8, 126.6, 126.5, 126.1, 120.5, 116.8, 111.6, 109.9, 55.5, 51.7; MS (ES mass): 370.0 (M+1); HPLC: 98.3%, Column: Symmetry C-18 75 \* 4.6 mm, 3.5 $\mu\text{m}$ , mobile



phase A: 0.1 % TFA in water, mobile phase B: CH<sub>3</sub>CN (T/%B): 0/20, 3/20, 8/40, 15/95, 20/95, 25/20, 30/20; flow rate: 1.0 mL/min; Diluent: ACN: WATER (90:10); UV 255.0 nm, retention time 3.6 min.

**(E)-tert-butyl 3-(2-((3-chloroquinoxalin-2-yl)amino)-5-methoxyphenyl)acrylate (5c)**

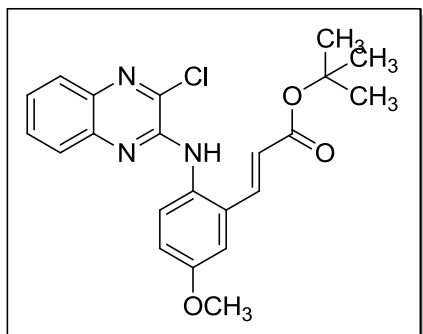

Compound **5c** was synthesized from **3a** following a procedure similar to that of compound **5a**. Yield: 67%; Light yellow; mp: 115-117 °C;  $R_f = 0.2$  (10% EtOAc/ *n*-hexane); <sup>1</sup>H NMR (400 MHz, CDCl<sub>3</sub>) δ: 7.89 (d,  $J = 8.8$  Hz, 1H), 7.86-7.84 (m, 1H), 7.78 (d,  $J = 16.0$  Hz, 1H), 7.69-7.67 (m, 1H), 7.60-7.56 (m, 1H), 7.48-7.44 (m, 1H), 7.27 (s, 1H), 7.15 (d,  $J = 2.8$  Hz, 1H), 7.04 (dd,  $J = 8.8, 2.8$  Hz, 1H), 6.38 (d,  $J = 16.0$  Hz, 1H), 3.88 (s, 3H), 1.48 (s, 9H); <sup>13</sup>C NMR (100 MHz, CDCl<sub>3</sub>): 165.6, 157.2, 146.0, 140.5, 138.2, 137.6, 137.2, 130.2, 130.0, 129.7, 127.8, 126.5, 126.3, 126.0, 122.8, 116.6, 111.4, 80.7, 55.5, 28.0; MS (ES mass): 412.1 (M+1); HPLC: 98.7%, Column: Symmetry C-18 75 \* 4.6 mm, 3.5μm, mobile phase A: 0.1 % TFA in water, mobile phase B: CH<sub>3</sub>CN (T/%B): 0/20, 0.5/50, 2/95, 8/95, 10/20, 12/20; flow rate: 1.0 mL/min; Diluent: ACN: WATER (90:10); UV 260.0 nm, retention time 4.1 min.

**(E)-Ethyl 3-(2-((3-chloroquinoxalin-2-yl)amino)-5-methylphenyl)acrylate (5d)**

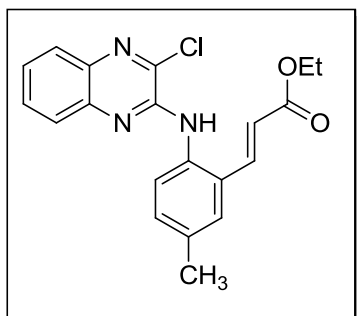

Compound **5d** was synthesized from **3b** following a procedure similar to that of compound **5a**

Yield: 75%; Light yellow; mp: 129-131 °C;  $R_f = 0.2$  (10% EtOAc/ *n*-hexane);  $^1\text{H}$  NMR (400 MHz,  $\text{CDCl}_3$ )  $\delta$ : 8.01 (d,  $J = 8.4$  Hz, 1H), 7.93 (d,  $J = 16.0$  Hz, 1H), 7.84 (d,  $J = 8.4$  Hz, 1H), 7.73 (d,  $J = 8.0$  Hz, 1H), 7.62 (t,  $J = 7.6$  Hz, 1H), 7.51-7.46 (m, 2H), 7.41 (s, 1H), 7.31 (d,  $J = 8.4$  Hz, 1H), 6.48 (d,  $J = 16.0$  Hz, 1H), 4.25 (q,  $J = 7.2$  Hz, 2H), 2.42 (s, 3H), 1.31 (t,  $J = 7.2$  Hz, 3H);  $^{13}\text{C}$  NMR (100 MHz,  $\text{CDCl}_3$ ): 166.5, 145.6, 140.4, 139.4 (2C), 137.7, 137.3, 135.1, 134.2, 131.5, 130.3, 128.0, 127.8, 126.6, 126.2, 124.0, 120.8, 60.5, 21.0, 14.2; MS (ES mass): 368.1 (M+1); HPLC: 95.0%, Column: Symmetry C-18 75 \* 4.6 mm, 3.5 $\mu\text{m}$ , mobile phase A: 0.1 % TFA in water, mobile phase B:  $\text{CH}_3\text{CN}$  (T/%B): 0/10, 2/10, 10/95, 20/95, 22/10, 25/10; flow rate: 1.0 mL/min; Diluent: ACN: WATER (90:10); UV 260.0 nm, retention time 4.0 min.

**(E)-Methyl 3-(2-((3-chloroquinoxalin-2-yl)amino)-5-methylphenyl)acrylate (5e)**

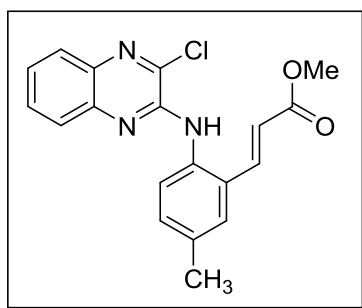

Compound **5e** was synthesized from **3b** following a procedure similar to that of compound **5a**. Yield: 80%; Light yellow; mp: 168-170 °C;  $R_f = 0.2$  (10% EtOAc/ *n*-hexane);  $^1\text{H}$  NMR (400 MHz,  $\text{CDCl}_3$ )  $\delta$ : 7.98 (d,  $J = 8.0$  Hz, 1H), 7.92 (d,  $J = 16.0$  Hz, 1H), 7.87-7.85 (m, 1H), 7.72-7.70 (m, 1H), 7.62-7.58 (m, 1H), 7.50-7.44 (m, 2H), 7.37 (s, 1H), 7.31-7.29 (m, 1H), 6.48 (d,  $J = 16.0$  Hz, 1H), 3.79 (s, 3H), 2.41 (s, 3H);  $^{13}\text{C}$  NMR (100 MHz,  $\text{CDCl}_3$ ): 166.9, 145.6, 140.3, 139.7, 137.7, 137.3, 135.1, 134.2, 131.5, 130.3, 128.0, 127.8 (2C), 126.5, 126.2, 124.0, 120.2, 51.7, 20.9; MS (ES mass): 354.1 (M+1); HPLC: 99.9%, Column: Symmetry C-18 75 \* 4.6 mm, 3.5 $\mu\text{m}$ , mobile phase A: 0.1 % TFA in water, mobile phase B:  $\text{CH}_3\text{CN}$  (T/%B): 0/20, 0.5/20, 2/95, 10/95, 10.5/95, 12/20; flow rate: 1.0 mL/min; Diluent: ACN: WATER (90:10); UV 230.0 nm, retention time 3.7 min.

**(E)-tert-butyl 3-(2-((3-chloroquinoxalin-2-yl)amino)-5-methylphenyl)acrylate (5f)**

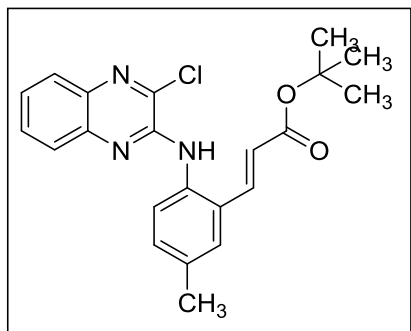

Compound **5f** was synthesized from **3b** following a procedure similar to that of compound **5a**. Yield: 62%; Light yellow; mp: 112-114 °C;  $R_f = 0.2$  (10% EtOAc/ *n*-hexane);  $^1\text{H NMR}$  (400 MHz,  $\text{CDCl}_3$ )  $\delta$ : 8.02 (d,  $J = 8.0$  Hz, 1H), 7.87-7.84 (m, 1H), 7.80 (d,  $J = 16.0$  Hz, 1H), 7.73-7.71 (m, 1H), 7.64-7.58 (m, 1H), 7.49-7.44 (m, 2H), 7.42 (s, 1H), 7.29-7.27 (m, 1H), 6.39 (d,  $J = 16.0$  Hz, 1H), 2.39 (s, 3H), 1.49 (s, 9H);  $^{13}\text{C NMR}$  (100 MHz,  $\text{CDCl}_3$ ): 165.7, 145.6, 140.4, 138.2, 137.2, 134.9, 134.0, 131.2, 130.2, 127.8 (2C), 127.7, 126.5, 126.1, 123.7, 122.6, 120.0, 80.6, 28.0, 20.9; MS (ES mass): 396.1 (M+1); HPLC: 98.3%, Column: Symmetry C-18 75 \* 4.6 mm, 3.5 $\mu\text{m}$ , mobile phase A: 0.1 % TFA in water, mobile phase B:  $\text{CH}_3\text{CN}$  (T/%B): 0/20, 0.5/20, 2/95, 8/95, 10/20, 12/20; flow rate: 1.0 mL/min; Diluent: ACN: WATER (90:10); UV 265.0 nm, retention time 3.1 min.

**(E)-Ethyl 3-(5-chloro-2-((3-chloroquinoxalin-2-yl)amino)phenyl)acrylate (5g)**

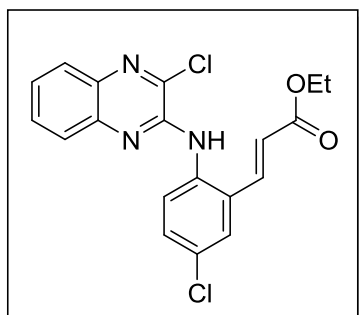

Compound **5g** was synthesized from **3c** following a procedure similar to that of compound **5a**. Yield: 77%; Light yellow; mp: 207-209 °C;  $R_f = 0.2$  (10% EtOAc/ *n*-hexane);  $^1\text{H NMR}$  (400 MHz,  $\text{CDCl}_3$ )  $\delta$ : 8.24 (d,  $J = 8.4$  Hz, 1H), 7.89-7.83 (m, 2H), 7.76-7.74 (m, 1H), 7.66-7.62 (m, 1H), 7.59 (d,  $J = 2.4$  Hz, 1H), 7.54-7.50 (m, 1H), 7.46-7.43 (m, 2H), 6.48 (d,  $J = 16.0$  Hz, 1H), 4.26 (q,  $J = 7.2$  Hz, 2H), 1.31 (t,  $J = 7.2$  Hz, 3H);  $^{13}\text{C NMR}$  (100 MHz,  $\text{CDCl}_3$ ): 166.0, 145.0,

140.0, 137.8, 137.6, 137.4, 135.2, 130.5, 130.4, 130.3, 128.9, 127.9, 127.3, 126.7, 126.5, 124.6, 122.5, 60.8, 14.1; MS (ES mass): 388.1 (M+1); HPLC: 95.5%, Column: Symmetry C-18 75 \* 4.6 mm, 3.5 $\mu$ m, mobile phase A: 0.1 % TFA in water, mobile phase B: CH<sub>3</sub>CN (T/%B): 0/10, 2/10, 10/95, 20/95, 22/10, 25/10; flow rate: 1.0 mL/min; Diluent: ACN: WATER (90:10); UV 260.0 nm, retention time 4.2 min.

**(E)-Methyl 3-(5-chloro-2-((3-chloroquinoxalin-2-yl)amino)phenyl)acrylate (5h)**

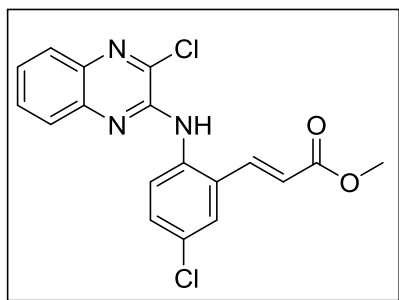

Compound **5h** was synthesized from **3c** following a procedure similar to that of compound **5a**. Yield: 71%; Light yellow; mp: 201-203 °C;  $R_f$  = 0.2 (10% EtOAc/ *n*-hexane); <sup>1</sup>H NMR (400 MHz, CDCl<sub>3</sub>)  $\delta$ : 8.22 (d,  $J$  = 8.8 Hz, 1H), 7.89-7.83 (m, 2H), 7.75-7.73 (m, 1H), 7.65-7.61 (m, 1H), 7.58 (d,  $J$  = 2.4 Hz, 1H), 7.53-7.49 (m, 1H), 7.46-7.43 (m, 2H), 6.48 (d,  $J$  = 16.0 Hz, 1H), 1.56 (s, 3H); <sup>13</sup>C NMR (100 MHz, CDCl<sub>3</sub>): 166.4, 145.0, 140.0, 138.1, 137.6, 137.5, 135.2, 130.5, 130.4, 130.3, 128.9, 127.9, 127.3, 126.7, 126.5, 124.7, 122.0, 51.9; MS (ES mass): 374.0 (M+1); HPLC: 97.8%, Column: Symmetry C-18 75 \* 4.6 mm, 3.5 $\mu$ m, mobile phase A: 0.1 % TFA in water, mobile phase B: CH<sub>3</sub>CN (T/%B): 0/20, 0.5/20, 2/95, 8/95, 10/20, 12/20; flow rate: 1.0 mL/min; Diluent: ACN: WATER (90:10); UV 260.0 nm, retention time 3.9 min.

**(E)-tert-butyl 3-(5-chloro-2-((3-chloroquinoxalin-2-yl)amino)phenyl)acrylate (5i)**

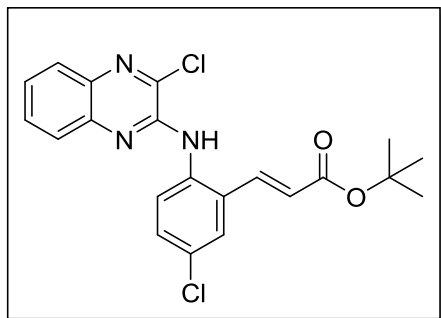

Compound **5i** was synthesized from **3c** following a procedure similar to that of compound **5a**  
Yield: 59%; Light yellow; mp: 147-149 °C;  $R_f = 0.2$  (10% EtOAc/ *n*-hexane);  $^1\text{H}$  NMR (400 MHz,  $\text{CDCl}_3$ )  $\delta$ : 8.28 (d,  $J = 8.8\text{Hz}$ , 1H), 7.90 (d,  $J = 8.0\text{ Hz}$ , 1H), 7.79-7.76 (m, 2H), 7.67 (t,  $J = 7.2\text{ Hz}$ , 1H), 7.60 (s, 1H), 7.55-7.44 (m, 3H), 6.43 (d,  $J = 16.0\text{ Hz}$ , 1H), 1.52 (m, 9H);  $^{13}\text{C}$  NMR (100 MHz,  $\text{CDCl}_3$ ): 165.2, 145.0, 140.1, 137.6, 137.5, 136.6, 135.1, 130.5, 130.2 (2C), 128.9, 127.9, 127.2, 126.6 (2C), 124.5, 124.4, 81.1, 28.1; MS (ES mass): 416.1 (M+1); HPLC: 98.2%, Column: Symmetry C-18 75 \* 4.6 mm, 3.5 $\mu\text{m}$ , mobile phase A: 0.1 % TFA in water, mobile phase B:  $\text{CH}_3\text{CN}$  (T/%B): 0/20, 0.5/20, 2/95, 8/95, 10/20, 12/20; flow rate: 1.0 mL/min; Diluent: ACN: WATER (90:10); UV 260.0 nm, retention time 4.7 min.

**(E)-Ethyl 3-(5-bromo-2-((3-chloroquinoxalin-2-yl)amino)phenyl)acrylate (5j)**

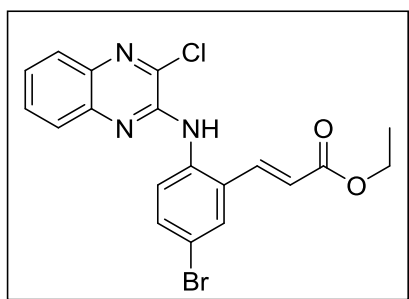

Compound **5j** was synthesized from **3d** following a procedure similar to that of compound **5a**  
Yield: 78%; Light yellow; mp: 129-131 °C;  $R_f = 0.2$  (10% EtOAc/ *n*-hexane);  $^1\text{H}$  NMR (400 MHz,  $\text{CDCl}_3$ )  $\delta$ : 8.21 (d,  $J = 8.8\text{ Hz}$ , 1H), 7.89-7.82 (m, 2H), 7.76-7.72 (m, 2H), 7.64 (t,  $J = 8.0\text{ Hz}$ , 1H), 7.59-7.57 (m, 1H), 7.54-7.49 (m, 1H), 7.46 (s, 1H), 6.48 (d,  $J = 16.0\text{ Hz}$ , 1H), 4.26 (q,  $J = 7.2\text{ Hz}$ , 2H), 1.31 (t,  $J = 7.2\text{ Hz}$ , 3H);  $^{13}\text{C}$  NMR (100 MHz,  $\text{CDCl}_3$ ): 166.0, 144.9, 140.0, 137.7, 137.6, 137.5, 135.7, 133.3, 130.6, 130.3, 129.1, 127.9, 126.7, 126.6, 124.6, 122.6, 117.8, 60.8, 14.2; MS (ES mass): 434.0 (M+3); HPLC: 95.9%, Column: Symmetry C-18 75 \* 4.6 mm, 3.5 $\mu\text{m}$ , mobile phase A: 0.1 % TFA in water, mobile phase B:  $\text{CH}_3\text{CN}$  (T/%B): 0/10, 2/10, 10/95, 20/95, 22/10, 25/10; flow rate: 1.0 mL/min; Diluent: ACN: WATER (90:10); UV 220.0 nm, retention time 4.7 min.

**(E)-Methyl 3-(5-bromo-2-((3-chloroquinoxalin-2-yl)amino)phenyl)acrylate (5k)**

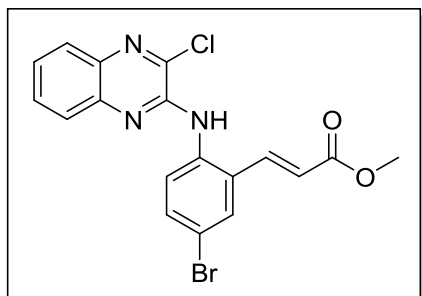

Compound **5k** was synthesized from **3d** following a procedure similar to that of compound **5a**  
 Yield: 74%; Light yellow; mp: 125-127 °C;  $R_f = 0.2$  (10% EtOAc/ *n*-hexane);  $^1\text{H NMR}$  (400 MHz,  $\text{CDCl}_3$ )  $\delta$ : 8.19 (d,  $J = 8.8$  Hz, 1H), 7.89-7.83 (m, 2H), 7.76-7.72 (m, 2H), 7.66-7.62 (m, 1H), 7.60-7.59 (m, 1H), 7.54-7.50 (m, 1H), 7.45 (s, 1H), 6.48 (d,  $J = 16.0$  Hz, 1H), 3.81 (s, 3H);  $^{13}\text{C NMR}$  (100 MHz,  $\text{CDCl}_3$ ): 166.4, 144.9, 140.0, 138.0, 137.6, 137.4, 135.7, 133.3, 130.5, 130.3, 129.1, 127.9, 126.7, 126.6, 124.7, 122.1, 117.8, 51.9; MS (ES mass): 420.0 (M+3); HPLC: 93.6%, Column: Symmetry C-18 75 \* 4.6 mm, 3.5 $\mu\text{m}$ , mobile phase A: 0.1 % TFA in water, mobile phase B:  $\text{CH}_3\text{CN}$  (T/%B): 0/10, 2/10, 10/95, 20/95, 22/10, 25/10; flow rate: 1.0 mL/min; Diluent: ACN: WATER (90:10); UV 260.0 nm, retention time 4.0 min.

**(E)-Ethyl 3-(2-((3-chloroquinoxalin-2-yl)amino)-5-fluorophenyl)acrylate (5l)**

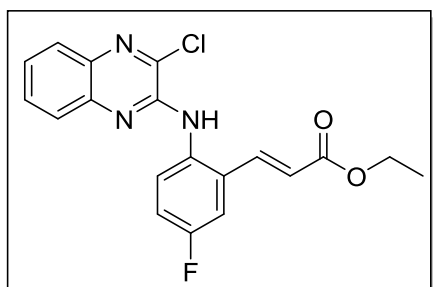

Compound **5l** was synthesized from **3e** following a procedure similar to that of compound **5a**  
 Yield: 79%; Light yellow; mp: 177-179 °C;  $R_f = 0.2$  (10% EtOAc/ *n*-hexane);  $^1\text{H NMR}$  (400 MHz,  $\text{CDCl}_3$ )  $\delta$ : 8.06 (dd,  $J = 8.8, 5.2$  Hz, 1H), 7.88-7.83 (m, 2H), 7.72-7.69 (m, 1H), 7.63-7.59 (m, 1H), 7.52-7.48 (m, 1H), 7.35=7.32 (m, 2H), 7.22-7.17 (m, 1H), 6.46 (d,  $J = 16.0$  Hz, 1H), 4.25 (q,  $J = 7.2$  Hz, 2H), 1.30 (t,  $J = 7.2$  Hz, 3H);  $^{13}\text{C NMR}$  (100 MHz,  $\text{CDCl}_3$ ): 166.0, 161.1 (C-F  $J = 244.5$ Hz), 158.7, 145.5, 140.2, 138.1, 137.5 (C-F  $J = 7.8$  Hz), 137.4, 132.7 (2C), 130.4, 130.2 (C-F  $J = 7.9$  Hz), 130.1, 127.8, 126.5 (C-F  $J = 7.4$  Hz), 126.4, 126.3, 126.2, 122.1, 117.6 (C-F  $J = 22.7$  Hz), 117.4, 113.7 (C-F  $J = 23.2$  Hz), 113.5, 60.7, 14.1; MS (ES mass): 372.0 (M+1); HPLC: 99.7%, Column: Symmetry C-18 75 \* 4.6 mm, 3.5 $\mu\text{m}$ , mobile phase A: 0.1 %

TFA in water, mobile phase B: CH<sub>3</sub>CN (T/%B): 0/20, 0.5/20, 2/95, 8/95, 10/20, 12/20; flow rate: 1.0 mL/min; Diluent: ACN: WATER (90:10); UV 260.0 nm, retention time 3.8 min.

**(E)-tert-butyl 3-(2-((3-chloroquinoxalin-2-yl)amino)-5-fluorophenyl)acrylate (5m)**

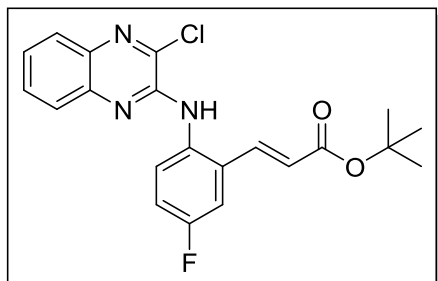

Compound **5m** was synthesized from **3e** following a procedure similar to that of compound **5a**  
Yield: 74%; Light yellow; mp: 167-169 °C; R<sub>f</sub> = 0.2 (10% EtOAc/ *n*-hexane); <sup>1</sup>H NMR (400 MHz, CDCl<sub>3</sub>) δ: 8.08 (dd, *J* = 8.8, 5.2 Hz, 1H), 7.88-7.85 (m, 1H), 7.76 (d, *J* = 15.6 Hz, 1H), 7.72-7.70 (m, 1H), 7.63-7.59 (m, 1H), 7.51-7.47 (m, 1H), 7.36 (s, 1H), 7.32 (dd, *J* = 9.2, 2.9 Hz, 1H), 7.22-7.14 (m, 1H), 6.38 (d, *J* = 15.6 Hz, 1H), 1.49 (s, 9H); <sup>13</sup>C NMR (100 MHz, CDCl<sub>3</sub>): 165.2, 161.1 (C-F *J* = 244.1Hz), 158.6, 148.8, 145.5, 140.2, 137.5, 137.4, 137.0, 132.6, 130.4, 130.2, 127.8, 126.5, 126.3, 126.2 (C-F *J* = 8.4 Hz), 126.1, 124.0, 117.4 (C-F *J* = 22.5 Hz), 117.1, 113.6 (C-F *J* = 23.3 Hz), 113.4, 109.9, 80.9, 28.0; MS (ES mass): 400.2 (M+1); HPLC: 99.7%, Column: Symmetry C-18 75 \* 4.6 mm, 3.5μm, mobile phase A: 0.1 % TFA in water, mobile phase B: CH<sub>3</sub>CN (T/%B): 0/20, 0.5/20, 2/95, 8/95, 10/20, 12/20; flow rate: 1.0 mL/min; Diluent: ACN: WATER (90:10); UV 220.0 nm, retention time 3.0 min.

**(E)-Methyl 3-(2-((3-chloroquinoxalin-2-yl)amino)-3-methoxyphenyl)acrylate (5n)**

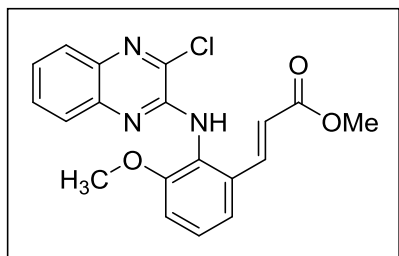

Compound **5n** was synthesized from **3f** following a procedure similar to that of compound **5a**  
Yield: 55%; Pale yellow; mp: 124-126 °C; R<sub>f</sub> = 0.2 (10% EtOAc/ *n*-hexane); <sup>1</sup>H NMR (400 MHz, CDCl<sub>3</sub>) δ: 7.85-7.83 (m, 1H), 7.72 (d, *J* = 16.0 Hz, 1H), 7.56-7.49 (m, 2H), 7.45-7.41 (m,

1H), 7.36-7.30 (m, 2H), 7.25 (s, 1H), 7.02-7.00 (m, 1H), 6.44 (d,  $J = 16.0$  Hz, 1H), 3.85 (s, 3H), 3.63 (s, 3H);  $^{13}\text{C}$  NMR (100 MHz,  $\text{CDCl}_3$ ): 166.4, 157.3, 146.0, 140.4, 139.4, 137.6, 137.3, 130.2, 130.0, 129.8, 127.8, 126.5 (2C), 126.0, 120.9, 116.8, 111.5, 60.6, 55.5; MS (ES mass): 370.1 (M+1); HPLC: 99.9%, Column: Symmetry C-18 75 \* 4.6 mm, 3.5 $\mu\text{m}$ , mobile phase A: 0.1 % TFA in water, mobile phase B:  $\text{CH}_3\text{CN}$  (T/%B): 0/20, 0.5/20, 2/95, 8/95, 10/20, 12/20; flow rate: 1.0 mL/min; Diluent: ACN: WATER (90:10); UV 220.0 nm, retention time 4.8 min.

**(E)-Ethyl 3-(2-((3-formylquinolin-2-yl)oxy)-5-methylphenyl)acrylate (5o)**

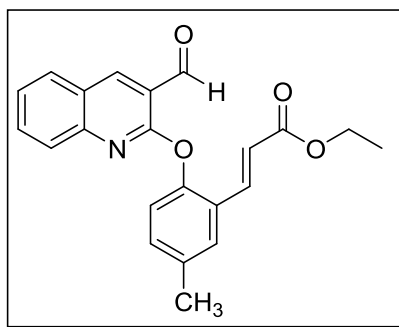

Compound **5o** was synthesized from **3g** following a procedure similar to that of compound **5a**. Yield: 68%; pink; mp: 160-162 °C;  $R_f = 0.2$  (10% EtOAc/ *n*-hexane);  $^1\text{H}$  NMR (400 MHz,  $\text{CDCl}_3$ )  $\delta$ : 10.71 (s, 1H), 8.78 (s, 1H), 7.92 (d,  $J = 8.0$  Hz, 1H), 7.87 (d,  $J = 16.0$  Hz, 1H), 7.71-7.70 (m, 2H), 7.55 (s, 1H), 7.50-7.46 (m, 1H), 7.30 (s, 1H), 7.18 (d,  $J = 8.4$  Hz, 1H), 6.48 (d,  $J = 16.0$  Hz, 1H), 4.23-4.15 (m, 2H), 2.45 (s, 3H), 1.27 (t,  $J = 7.2$  Hz, 3H);  $^{13}\text{C}$  NMR (100 MHz,  $\text{CDCl}_3$ ): 188.5, 166.7, 160.4, 149.6, 148.5, 140.8, 138.5, 135.2, 132.7, 131.8, 129.6, 128.0, 127.8, 127.2, 125.8, 125.2, 122.9, 120.0, 119.7, 60.4, 20.9, 14.2; MS (ES mass): 362.1 (M+1); HPLC: 98.1%, Column: Symmetry C-18 75 \* 4.6 mm, 3.5 $\mu\text{m}$ , mobile phase A: 0.1 % TFA in water, mobile phase B:  $\text{CH}_3\text{CN}$  (T/%B): 0/20, 0.5/20, 2/95, 8/95, 10/20, 12/20; flow rate: 1.0 mL/min; Diluent: ACN: WATER (90:10); UV 220.0 nm, retention time 4.9 min.

**(E)-Methyl 3-(2-((3-formylquinolin-2-yl)oxy)-5-methylphenyl)acrylate (5p)**



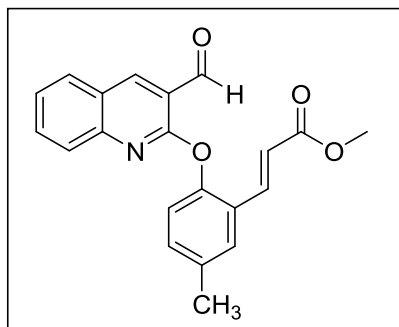

Compound **5p** was synthesized from **3g** following a procedure similar to that of compound **5a**. Yield: 72%; white; mp: 136-138 °C;  $R_f = 0.2$  (10% EtOAc/ *n*-hexane);  $^1\text{H NMR}$  (400 MHz,  $\text{CDCl}_3$ )  $\delta$ : 10.71 (s, 1H), 8.79 (s, 1H), 7.93 (d,  $J = 8.0$  Hz, 1H), 7.86 (d,  $J = 16.0$  Hz, 1H), 7.71 (d,  $J = 4.4$  Hz, 2H), 7.56 (s, 1H), 7.50-7.46 (m, 1H), 7.31 (s, 1H), 7.17 (d,  $J = 8.4$  Hz, 1H), 6.49 (d,  $J = 16.0$  Hz, 1H), 3.73 (s, 3H), 2.46 (s, 3H);  $^{13}\text{C NMR}$  (100 MHz,  $\text{CDCl}_3$ ): 188.5, 167.1, 160.4, 149.6, 148.5, 140.8, 138.8, 135.3, 132.7, 131.9, 129.6, 128.1, 127.8, 127.2, 125.8, 125.2, 122.9, 120.0, 119.3, 51.6, 20.9; MS (ES mass): 348.1 (M+1); HPLC: 96.1%, Column: Symmetry C-18 75 \* 4.6 mm, 3.5 $\mu\text{m}$ , mobile phase A: 0.1 % TFA in water, mobile phase B:  $\text{CH}_3\text{CN}$  (T/%B): 0/20, 0.5/20, 2/95, 8/95, 10/20, 12/20; flow rate: 1.0 mL/min; Diluent: ACN: WATER (90:10); UV 260.0 nm, retention time 3.8 min.

**(E)-tert-butyl 3-(2-((3-formylquinolin-2-yl)oxy)-5-methylphenyl)acrylate (5q)**

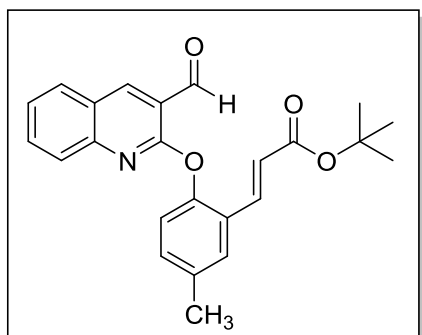

Compound **5q** was synthesized from **3g** following a procedure similar to that of compound **5a**. Yield: 61%; Pink; mp: 126-127 °C;  $R_f = 0.2$  (10% EtOAc/ *n*-hexane);  $^1\text{H NMR}$  (400 MHz,  $\text{CDCl}_3$ )  $\delta$ : 10.70 (s, 1H), 8.77 (s, 1H), 7.91 (d,  $J = 8.0$  Hz, 1H), 7.76 (d,  $J = 16.0$  Hz, 1H), 7.70 (d,  $J = 4.6$  Hz, 2H), 7.55 (s, 1H), 7.49-7.45 (m, 1H), 7.28 (s, 1H), 7.17 (d,  $J = 8.4$  Hz, 1H), 6.40 (d,  $J = 16.0$  Hz, 1H), 2.44 (s, 3H), 1.44 (s, 9H);  $^{13}\text{C NMR}$  (100 MHz,  $\text{CDCl}_3$ ): 188.5, 165.9, 160.4, 149.5, 148.5, 140.7, 137.4, 135.1, 132.6, 131.6, 129.9, 129.5, 127.8, 127.3, 125.7, 125.1,

122.9, 121.4, 119.9, 80.4, 28.0, 20.9; MS (ES mass): 388.0 (M-1); HPLC: 97.6%, Column: Symmetry C-18 75 \* 4.6 mm, 3.5 $\mu$ m, mobile phase A: 0.1 % TFA in water, mobile phase B: CH<sub>3</sub>CN (T/%B): 0/20, 0.5/20, 2/95, 8/95, 10/20, 12/20; flow rate: 1.0 mL/min; Diluent: ACN: WATER (90:10); UV 260.0 nm, retention time 4.2 min.

### General procedure for the Ru-catalyzed direct *ortho* C-H alkenylation of **3a-b**

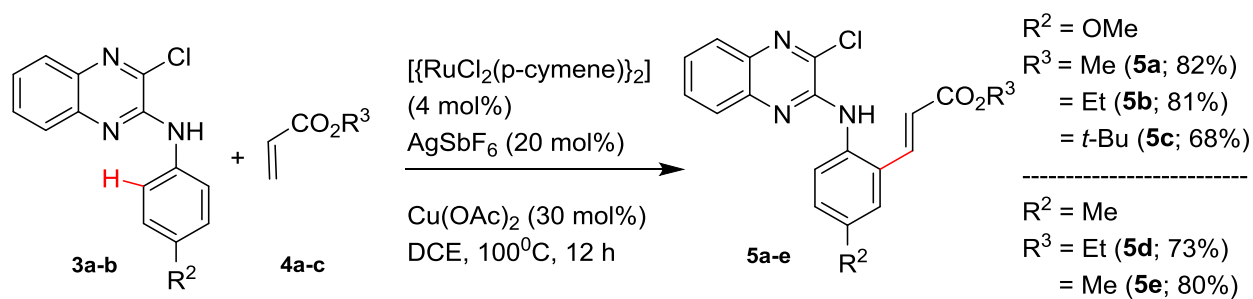

To a mixture of [ $\{\text{RuCl}_2(\text{p-cymene})\}_2$ ] (0.04 mmol, 4 mol %),  $\text{AgSbF}_6$  (0.20 mmol, 20 mol %),  $\text{Cu}(\text{OAc})_2$  (0.30 mmol, 30 mol %) and 3-chloro-*N*-aryl quinoxalin-2-amine **3a-b** (1.0 equiv), taken in a sealed tube (fitted with a septum) was added acrylate **4a-c** (1.5 equiv) and then dichloroethane (3.0 mL) via a syringe under nitrogen. The mixture was allowed to stir for 5 min at room temperature. Then, the septum was taken off and the reaction mixture was stirred under an open air for an additional 10 min. The tube was covered with a screw cap and the reaction mixture was allowed to stir at 100  $^\circ\text{C}$  for 12 h. After completion of the reaction the mixture was cooled to room temperature, transferred to an RB flask and solvent was evaporated. The residue was diluted with ethylacetate (5 mL) and filtered through Celite. The filtrate was washed with water (3 x 15 mL) followed by brine solution (20 mL), dried over anhydrous  $\text{Na}_2\text{SO}_4$ , filtered and concentrated under vacuum. The residue obtained was purified by column chromatography on silica gel (230-400 mesh) using ethylacetate/hexane to give the desired product **5a-e**.

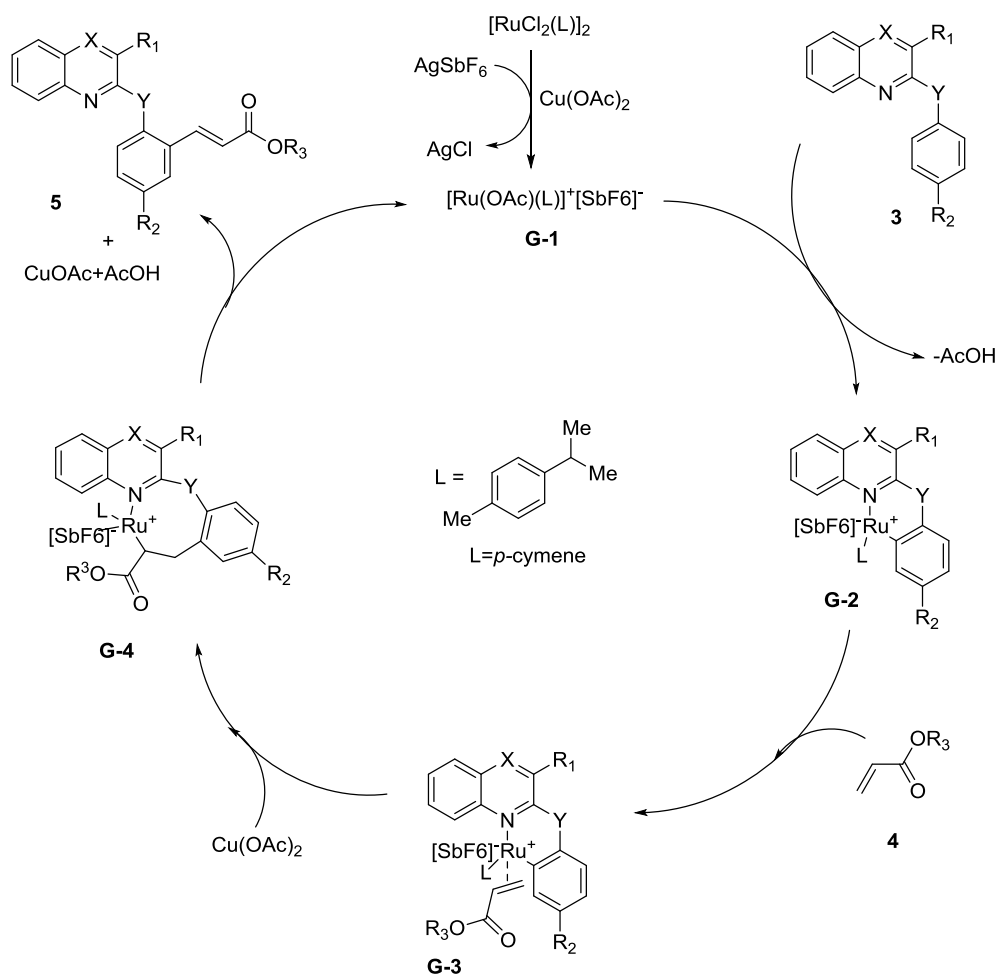

**Scheme S-1.** The proposed reaction mechanism for Ru-catalyzed direct *ortho* C-H alkenylation of **3a-b**.

**General procedure for the preparation of (*E*)-Alkyl 3-(10-substituted-6-chlorobenzo[4,5]imidazo[1,2-*a*]quinoxalin-8-yl)acrylate (**6a-d**)**

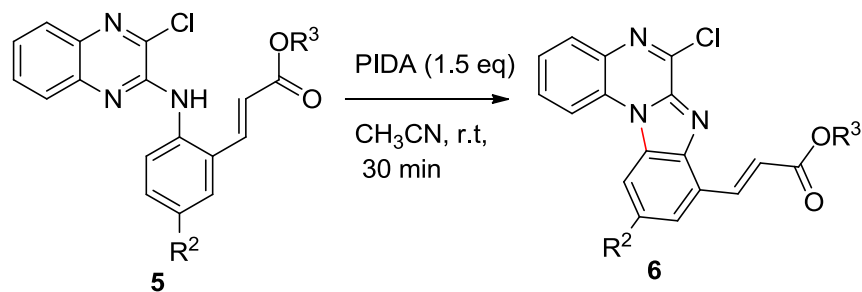

To a solution of **5** (1.0 mmol) in acetonitrile (5 mL) was added PIDA (1.5 mmol) and the solution was allowed to stirred at room temperature for 30 min. After completion of the reaction

(indicated by TLC), the mixture was extracted with ethylacetate (3 x 10 mL). The combined organic phase was collected, washed with brine and dried over anhydrous Na<sub>2</sub>SO<sub>4</sub>, filtered and concentrated under reduced pressure. The residue was purified by column chromatography using ethyl acetate–hexane to give desired compound **6**.

**Table S-2: Synthesis of compound 6<sup>a</sup>**

| Entry | Substrate ( <b>5</b> )                                                                                                           | Product ( <b>6</b> )                                                                                                              | Yield <sup>b</sup> (%) |
|-------|----------------------------------------------------------------------------------------------------------------------------------|-----------------------------------------------------------------------------------------------------------------------------------|------------------------|
| 1     | 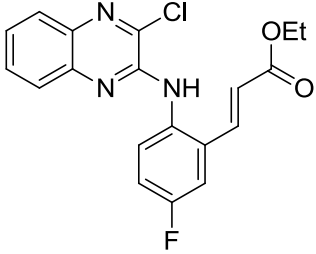 <p style="text-align: center;"><b>5l</b></p>   |  <p style="text-align: center;"><b>6a</b></p>   | 90                     |
| 2     |  <p style="text-align: center;"><b>5m</b></p>  |  <p style="text-align: center;"><b>6b</b></p>  | 85                     |
| 3     |  <p style="text-align: center;"><b>5j</b></p> |  <p style="text-align: center;"><b>6c</b></p> | 91                     |
| 4     |  <p style="text-align: center;"><b>5k</b></p> |  <p style="text-align: center;"><b>6d</b></p> | 82                     |

|  |           |           |  |
|--|-----------|-----------|--|
|  | <b>5g</b> | <b>6d</b> |  |
|--|-----------|-----------|--|

<sup>a</sup>All the reactions are carried out using compound **5** (1 mmol), PIDA (1.5 mmol) in CH<sub>3</sub>CN (2.5 mL) at room temperature in 30 min, under air.

<sup>b</sup>Isolated yield.

**(E)-Ethyl 3-(6-chloro-10-fluorobenzo[4,5]imidazo[1,2-a]quinoxalin-8-yl)acrylate (6a)**

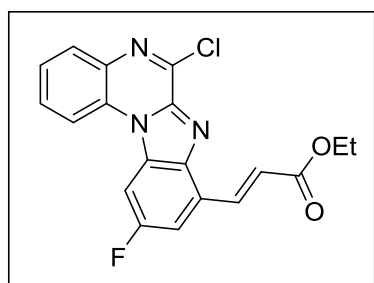

Yield: 90%; white solid; mp: 221-223 °C;  $R_f$  = 0.2 (10% EtOAc/ *n*-hexane); <sup>1</sup>H NMR (400 MHz, CDCl<sub>3</sub>) δ: 8.34 (d,  $J$  = 8.0 Hz, 1H), 8.23 (d,  $J$  = 16.0 Hz, 1H), 8.14-8.08 (m, 2H), 7.84-7.79 (m, 1H), 7.68-7.64 (m, 1H), 7.56 (dd,  $J$  = 9.8, 2.0 Hz, 1H), 7.43 (d,  $J$  = 16.0 Hz, 1H), 4.36 (q,  $J$  = 7.2 Hz, 2H), 1.41 (t,  $J$  = 7.2 Hz, 3H); <sup>13</sup>C NMR (100 MHz, CDCl<sub>3</sub>): 166.8, 161.4 (C-F  $J$  = 244.5Hz), 159.0, 144.7, 139.2, 138.7, 138.6, 134.5, 131.3, 131.2, 130.6 (C-F  $J$  = 40.6Hz), 130.2, 129.7, 129.6, 128.9 (C-F  $J$  = 9.6Hz), 126.7, 124.3, 114.7 (C-F  $J$  = 25.6Hz), 114.4 (2C), 102.1 (C-F  $J$  = 29.0 Hz), 101.8, 60.8, 14.3; MS (ES mass): 370.1 (M+1); HPLC: 97.4%, Column: Symmetry C-18 75 \* 4.6 mm, 3.5μm, mobile phase A: 0.1 % TFA in water, mobile phase B: CH<sub>3</sub>CN (T/%B): 0/20, 0.5/20, 2/95, 8/95, 10/20, 12/20.; flow rate: 1.0 mL/min; Diluent: ACN: WATER (90:10); UV 220.0 nm, retention time 4.8 min.

**(E)-tert-butyl 3-(6-chloro-10-fluorobenzo[4,5]imidazo[1,2-a]quinoxalin-8-yl)acrylate (6b)**

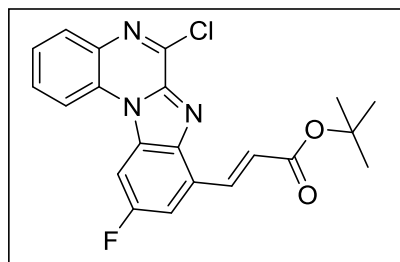

Yield: 85%; white solid; mp: 198-200 °C;  $R_f$  = 0.2 (10% EtOAc/ *n*-hexane); <sup>1</sup>H NMR (400 MHz, CDCl<sub>3</sub>) δ: 8.35 (d,  $J$  = 8.0 Hz, 1H), 8.18 (d,  $J$  = 16.0 Hz, 1H), 8.14 (d,  $J$  = 8.4 Hz, 1H), 8.09 (dd,  $J$  = 8.7, 1.9 Hz, 1H), 7.84-7.80 (m, 1H), 7.67 (t,  $J$  = 7.6 Hz, 1H), 7.55 (dd,  $J$  = 9.8, 1.9 Hz, 1H),

7.32 (d,  $J = 16.0$  Hz, 1H), 1.59 (s, 9H);  $^{13}\text{C}$  NMR (100 MHz,  $\text{CDCl}_3$ ): 166.1, 161.5, 159.0 (C-F  $J = 243.6$  Hz), 144.7, 139.3, 139.2, 137.6 (2C), 134.5, 130.5, 130.1, 128.9, 128.2, 126.6, 126.1, 114.4, 114.2, 101.8, 101.5 (C-F  $J = 28.9$  Hz), 80.9, 28.2; MS (ES mass): 398.0 (M+1); HPLC: 99.9%, Column: Symmetry C-18 75 \* 4.6 mm, 3.5 $\mu\text{m}$ , mobile phase A: 0.1 % TFA in water, mobile phase B:  $\text{CH}_3\text{CN}$  (T/%B): 0/20, 0.5/20, 2/95, 8/95, 10/20, 12/20,; flow rate: 1.0 mL/min; Diluent: ACN: WATER (90:10); UV 220.0 nm, retention time 4.8 min.

**(E)-Ethyl 3-(10-bromo-6-chlorobenzo[4,5]imidazo[1,2-*a*]quinoxalin-8-yl)acrylate (6c)**

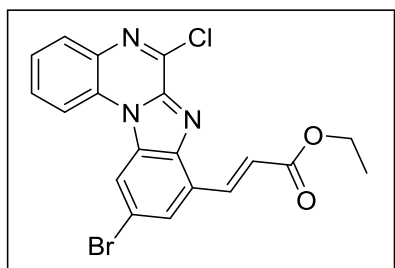

Yield: 91%; white solid; mp: 209-211  $^\circ\text{C}$ ;  $R_f = 0.2$  (10% EtOAc/ *n*-hexane);  $^1\text{H}$  NMR (400 MHz,  $\text{CDCl}_3$ )  $\delta$ : 8.55 (s, 1H), 8.38 (d,  $J = 8.4$  Hz, 1H), 8.20-8.12 (m, 2H), 7.88 (s, 1H), 7.86-7.82 (m, 1H), 7.68 (t,  $J = 7.6$  Hz, 1H), 7.45 (d,  $J = 16.0$  Hz, 1H), 4.34 (q,  $J = 7.2$  Hz, 2H), 1.40 (t,  $J = 7.2$  Hz, 3H);  $^{13}\text{C}$  NMR (100 MHz,  $\text{CDCl}_3$ ): 166.8, 144.6, 141.4, 139.2, 138.5, 134.6, 132.3, 131.0, 130.6, 130.3, 129.3, 128.8, 126.8, 124.4, 118.6, 117.9, 114.6, 60.7, 14.3; MS (ES mass): 431.9 (M+3); HPLC: 99.9%, Column: Symmetry C-18 75 \* 4.6 mm, 3.5 $\mu\text{m}$ , mobile phase A: 0.1 % TFA in water, mobile phase B:  $\text{CH}_3\text{CN}$  (T/%B): 0/20, 0.5/20, 2/95, 8/95, 10/20, 12/20,; flow rate: 1.0 mL/min; Diluent: ACN: WATER (90:10); UV 220.0 nm, retention time 4.8 min.

**(E)-Ethyl 3-(6,10-dichlorobenzo[4,5]imidazo[1,2-*a*]quinoxalin-8-yl)acrylate (6d)**

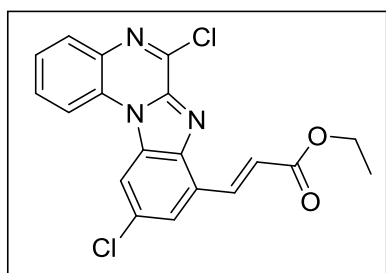

Yield: 82%; white solid; mp: 185-187  $^\circ\text{C}$ ;  $R_f = 0.2$  (10% EtOAc/ *n*-hexane);  $^1\text{H}$  NMR (400 MHz,  $\text{CDCl}_3$ )  $\delta$ : 8.41-8.39 (m, 2H), 8.21 (d,  $J = 16.0$  Hz, 1H), 8.15 (dd,  $J = 8.0, 1.2$  Hz, 1H), 7.86-7.82

(m, 1H), 7.77 (s, 1H), 7.68 (t,  $J = 7.6$  Hz, 1H), 7.47 (d,  $J = 16.0$  Hz, 1H), 4.35 (q,  $J = 7.2$  Hz, 2H), 1.40 (t,  $J = 7.2$  Hz, 3H);  $^{13}\text{C}$  NMR (100 MHz,  $\text{CDCl}_3$ ): 166.8, 144.7, 138.6, 134.6, 131.9, 131.2, 130.6, 130.3, 129.8, 129.4, 126.8, 126.7, 125.8, 125.7, 124.4, 114.9, 114.6, 60.7, 14.3; MS (ES mass): 385.9 (M+1); HPLC: 99.8%, Column: Symmetry C-18 75 \* 4.6 mm, 3.5 $\mu\text{m}$ , mobile phase A: 0.1 % TFA in water, mobile phase B:  $\text{CH}_3\text{CN}$  (T/%B): 0/20, 0.5/20, 2/95, 8/95, 10/20, 12/20; flow rate: 1.0 mL/min; Diluent: ACN: WATER (90:10); UV 220.0 nm, retention time 4.4 min.

## References:

1. B. Prasad, K. S. Kumar, P. VijayaBabu, K. Anusha, D. Rambabu, A. Kandale, G. R. Vanaja, A. M. Kalle and M. Pal, *Tetrahedron Lett.*, **2012**, 53, 6059.
2. D. C. Mungra, M. P. Patel, D. P. Rajani, and R. G. Patel, *Eur. J. Med. Chem.*, **2011**, 46, 4192.

## Pharmacology

### In vitro assay for PDE4B

**Cells and Reagents:** Sf9 cells were obtained from ATCC (Washington D.C., USA) and were routinely maintained in Grace's supplemented medium (Invitrogen) with 10% FBS. cAMP was purchased from SISCO Research Laboratories (Mumbai, India). PDElight HTS cAMP phosphodiesterase assay kit was procured from Lonza (Basel, Switzerland). PDE4B1 clone was procured from OriGene Technologies (Rockville, MD, USA). PDE4D2 enzyme was purchased from BPS Bioscience (San Diego, CA, USA).

**PDE4B protein production and purification:** PDE4B1 cDNA was sub-cloned into pFAST Bac HTB vector (Invitrogen) and transformed into DH10Bac (Invitrogen) competent cells. Recombinant bacmids were tested for integration by PCR analysis. Sf9 cells were transfected with bacmid using Lipofectamine 2000 (Invitrogen) according to manufacturer's instructions. Subsequently, P3 viral titer was amplified, cells were infected and 48 h post infection cells were lysed in lysis buffer (50 mM Tris-HCl pH 8.5, 10 mM 2-Mercaptoethanol, 1 % protease inhibitor cocktail (Roche), 1 % NP40). Recombinant His-tagged PDE4B protein was purified as previously described elsewhere (Wang et al., 1997). Briefly, lysate was centrifuged at 10,000 rpm for 10 min at 4°C and supernatant was collected. Supernatant was mixed with Ni-NTA resin

(GE Life Sciences) in a ratio of 4:1 (v/v) and equilibrated with binding buffer (20 mM Tris-HCl pH 8.0, 500 mM-KCl, 5 mM imidazole, 10 mM 2-mercaptoethanol and 10 % glycerol) in a ratio of 2:1 (v/v) and mixed gently on rotary shaker for 1 hour at 4°C. After incubation, lysate-Ni-NTA mixture was centrifuged at 4,500 rpm for 5 min at 4°C and the supernatant was collected as the flow-through fraction. Resin was washed twice with wash buffer (20 mM Tris-HCl pH 8.5, 1 M KCl, 10 mM 2-Mercaptoethanol and 10% glycerol). Protein was eluted sequentially twice using elution buffers (Buffer I: 20 mM Tris-HCl pH 8.5, 100 mM KCl, 250 mM imidazole, 10 mM 2-mercaptoethanol, 10% glycerol, Buffer II: 20 mM Tris-HCl pH 8.5, 100 mM KCl, 500 mM imidazole, 10 mM 2-mercaptoethanol, 10% glycerol). Eluates were collected in four fractions and analyzed by SDS-PAGE. Eluates containing PDE4B protein were pooled and stored at -80°C in 50% glycerol until further use.

**PDE4 enzymatic assay:** The inhibition of PDE4 enzyme was measured using PDE light HTS cAMP phosphodiesterase assay kit (Lonza) according to manufacturer's recommendations. Briefly, 10 ng of in house purified PDE4B1 enzyme was pre-incubated either with DMSO (vehicle control) or compound for 15 min before incubation with the substrate cAMP (5 µM) for 1 hour. The reaction was halted with stop solution and reaction mix was incubated with detection reagent for 10 minutes in dark. Luminescence values (RLUs) were measured by a Multilabel plate reader (Perkin Elmer 1420 Multilabel counter). The percentage of inhibition was calculated using the following formula:

$$\% \text{ inhibition} = \frac{(RLU \text{ of vehicle control} - RLU \text{ of inhibitor})}{RLU \text{ of vehicle control}} \times 100$$



Copies of  $^1\text{H}$  and  $^{13}\text{C}$  NMR spectra

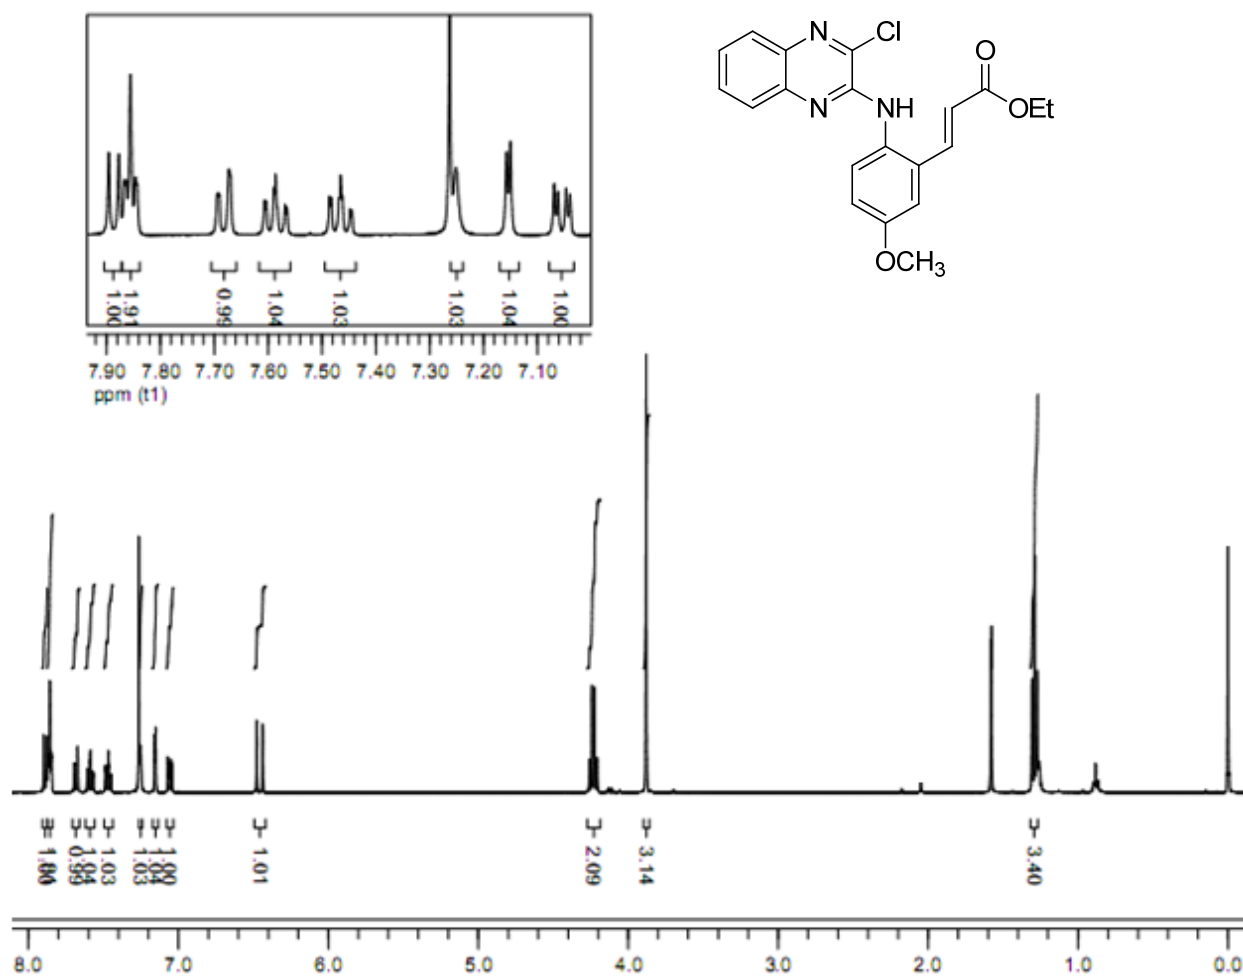

Fig. 1:  $^1\text{H}$  NMR spectra of compound **5a** ( $\text{CDCl}_3$ , 400 MHz)

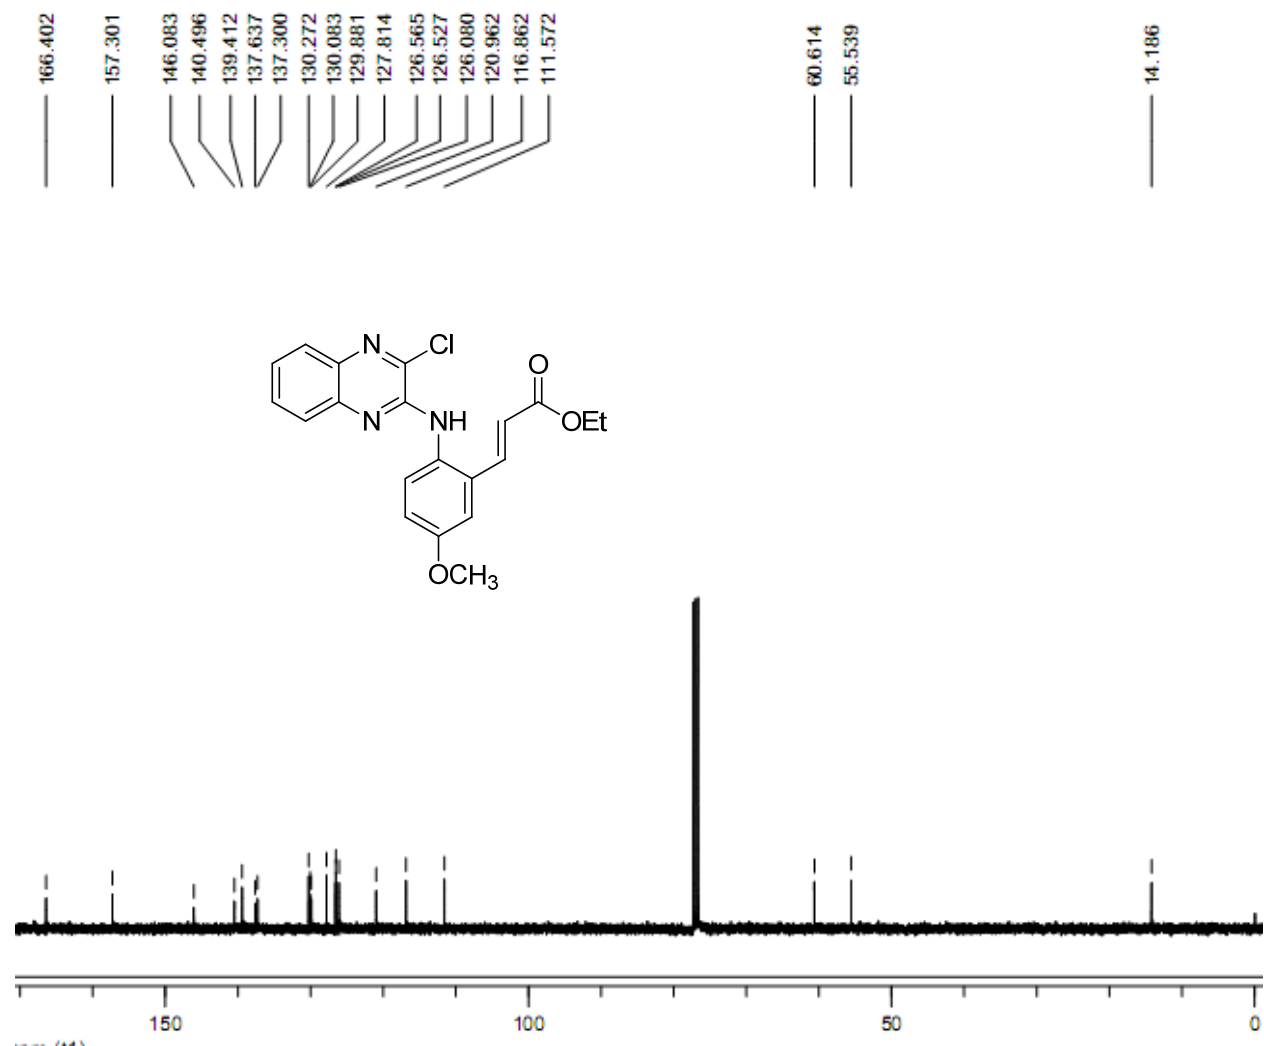

Fig. 2: <sup>13</sup>C NMR spectra of compound **5a** (CDCl<sub>3</sub>, 100 MHz)

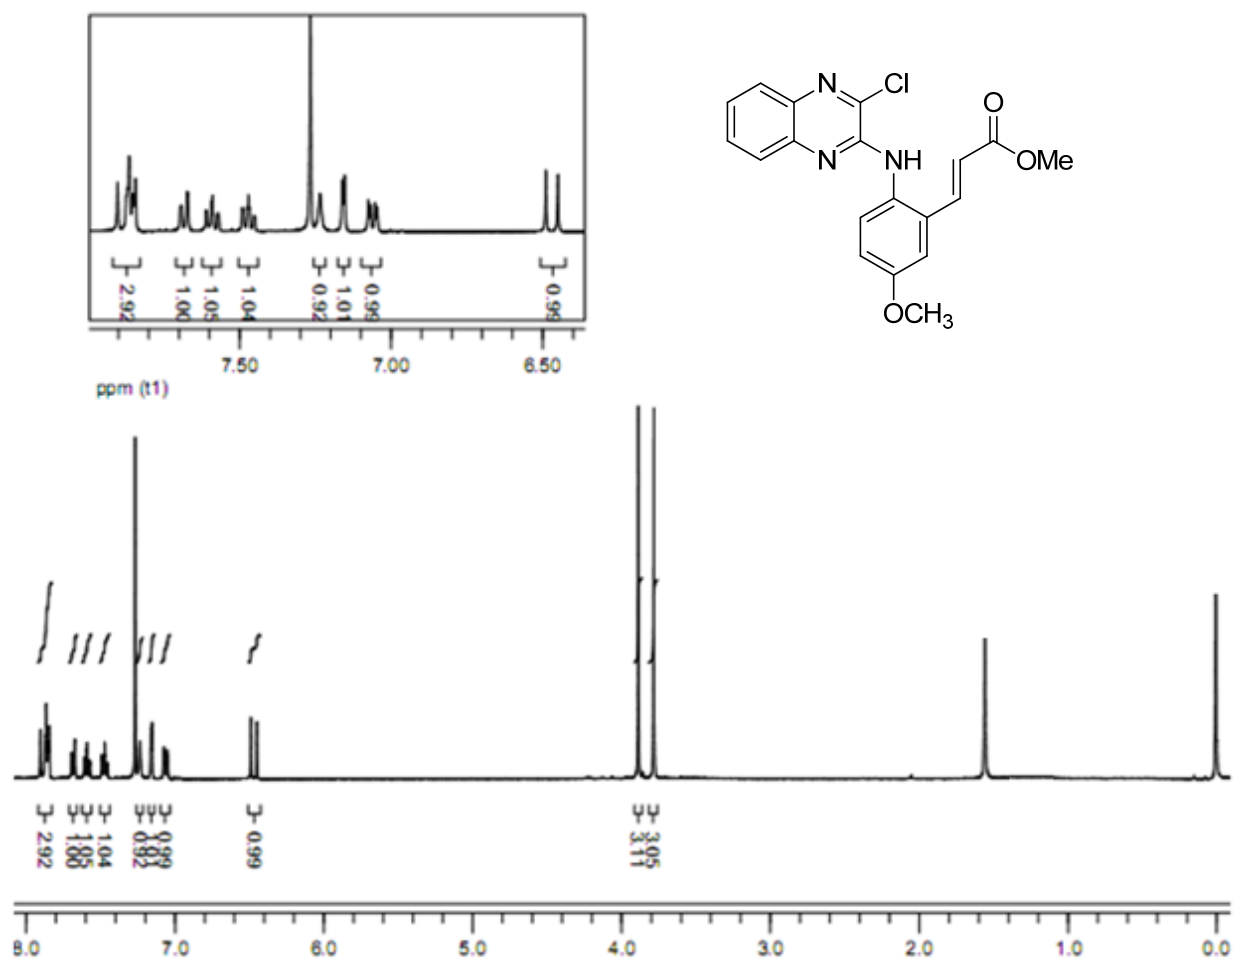

Fig. 3: <sup>1</sup>H NMR spectra of compound **5b** (CDCl<sub>3</sub>, 400 MHz)

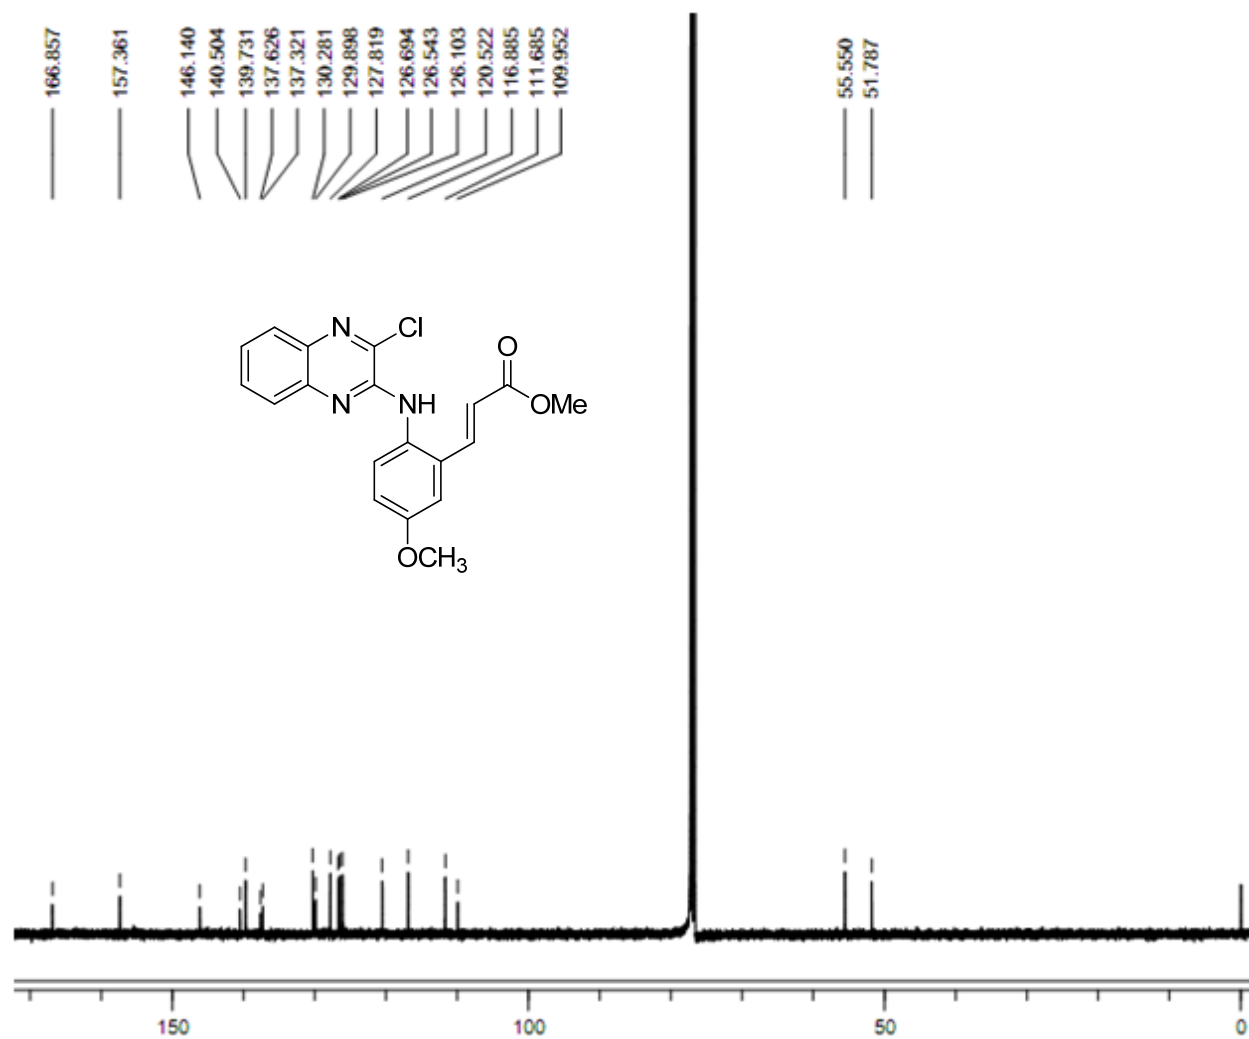

Fig. 4:  $^{13}\text{C}$  NMR spectra of compound **5b** ( $\text{CDCl}_3$ , 100 MHz)

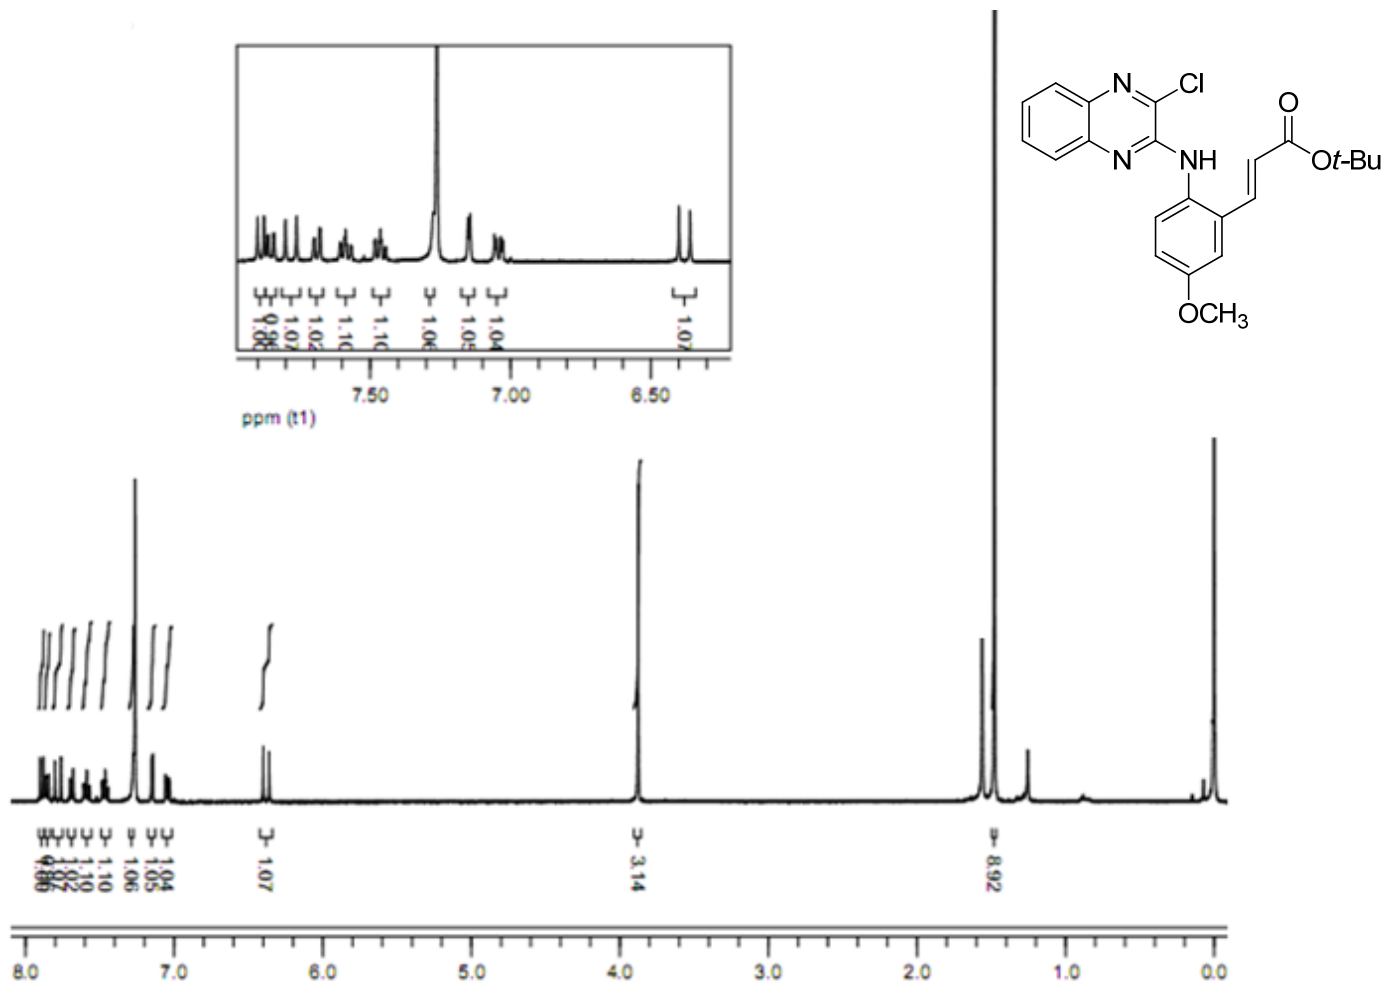

Fig. 5:  $^1\text{H}$  NMR spectra of compound **5c** ( $\text{CDCl}_3$ , 400 MHz)

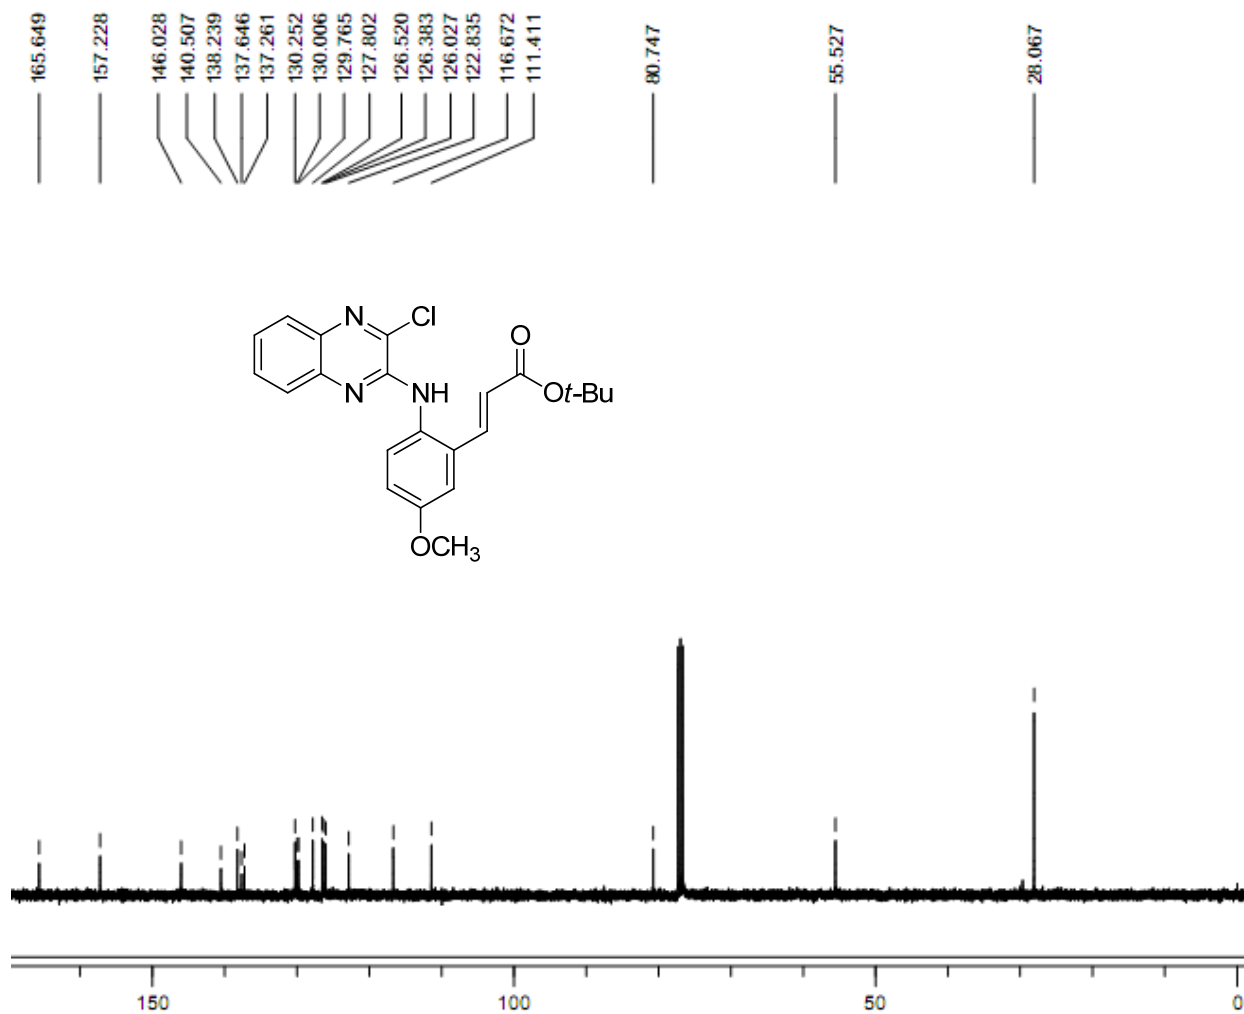

Fig.6: <sup>13</sup>C NMR spectra of compound **5c** (CDCl<sub>3</sub>, 100 MHz)

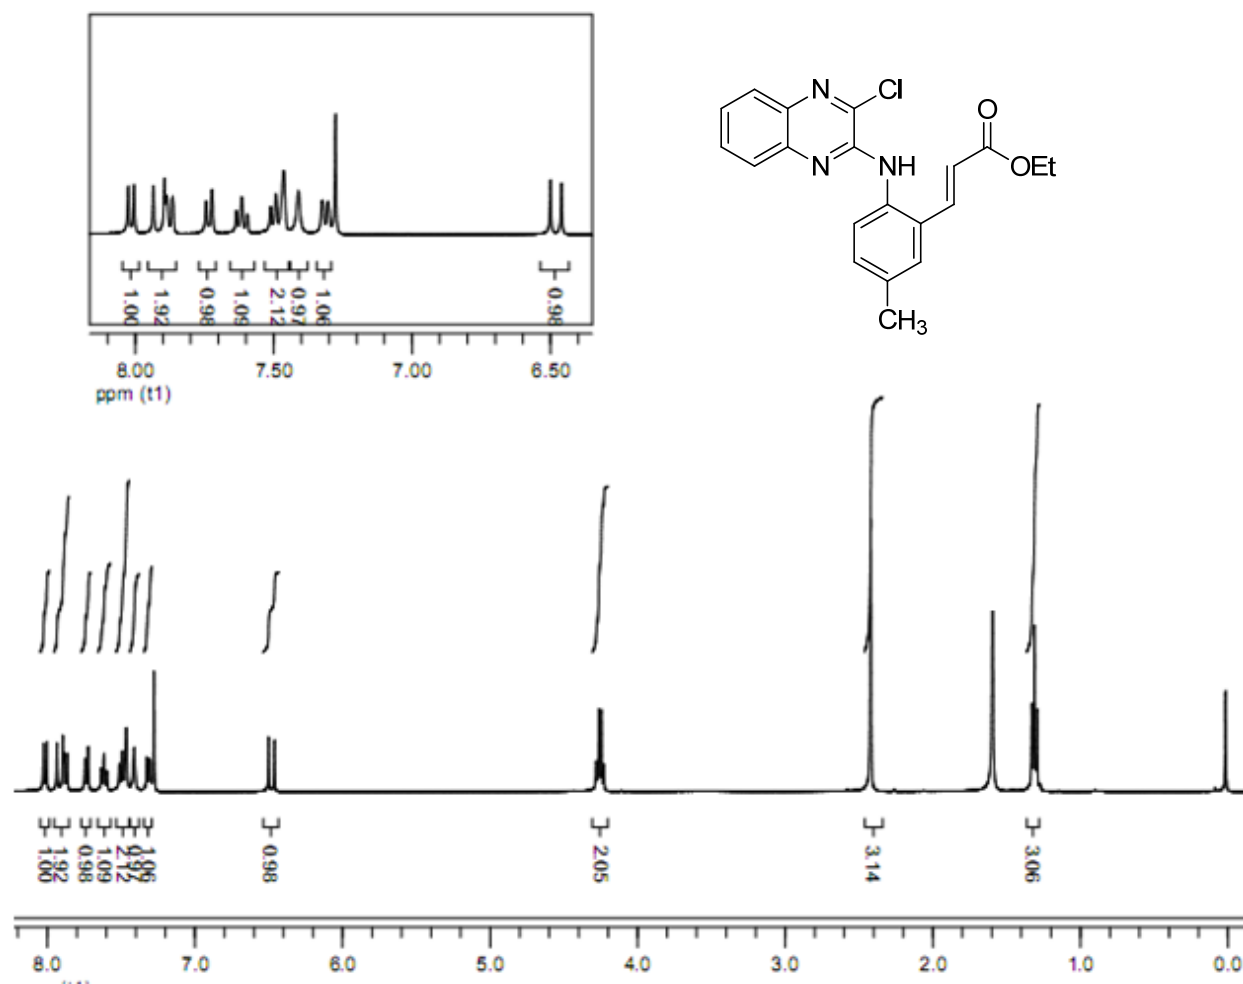

Fig. 7:  $^1\text{H}$  NMR spectra of compound **5d** ( $\text{CDCl}_3$ , 400 MHz)

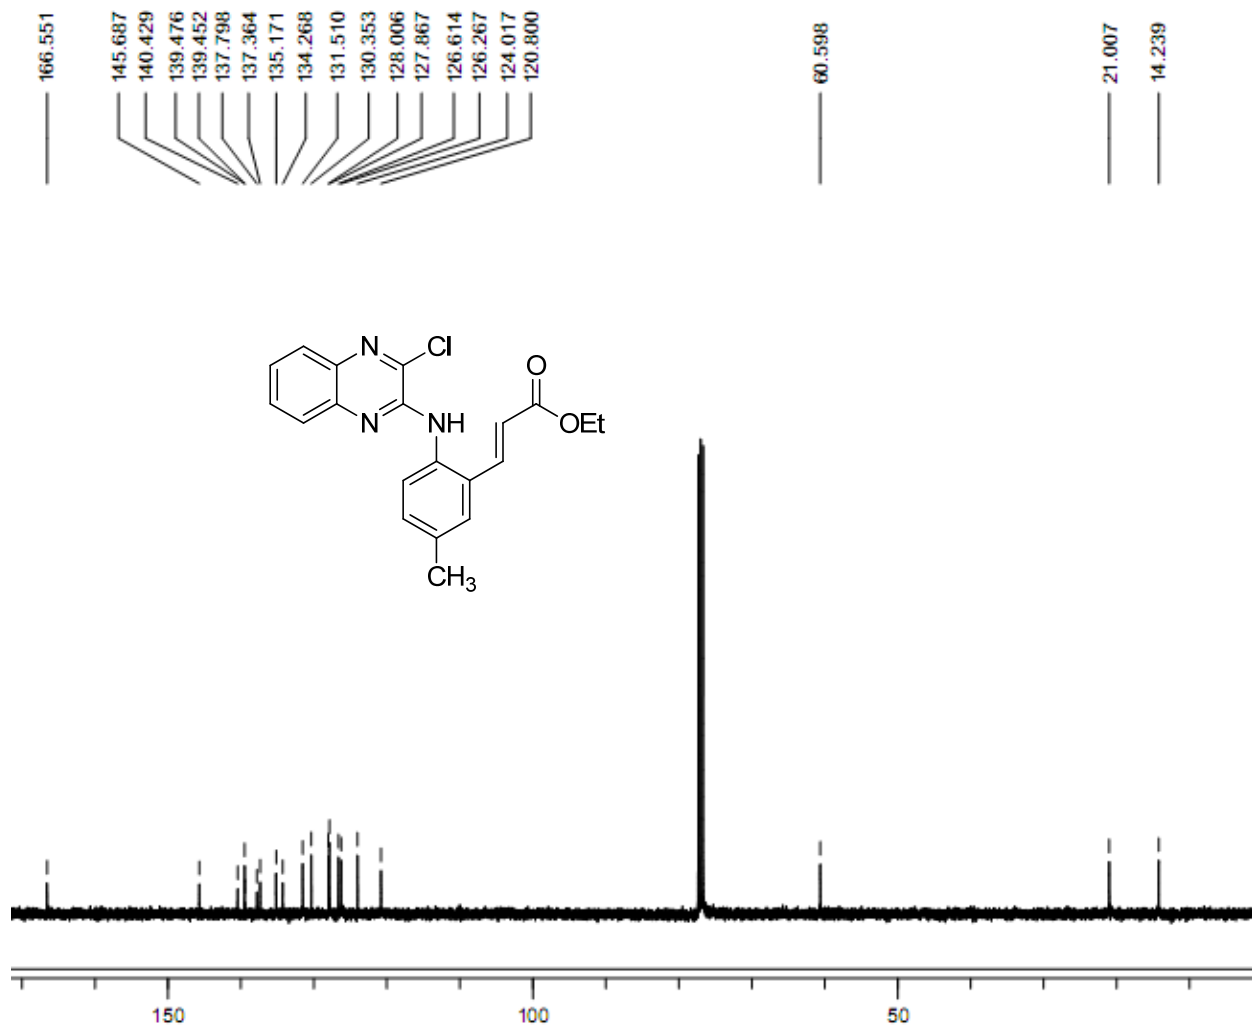

Fig. 8:  $^{13}\text{C}$  NMR spectra of compound **5d** ( $\text{CDCl}_3$ , 100 MHz)



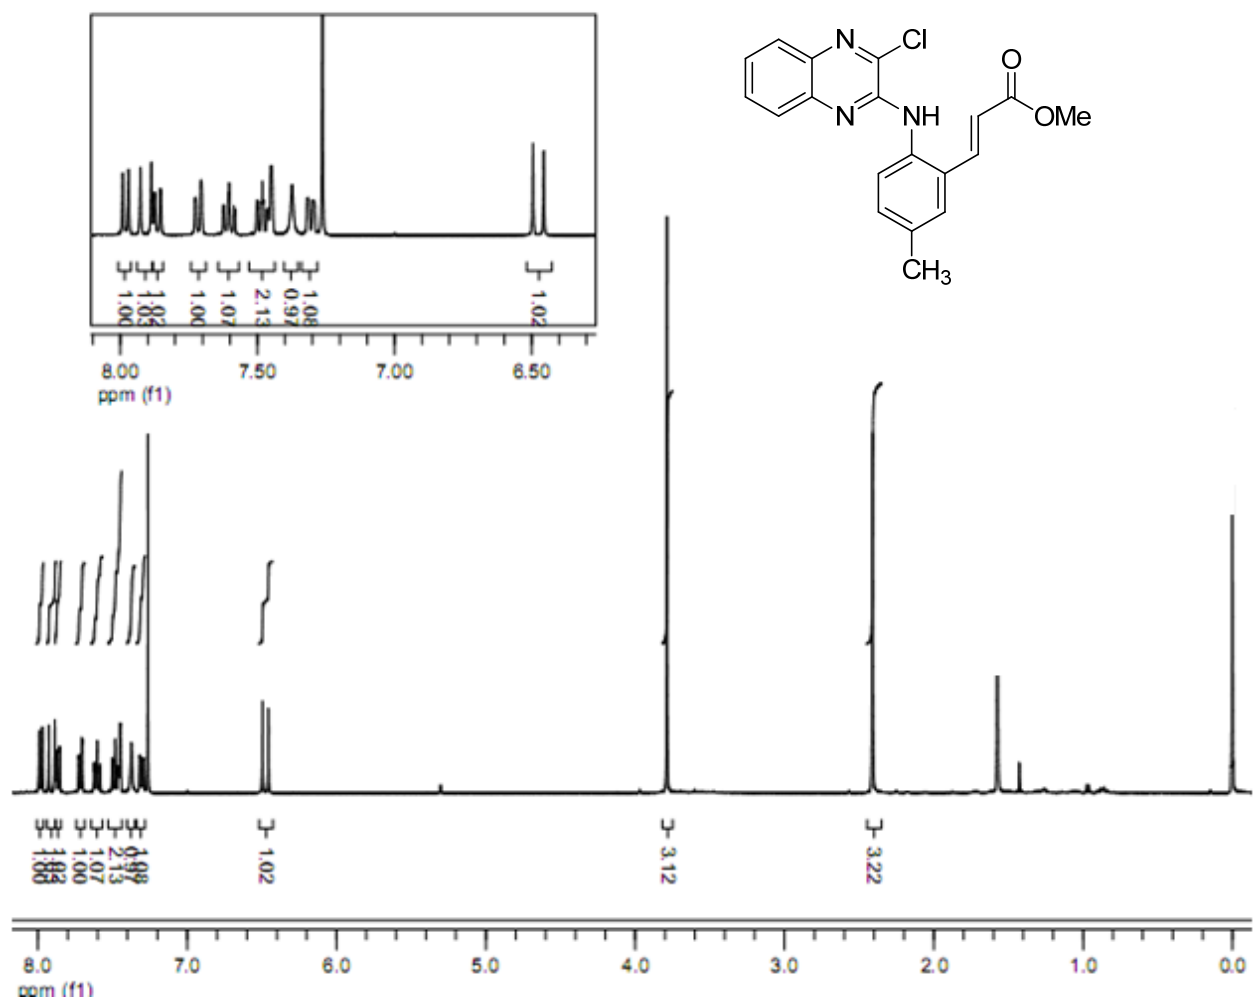

Fig. 9: <sup>1</sup>H NMR spectra of compound **5e** (CDCl<sub>3</sub>, 400 MHz)

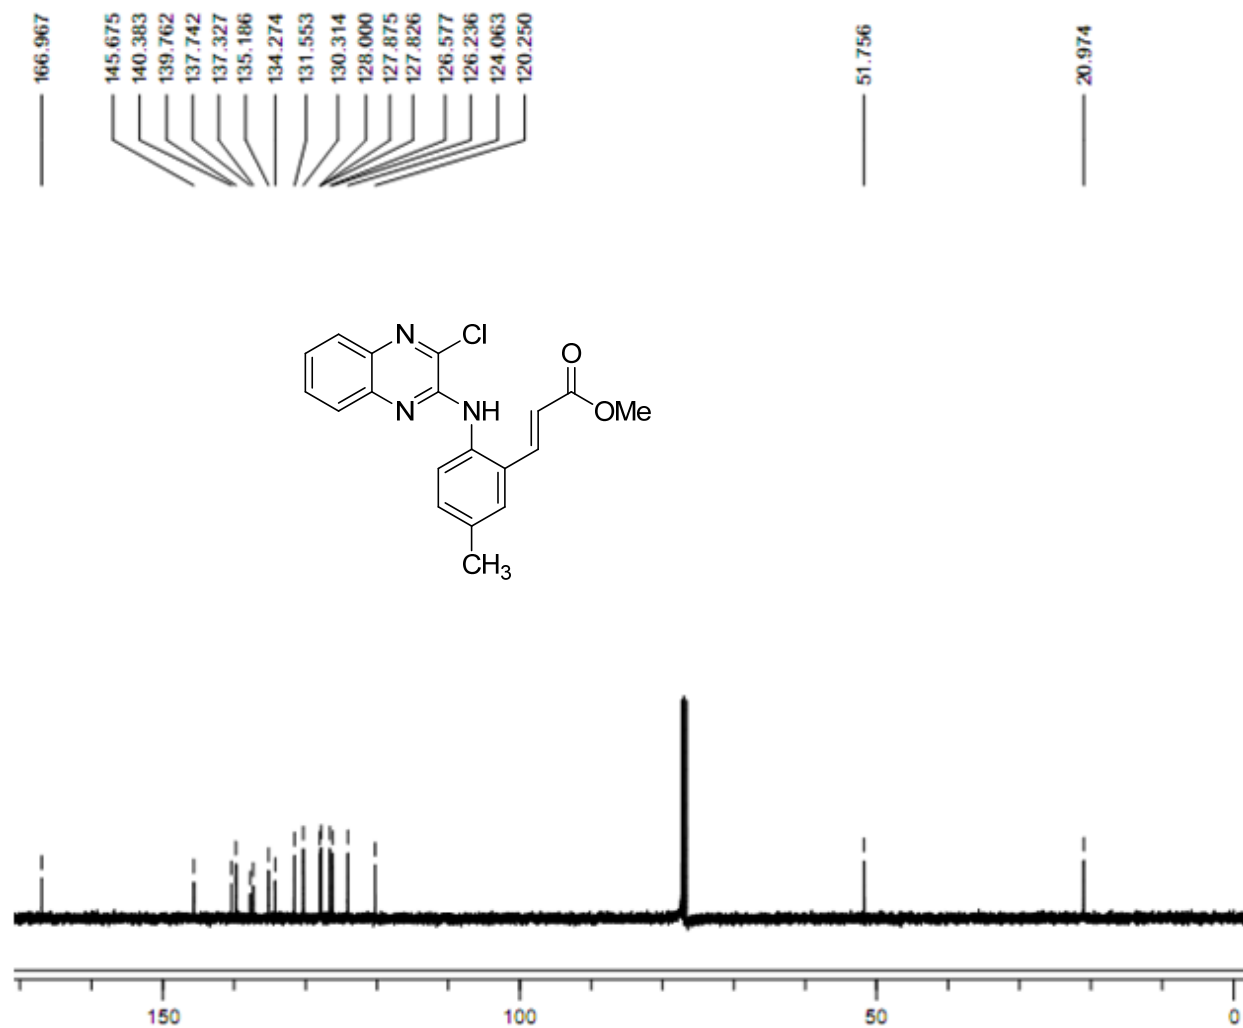

Fig. 10: <sup>13</sup>C NMR spectra of compound **5e** (CDCl<sub>3</sub>, 100 MHz)

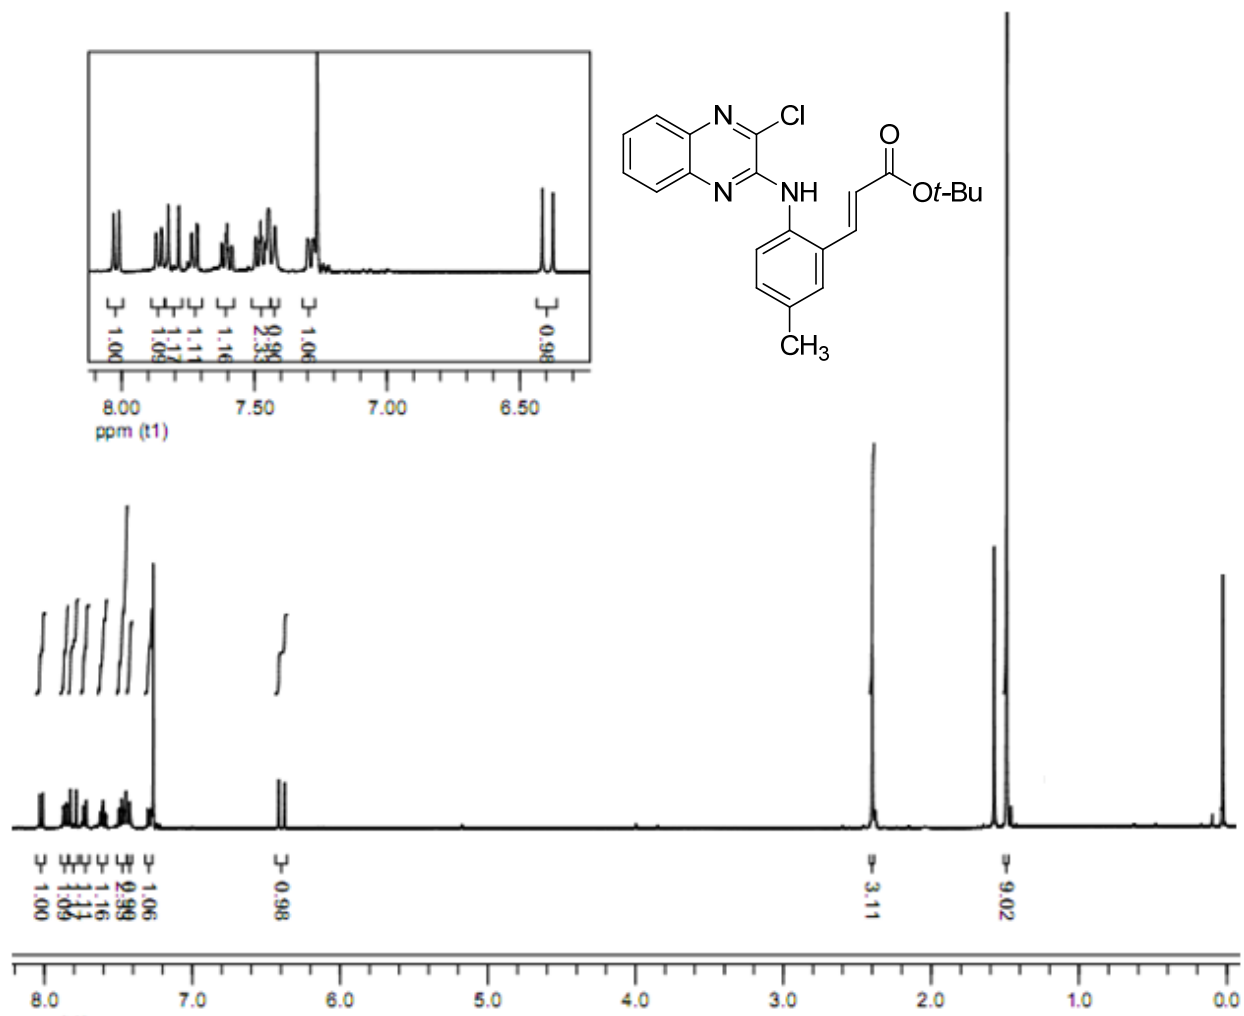

Fig. 11:  $^1\text{H}$  NMR spectra of compound **5f** ( $\text{CDCl}_3$ , 400 MHz)

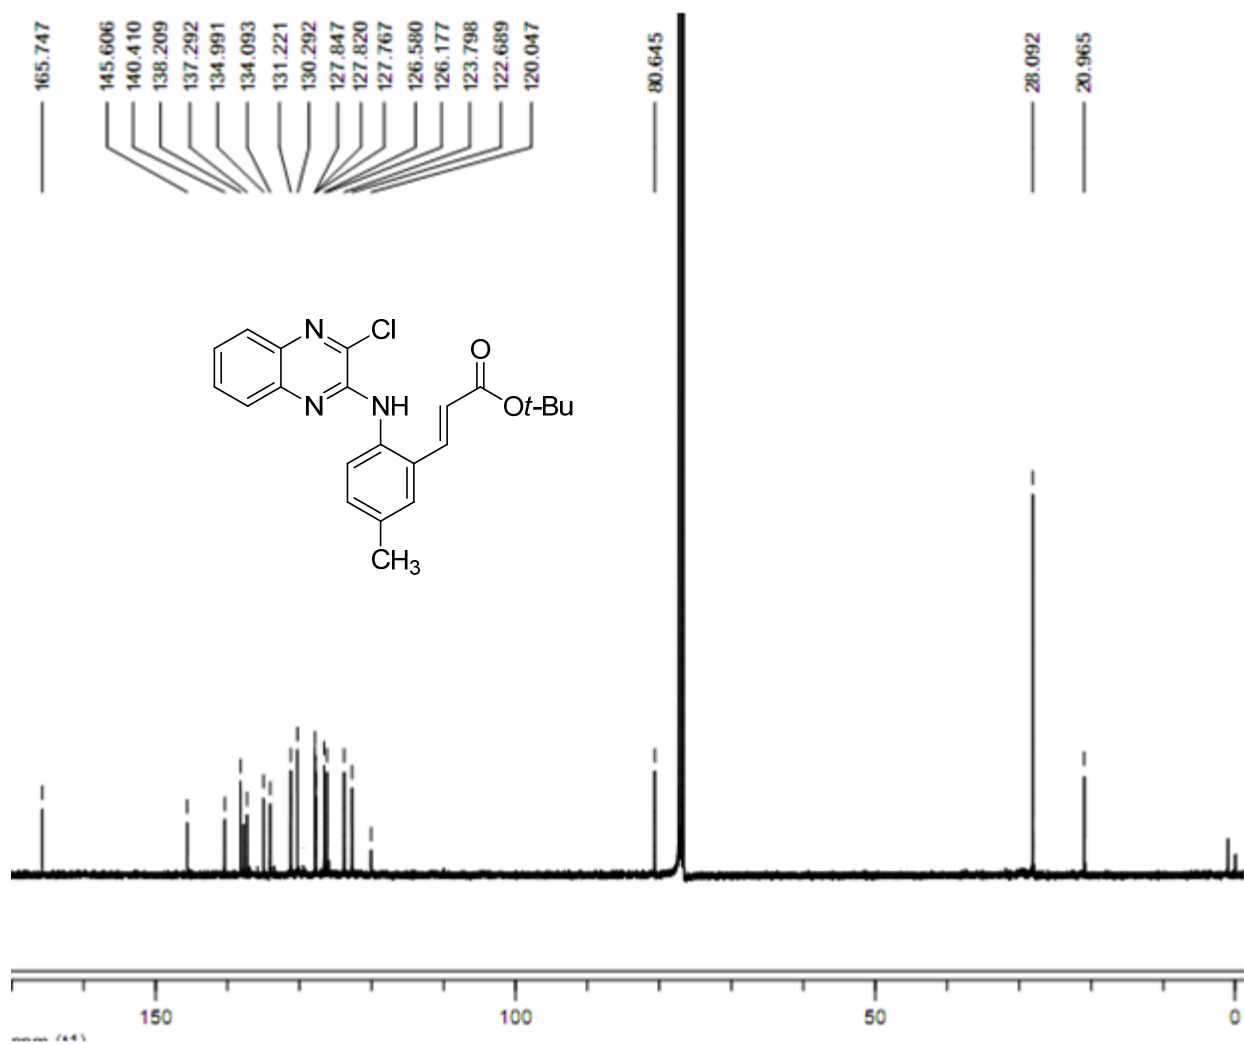

Fig. 12:  $^{13}\text{C}$  NMR spectra of compound **5f** ( $\text{CDCl}_3$ , 100 MHz)

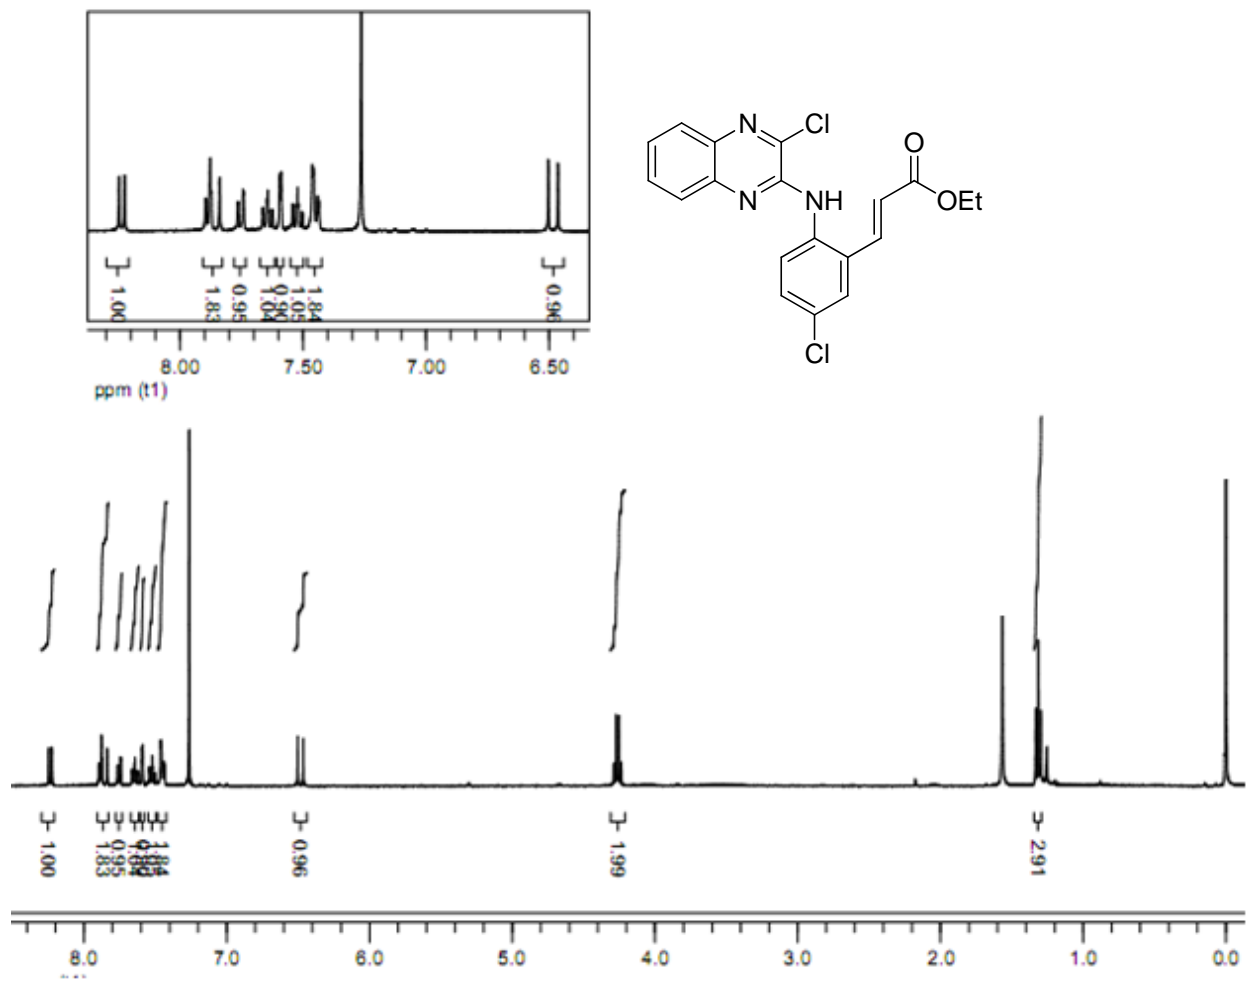

Fig. 13: <sup>1</sup>H NMR spectra of compound **5g** (CDCl<sub>3</sub>, 400 MHz)

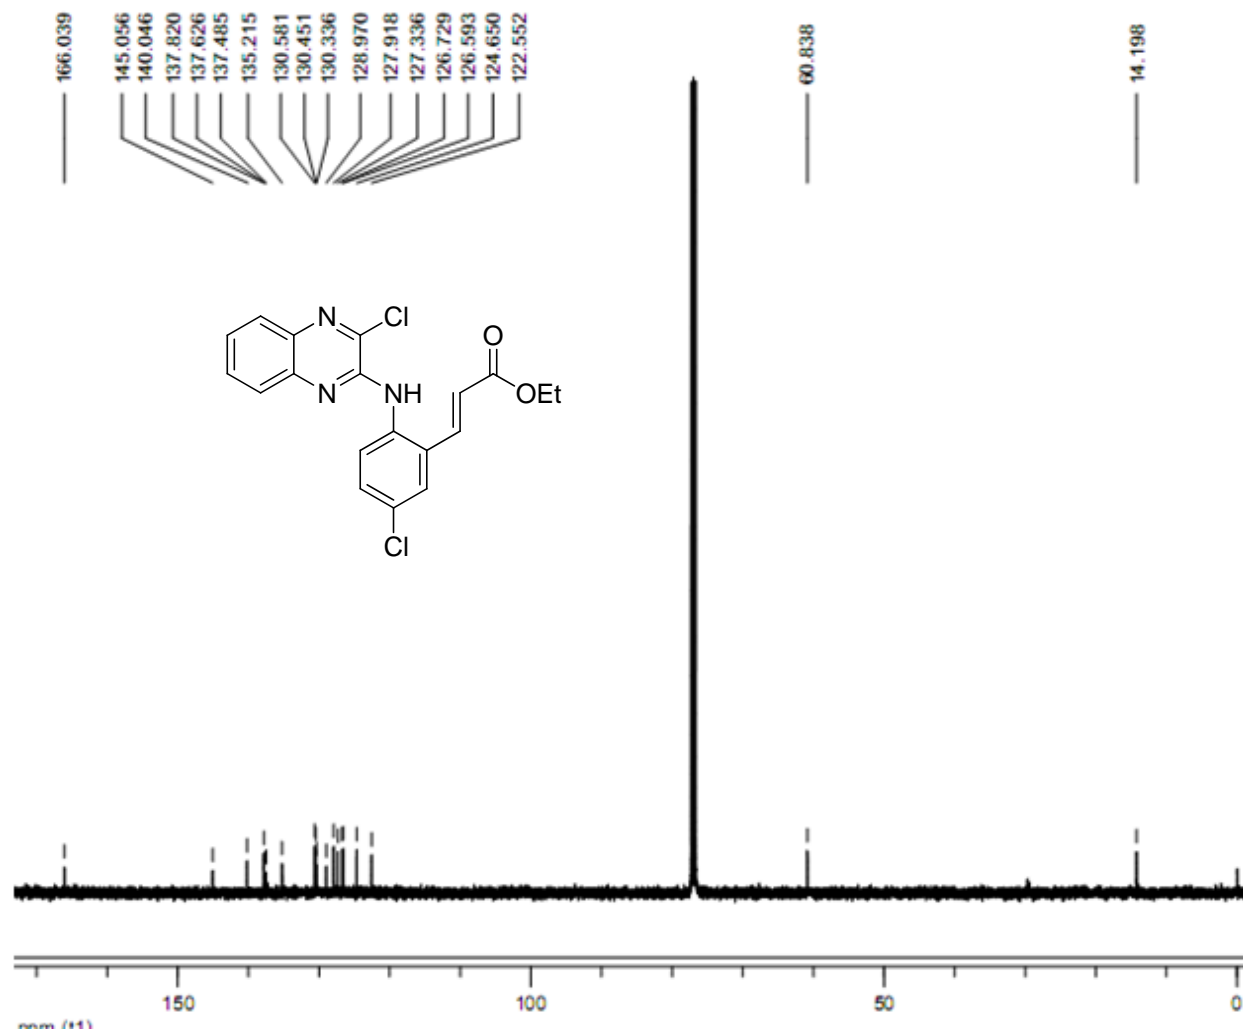

Fig. 14:  $^{13}\text{C}$  NMR spectra of compound **5g** ( $\text{CDCl}_3$ , 100 MHz)

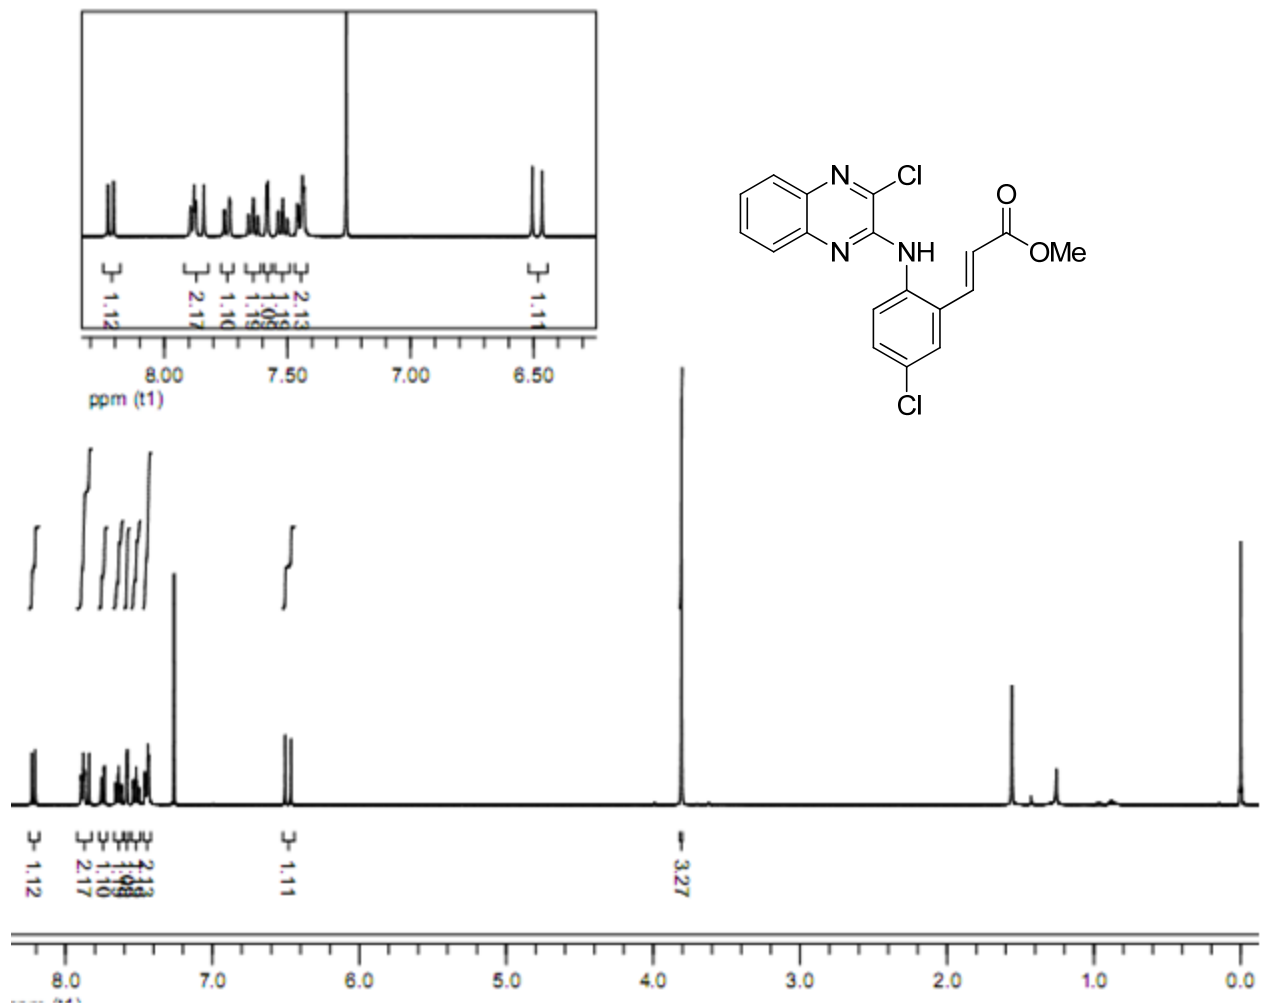

Fig. 15: <sup>1</sup>H NMR spectra of compound **5h** (CDCl<sub>3</sub>, 400 MHz)

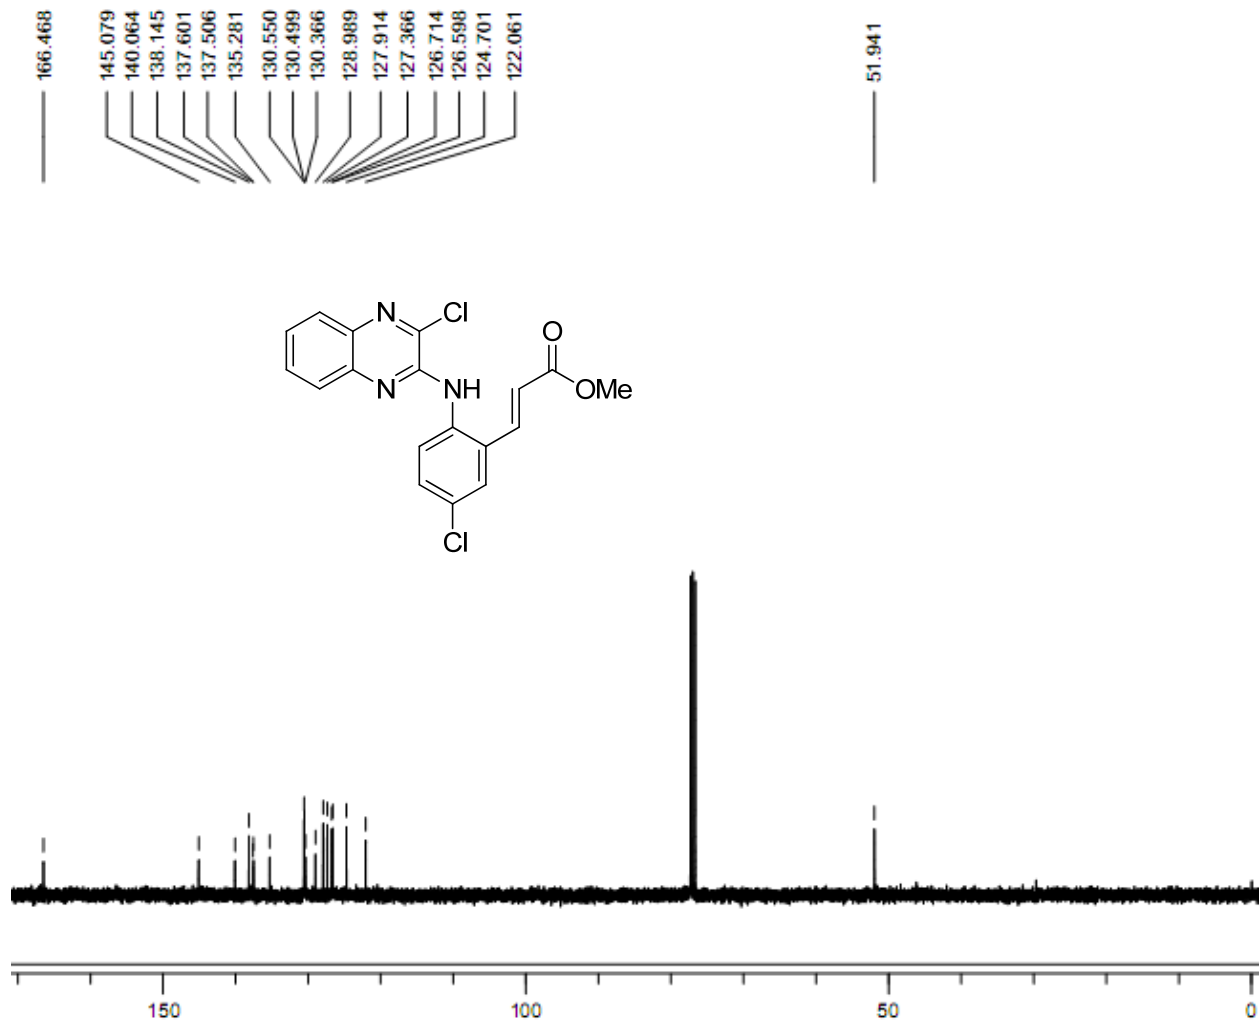

Fig. 16:  $^{13}\text{C}$  NMR spectra of compound **5h** ( $\text{CDCl}_3$ , 100 MHz)



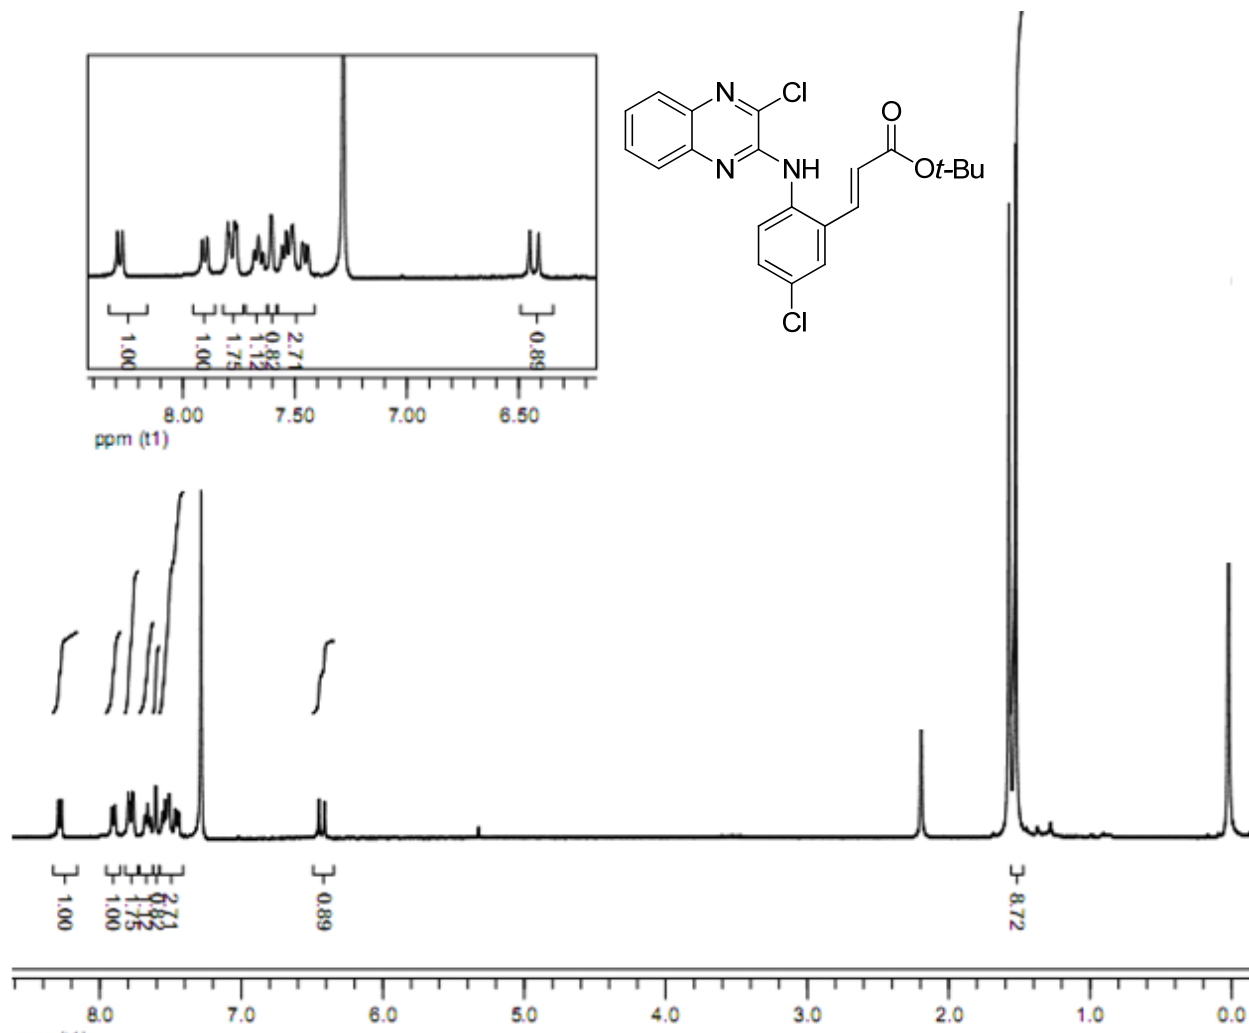

Fig. 17:  $^1\text{H}$  NMR spectra of compound **5i** ( $\text{CDCl}_3$ , 400 MHz)

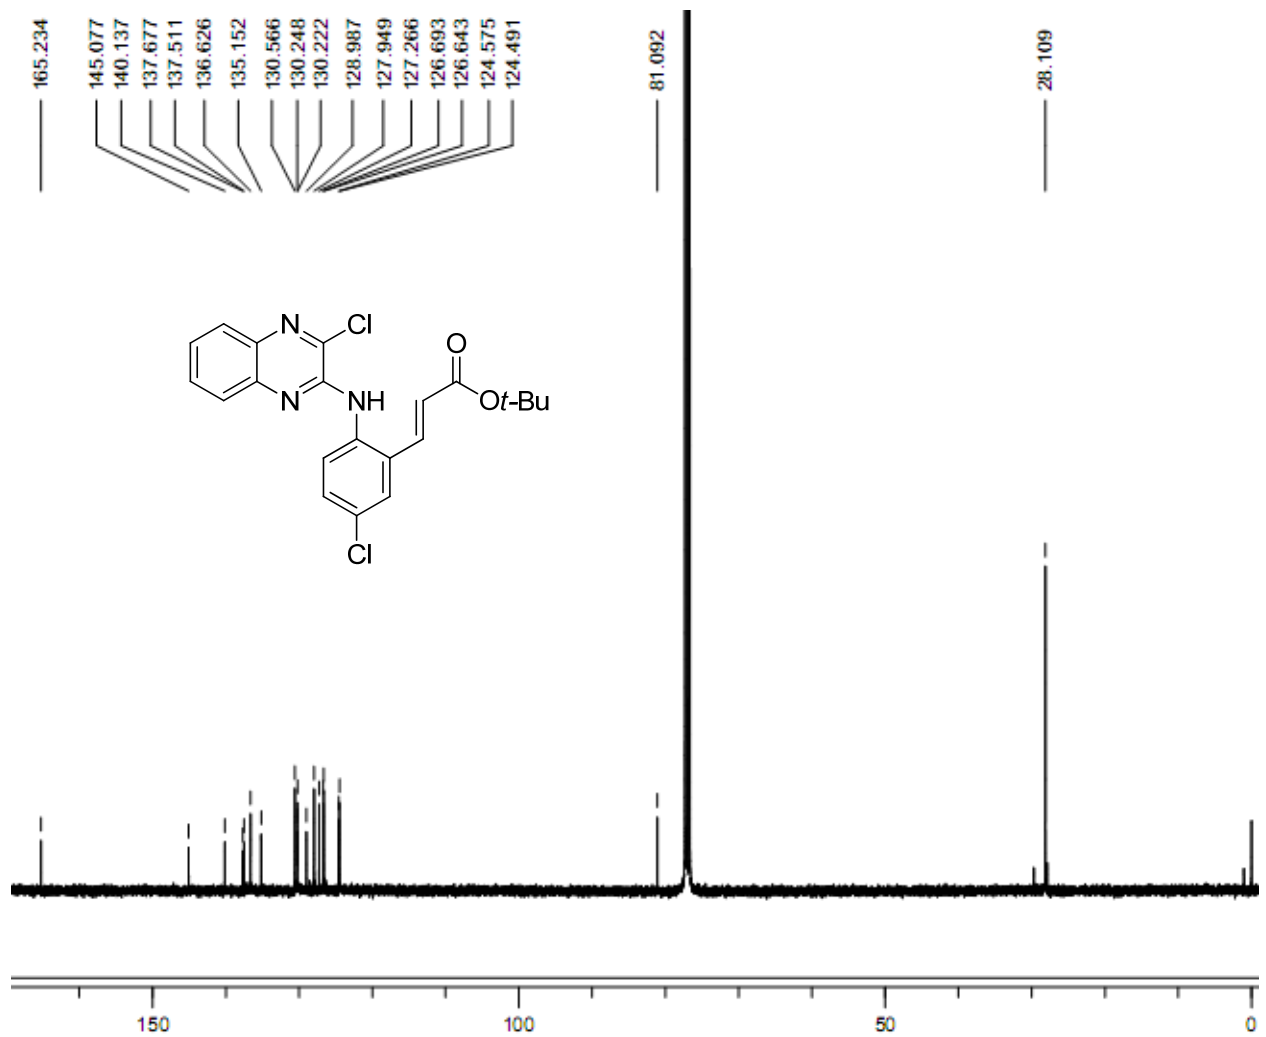

Fig. 18:  $^{13}\text{C}$  NMR spectra of compound **5i** ( $\text{CDCl}_3$ , 100 MHz)

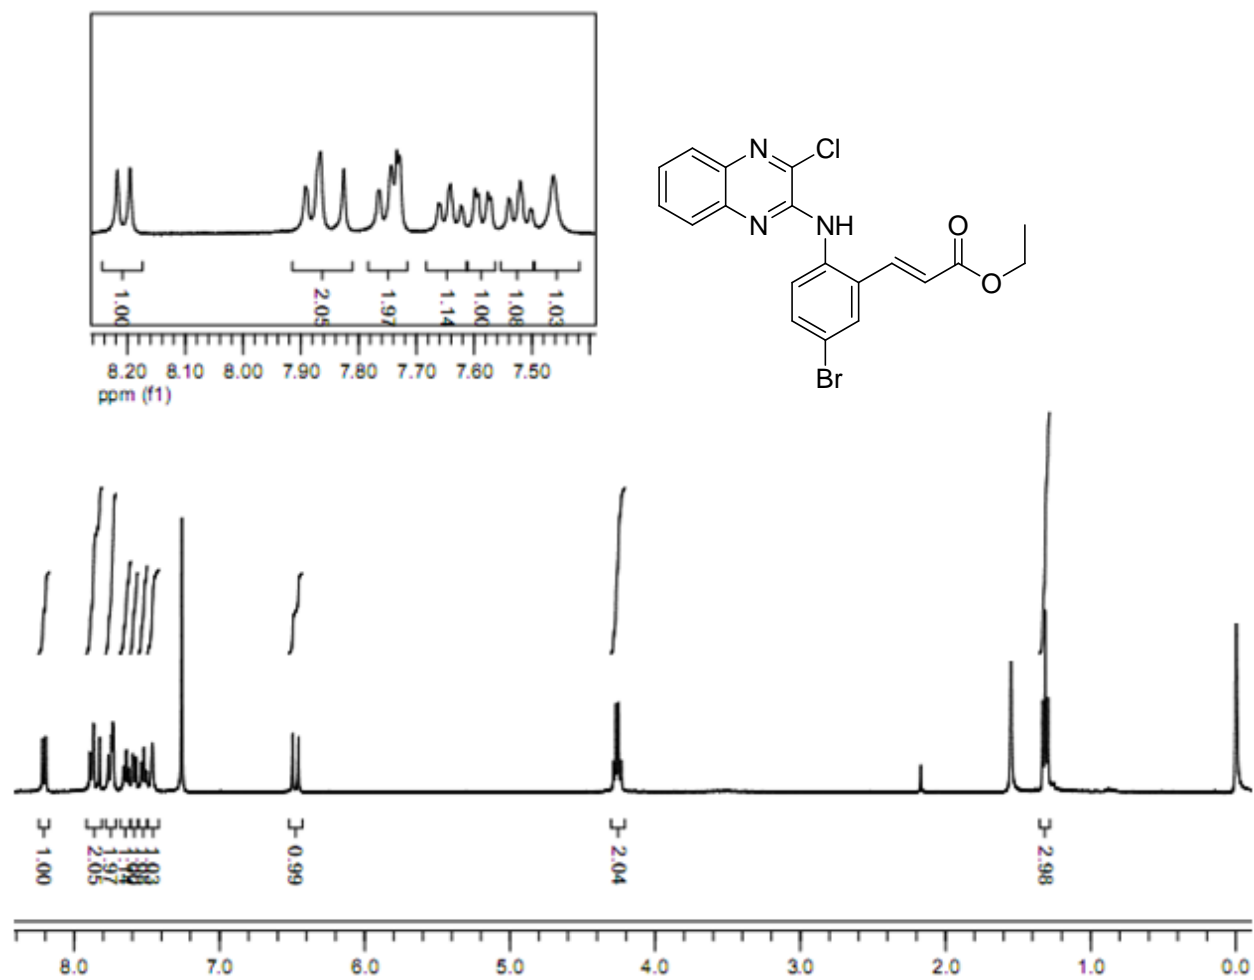

Fig. 19: <sup>1</sup>H NMR spectra of compound **5j** (CDCl<sub>3</sub>, 400 MHz)

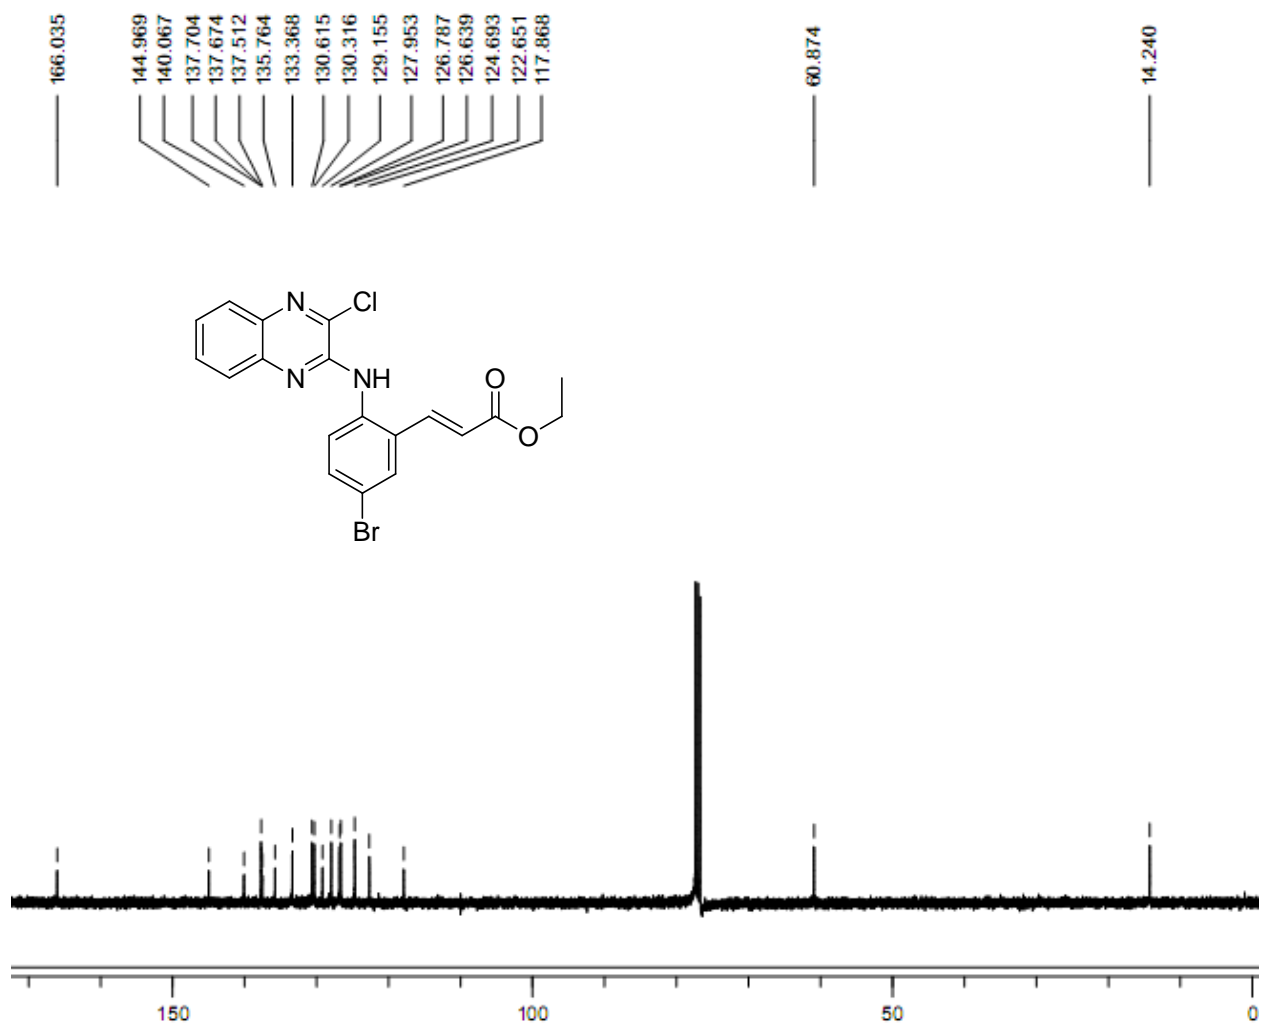

Fig. 20:  $^{13}\text{C}$  NMR spectra of compound **5j** ( $\text{CDCl}_3$ , 100 MHz)

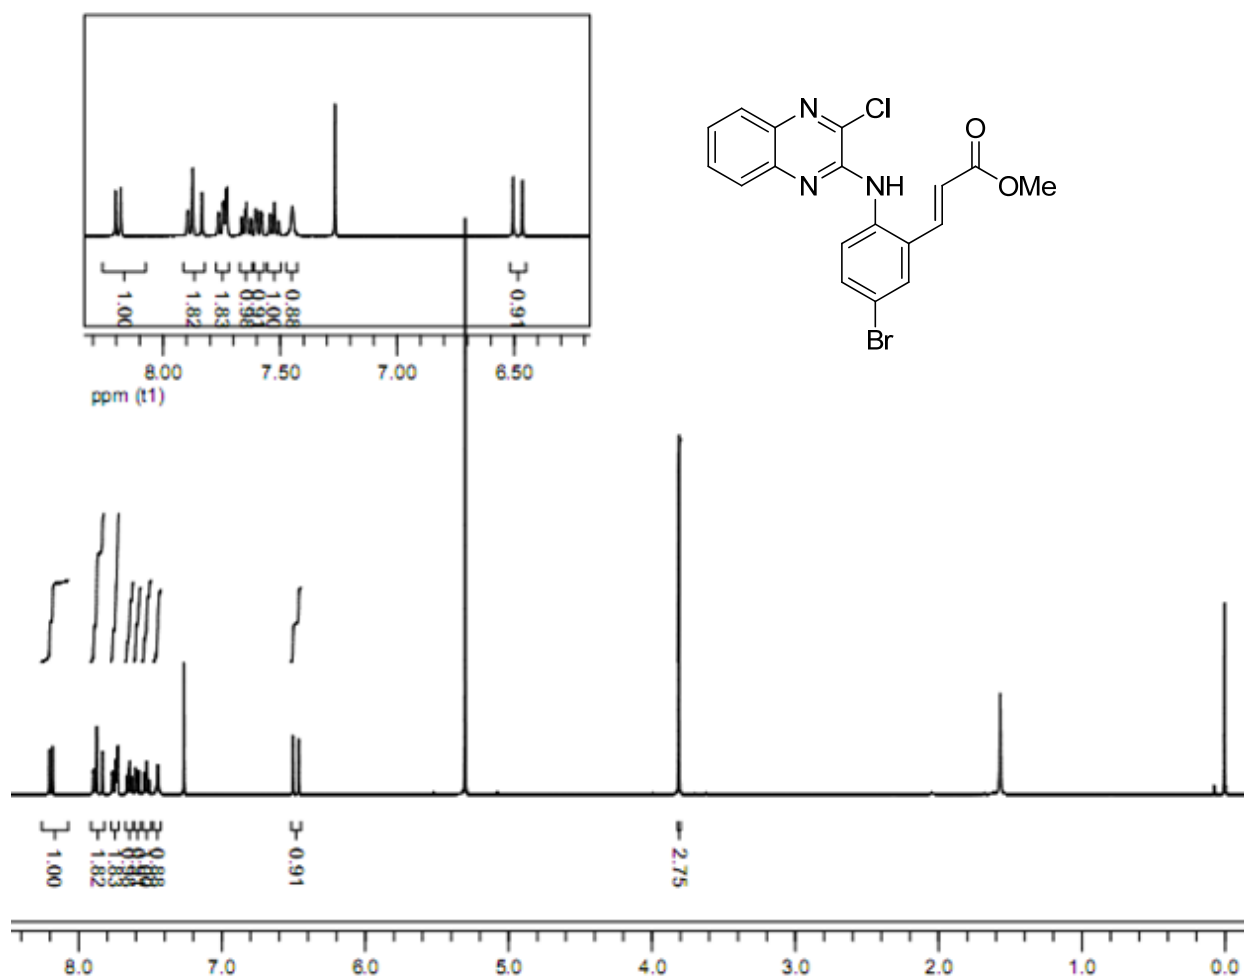

Fig. 21: <sup>1</sup>H NMR spectra of compound **5k** (CDCl<sub>3</sub>, 400 MHz)

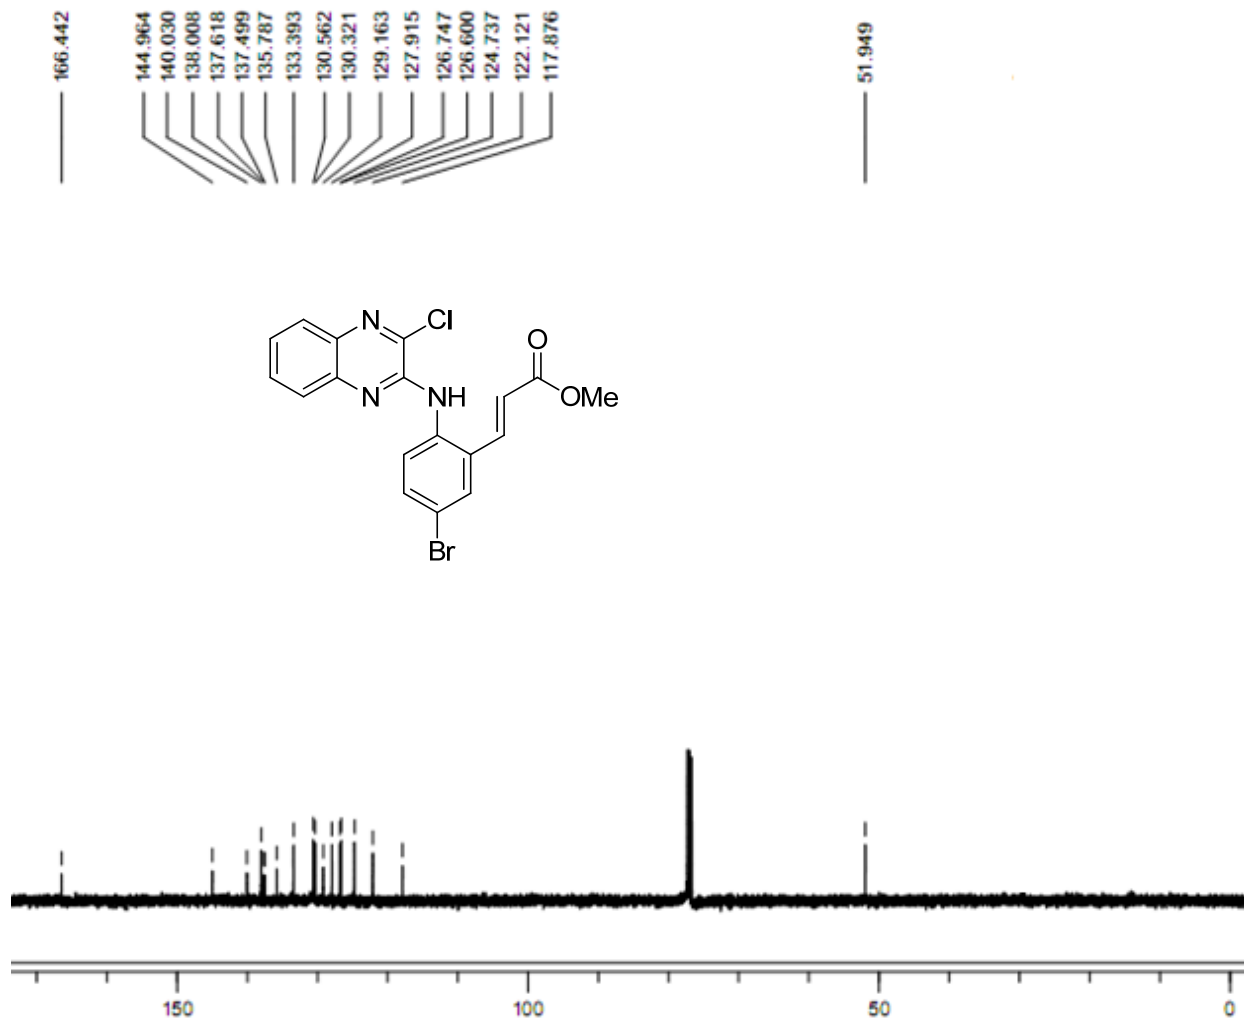

Fig. 22:  $^{13}\text{C}$  NMR spectra of compound **5k** ( $\text{CDCl}_3$ , 100 MHz)

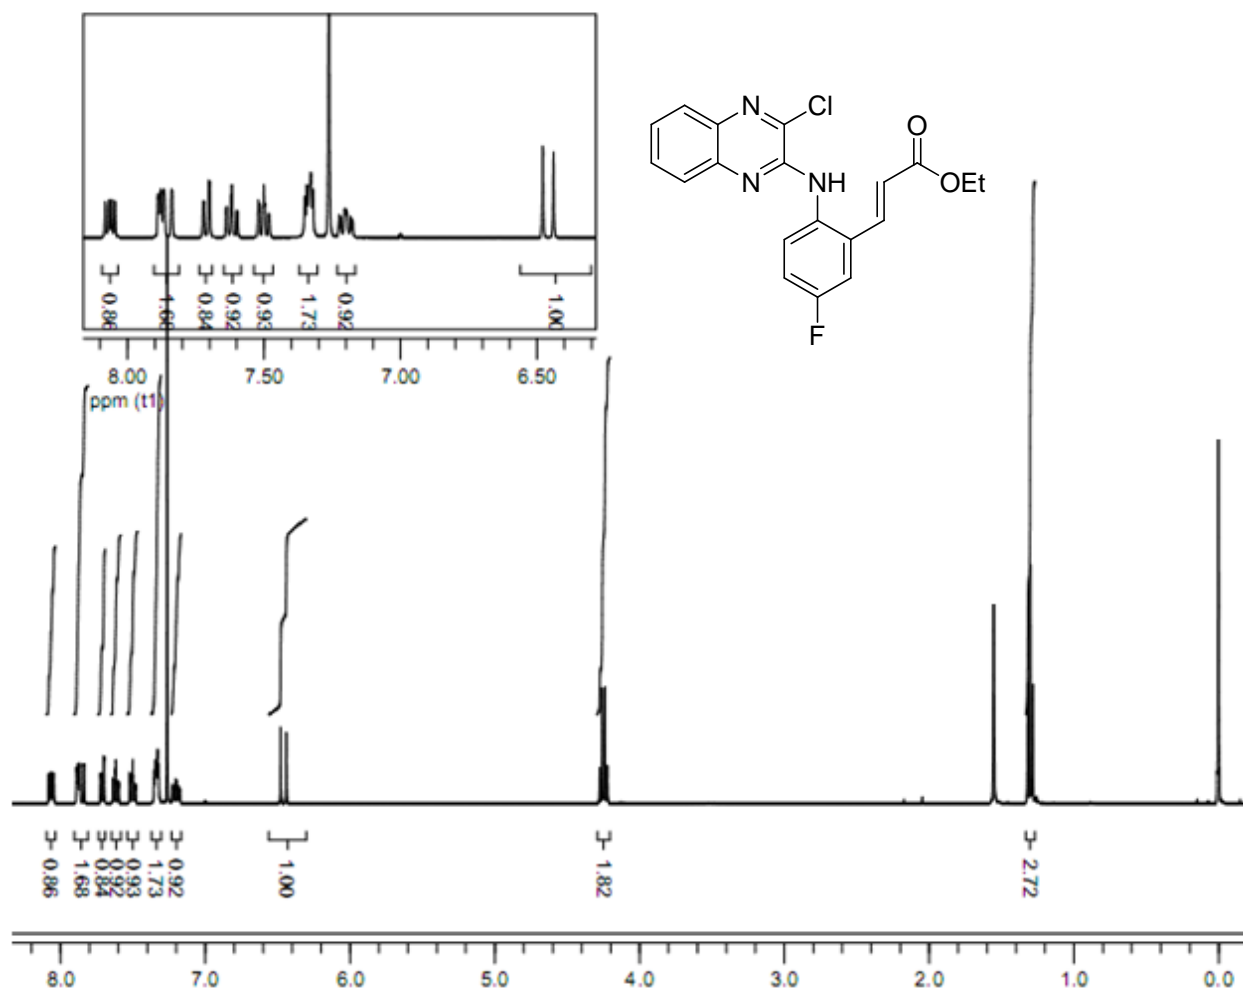

Fig. 23: <sup>1</sup>H NMR spectra of compound **5I** (CDCl<sub>3</sub>, 400 MHz)

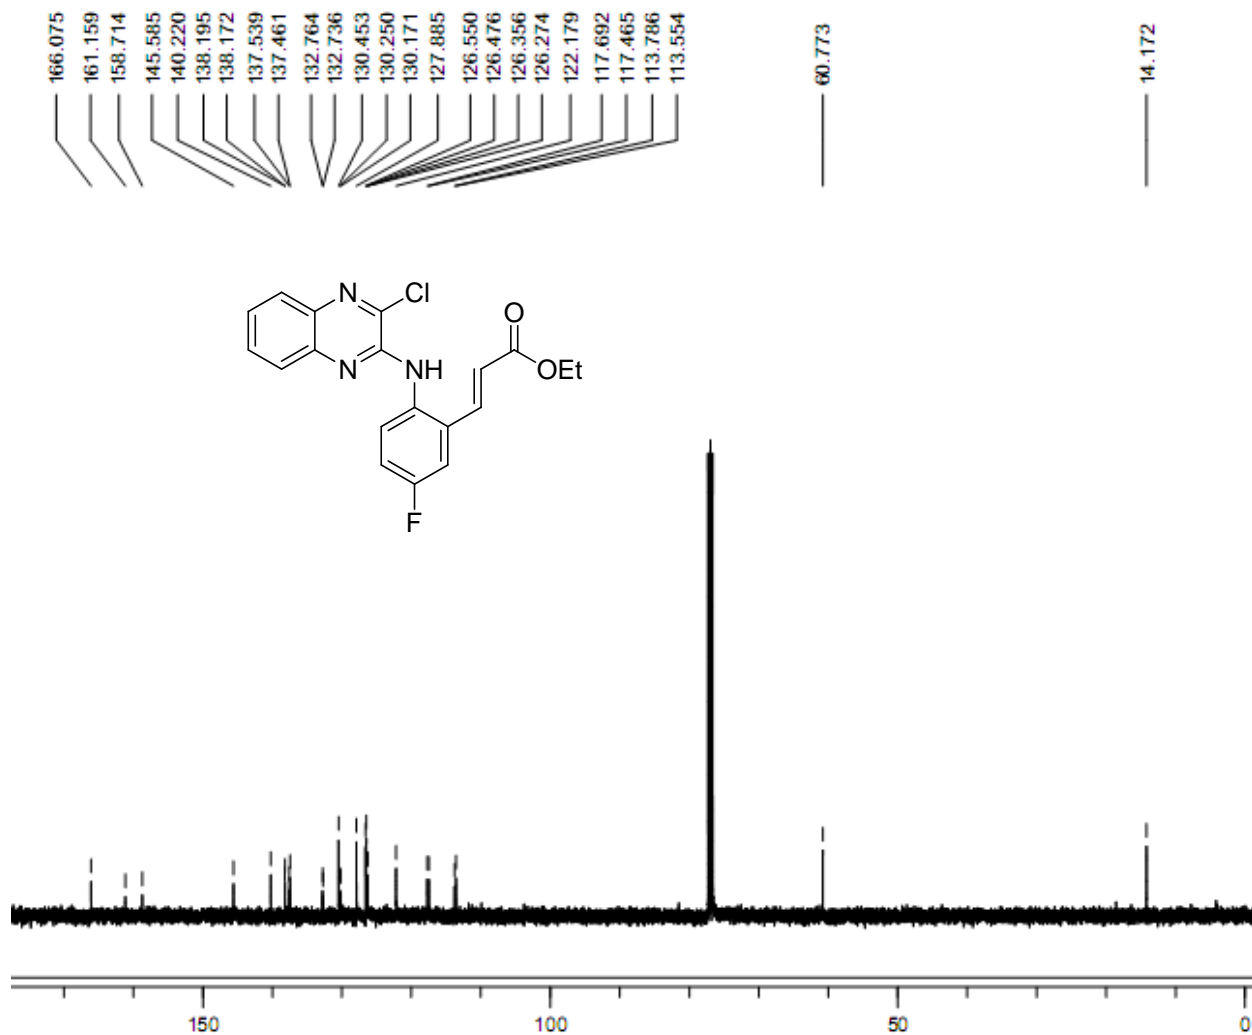

Fig. 24:  $^{13}\text{C}$  NMR spectra of compound **51** ( $\text{CDCl}_3$ , 100 MHz)



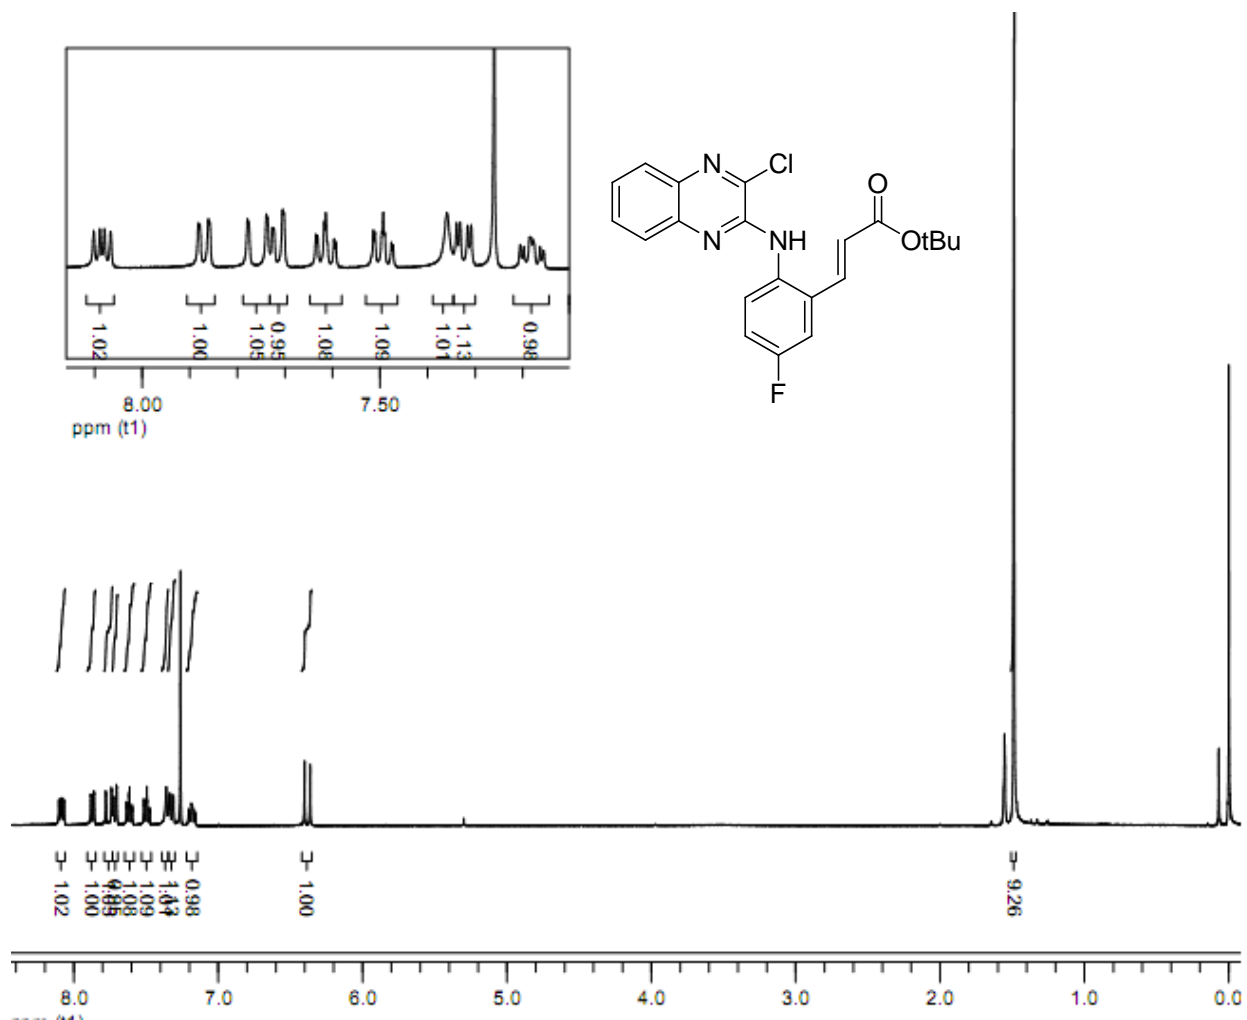

Fig. 25: <sup>1</sup>H NMR spectra of compound **5m** (CDCl<sub>3</sub>, 400 MHz)

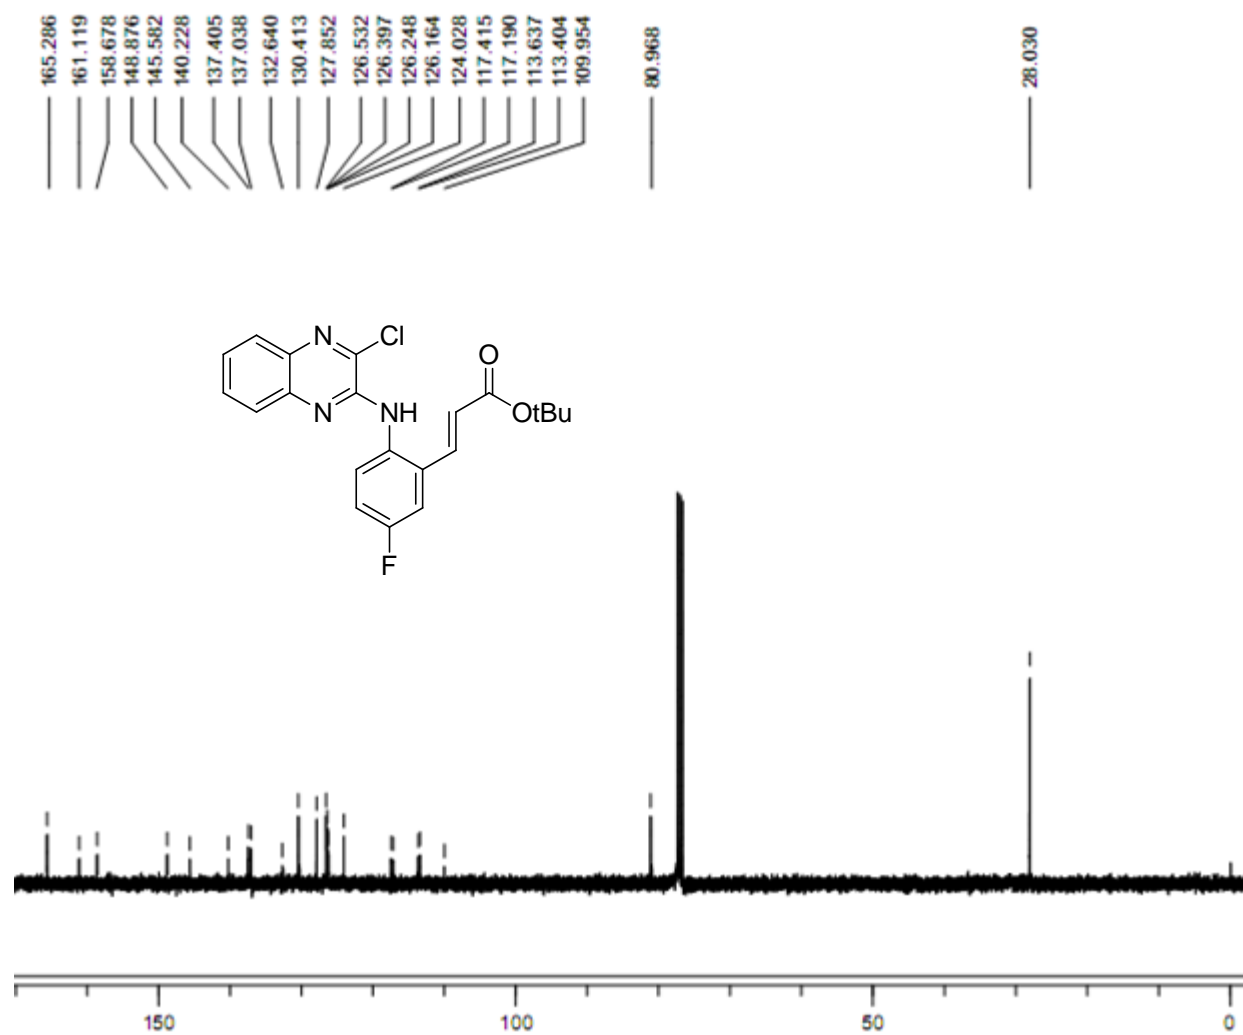

Fig. 26: <sup>13</sup>C NMR spectra of compound **5m** (CDCl<sub>3</sub>, 100 MHz)

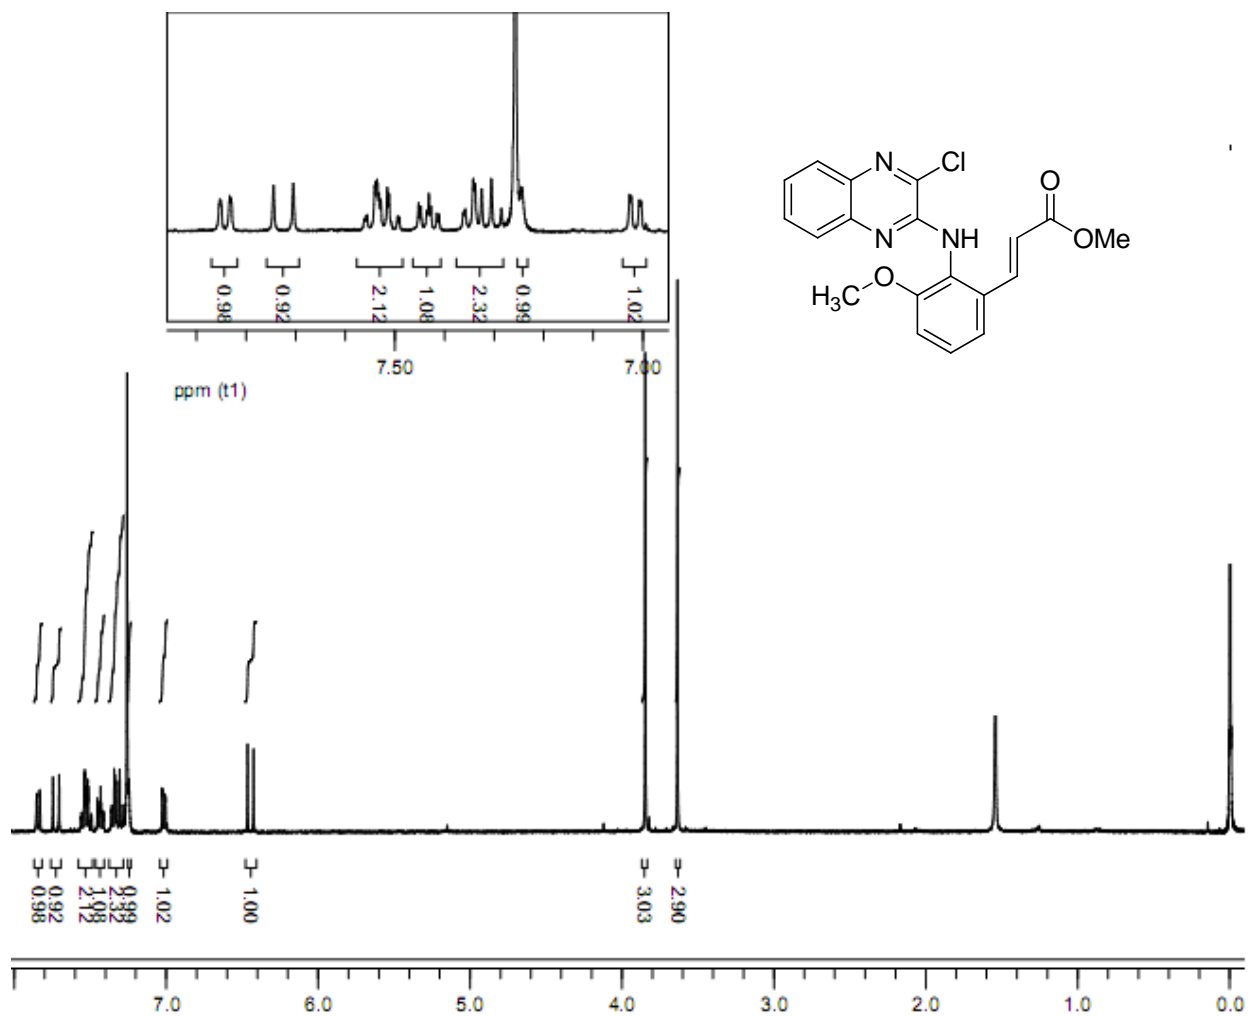

Fig. 27: <sup>1</sup>H NMR spectra of compound **5n** (CDCl<sub>3</sub>, 400 MHz)

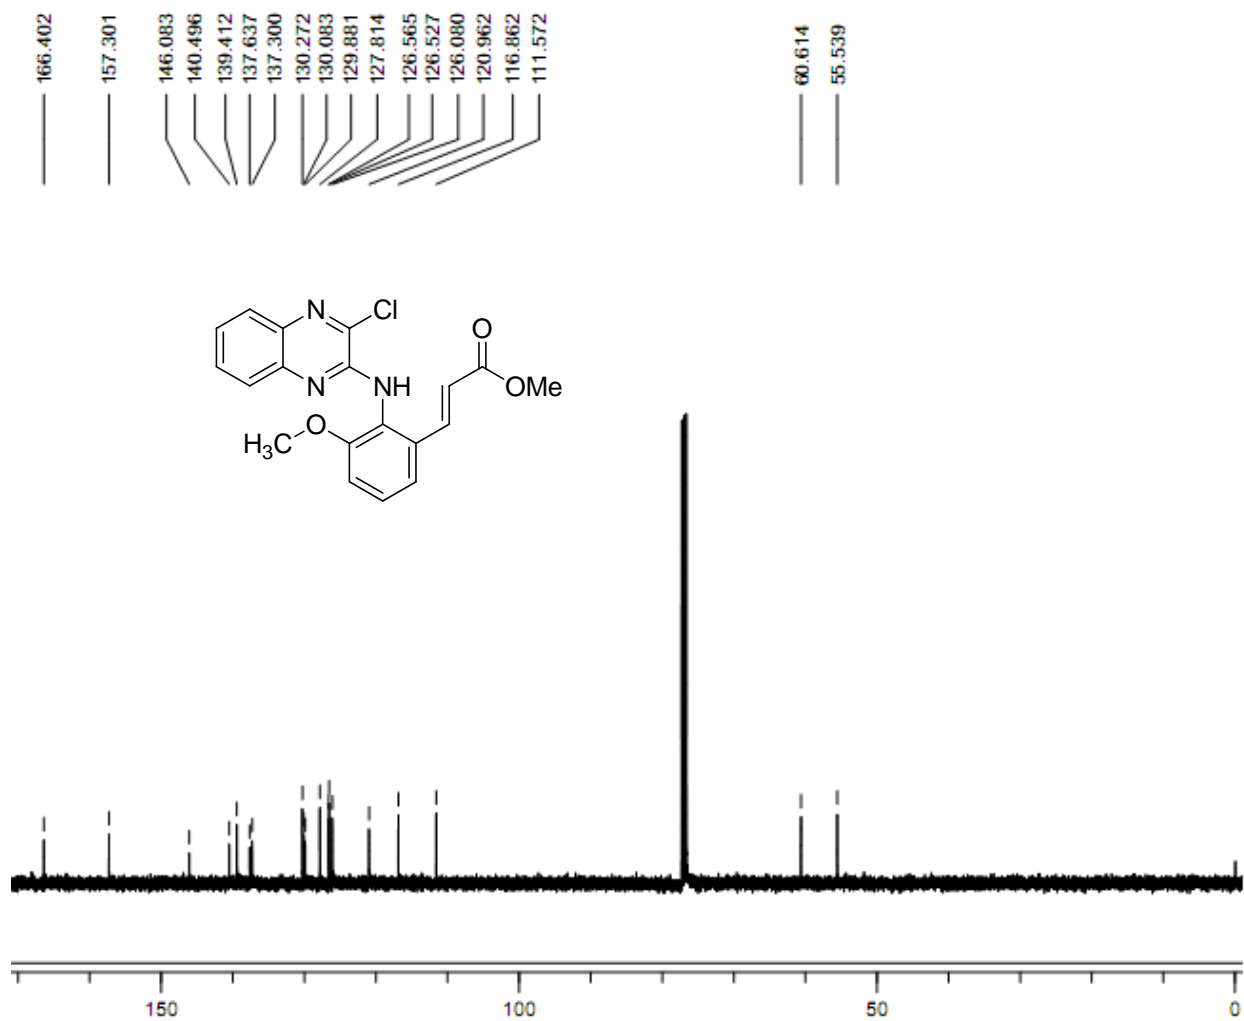

Fig. 28:  $^{13}\text{C}$  NMR spectra of compound **5n** ( $\text{CDCl}_3$ , 100 MHz)

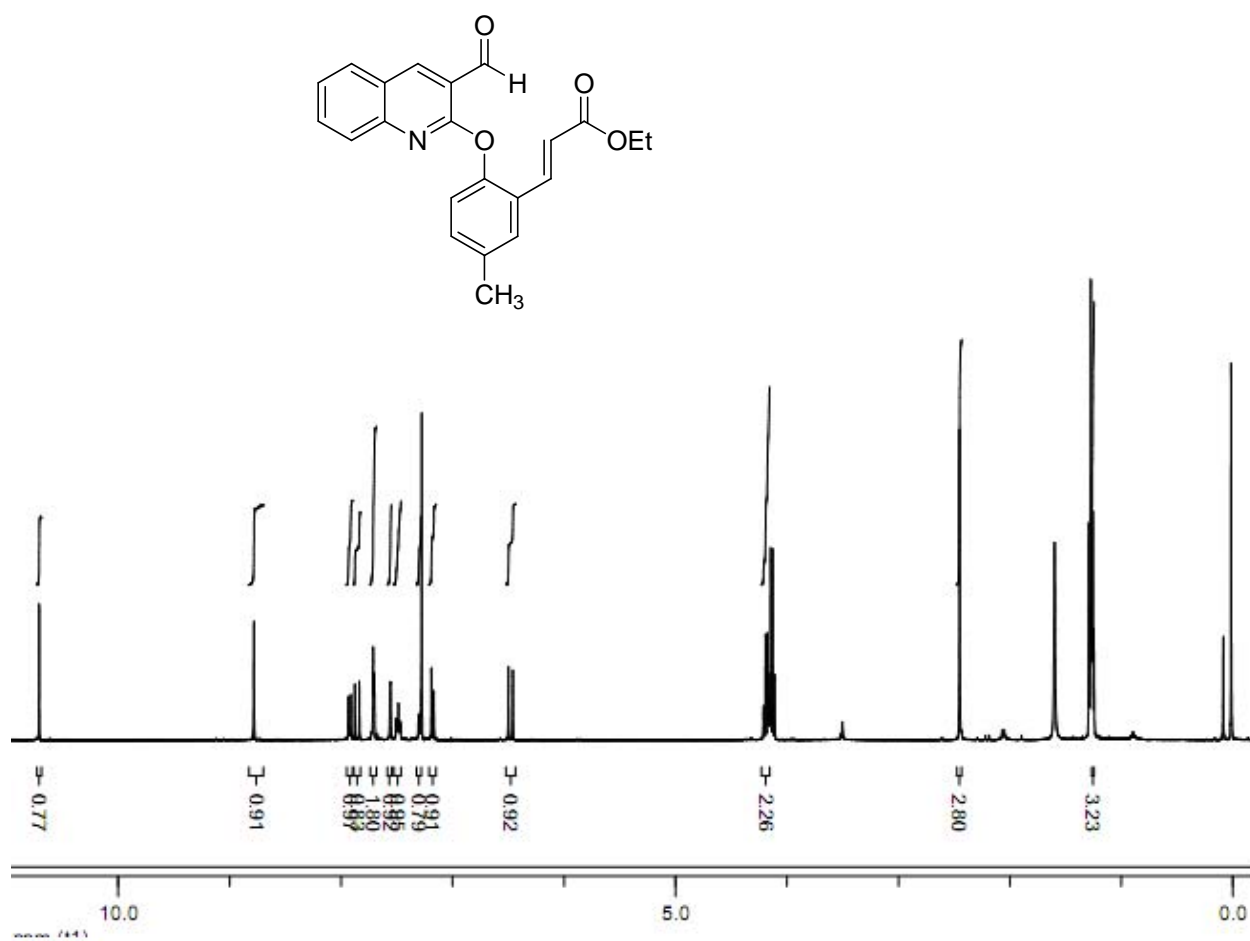

Fig. 29:  $^1\text{H}$  NMR spectra of compound **5o** ( $\text{CDCl}_3$ , 400 MHz)

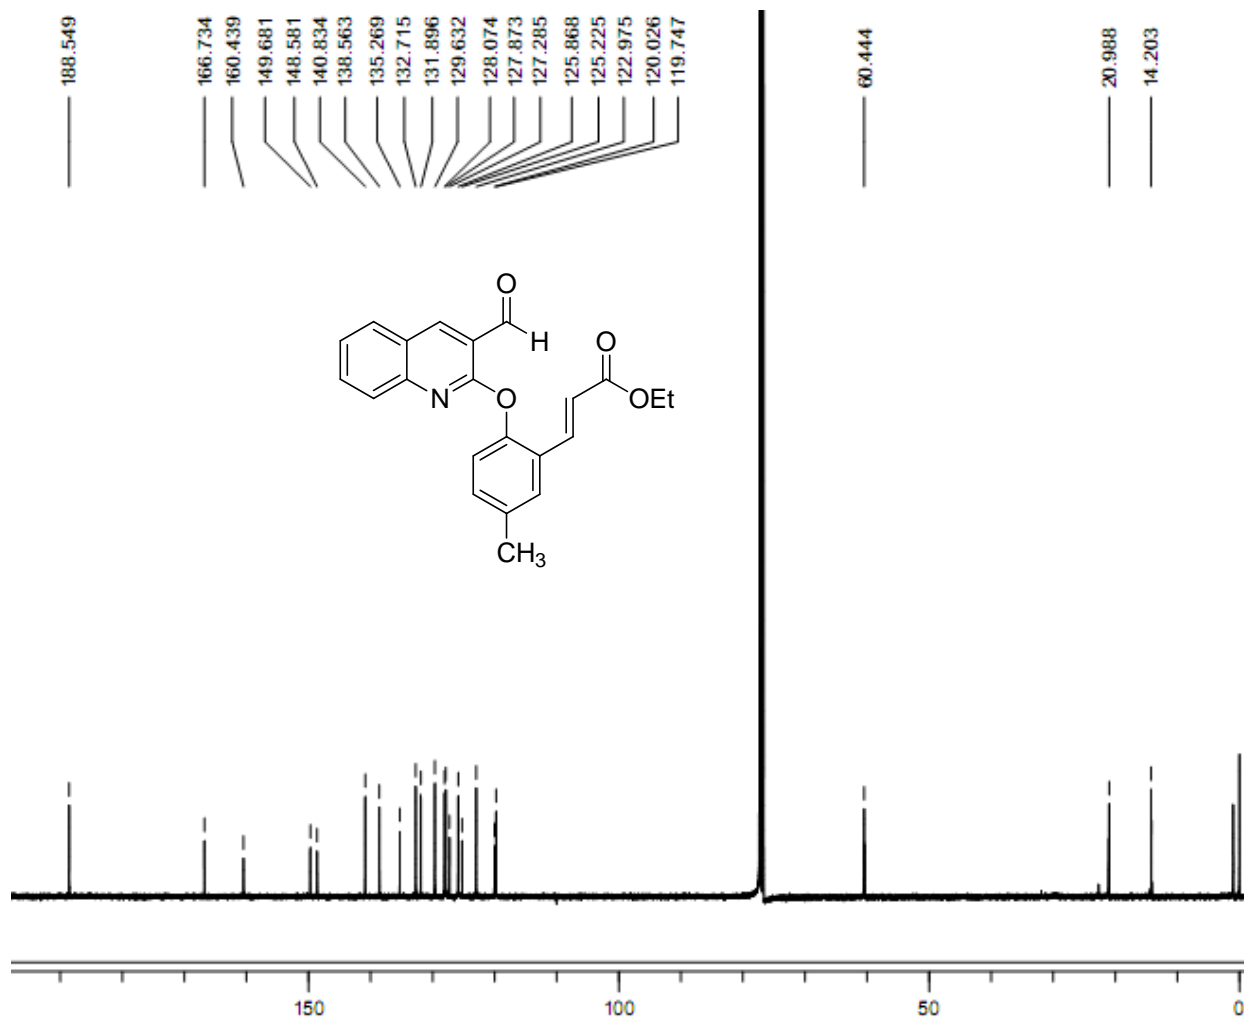

Fig. 30:  $^{13}\text{C}$  NMR spectra of compound **5o** ( $\text{CDCl}_3$ , 100 MHz)

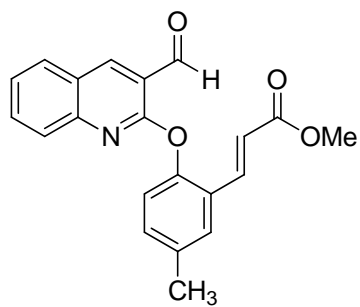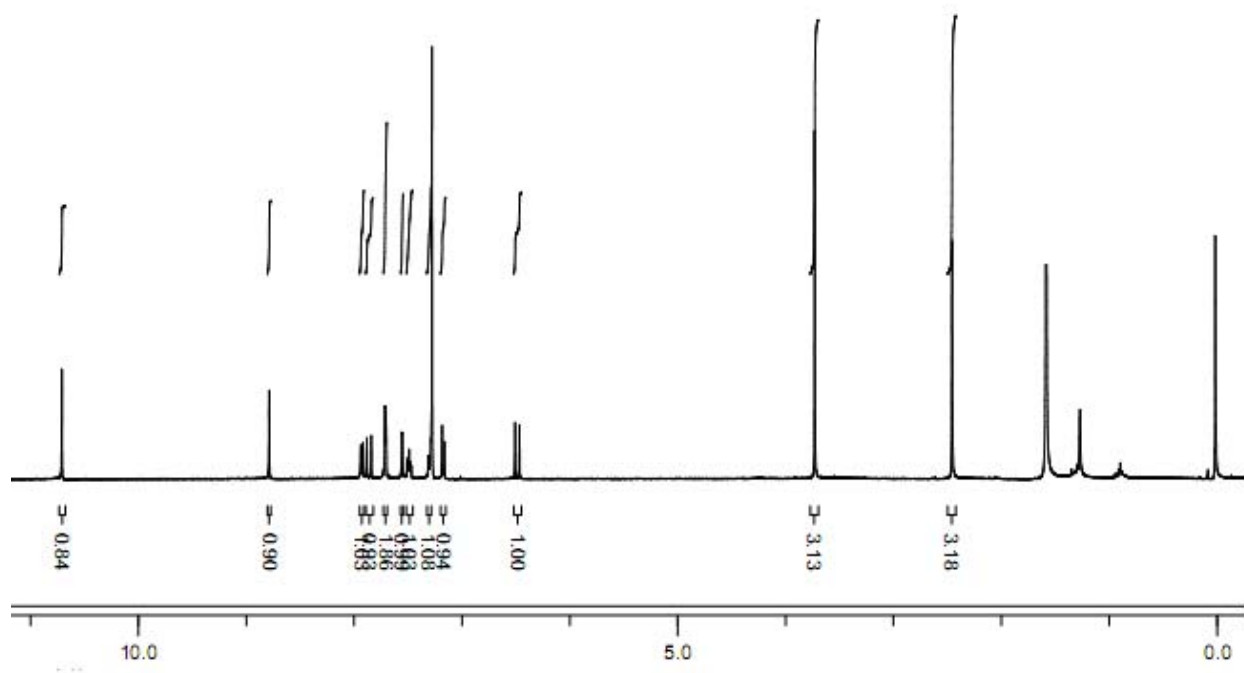

Fig. 31:  $^1\text{H}$  NMR spectra of compound **5p** (CDCl<sub>3</sub>, 400 MHz)

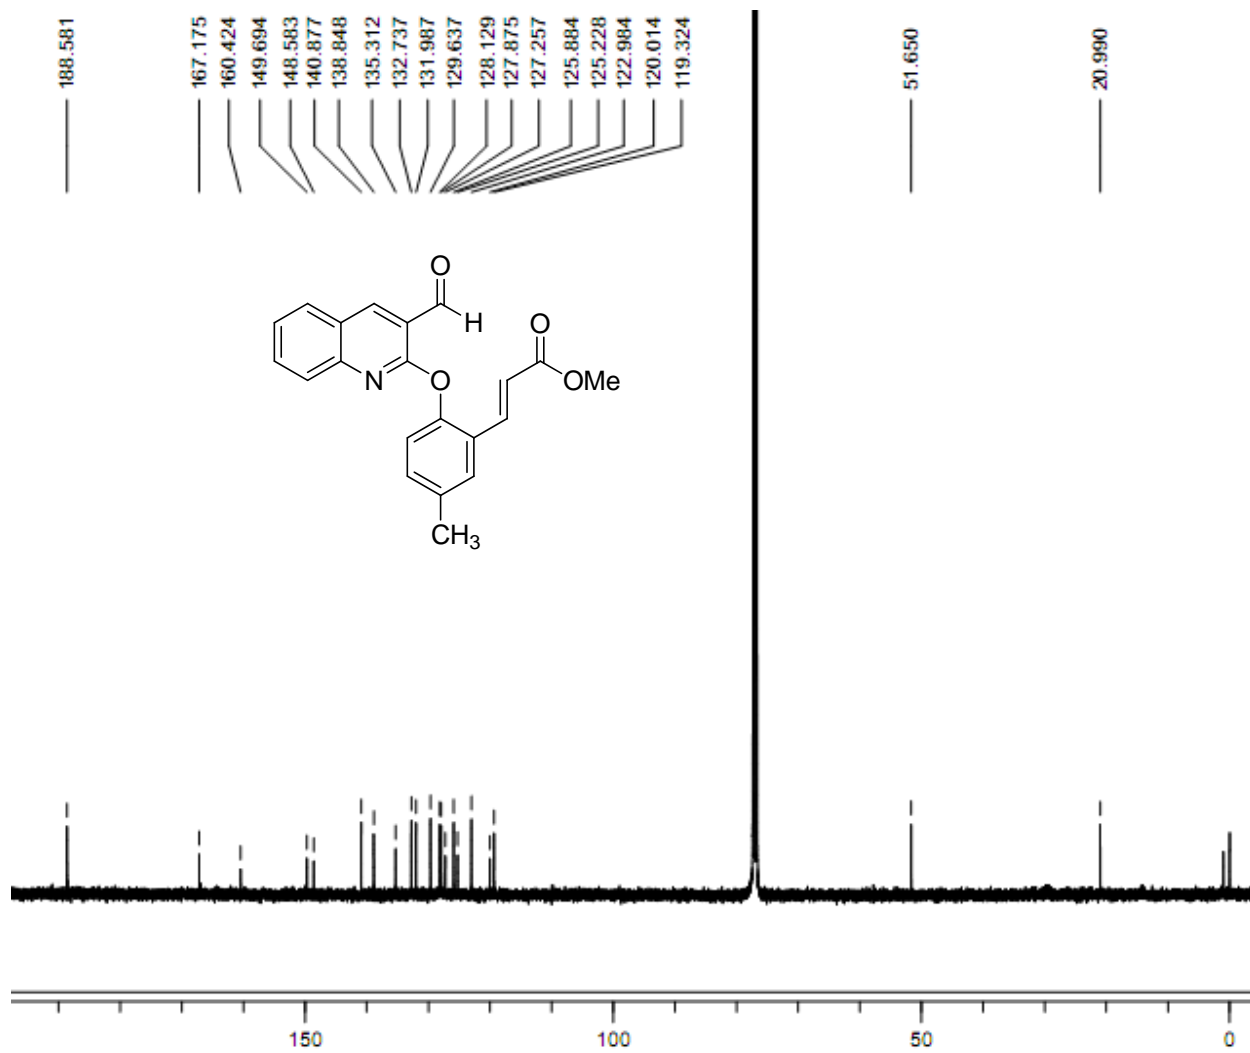

Fig. 32:  $^{13}\text{C}$  NMR spectra of compound **5p** ( $\text{CDCl}_3$ , 100 MHz)



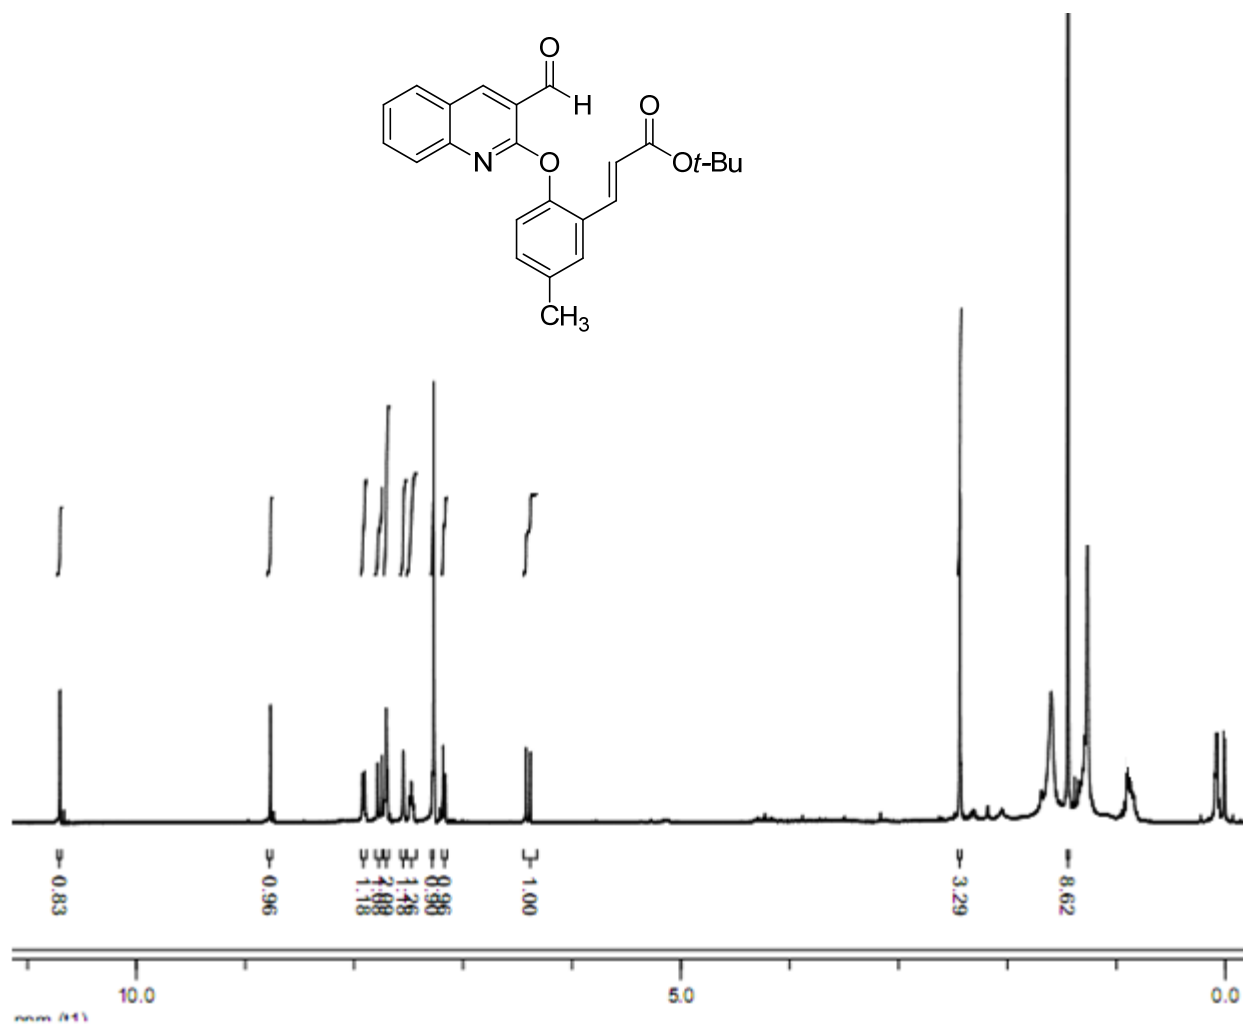

Fig. 33:  $^1\text{H}$  NMR spectra of compound **5q** (CDCl<sub>3</sub>, 400 MHz)

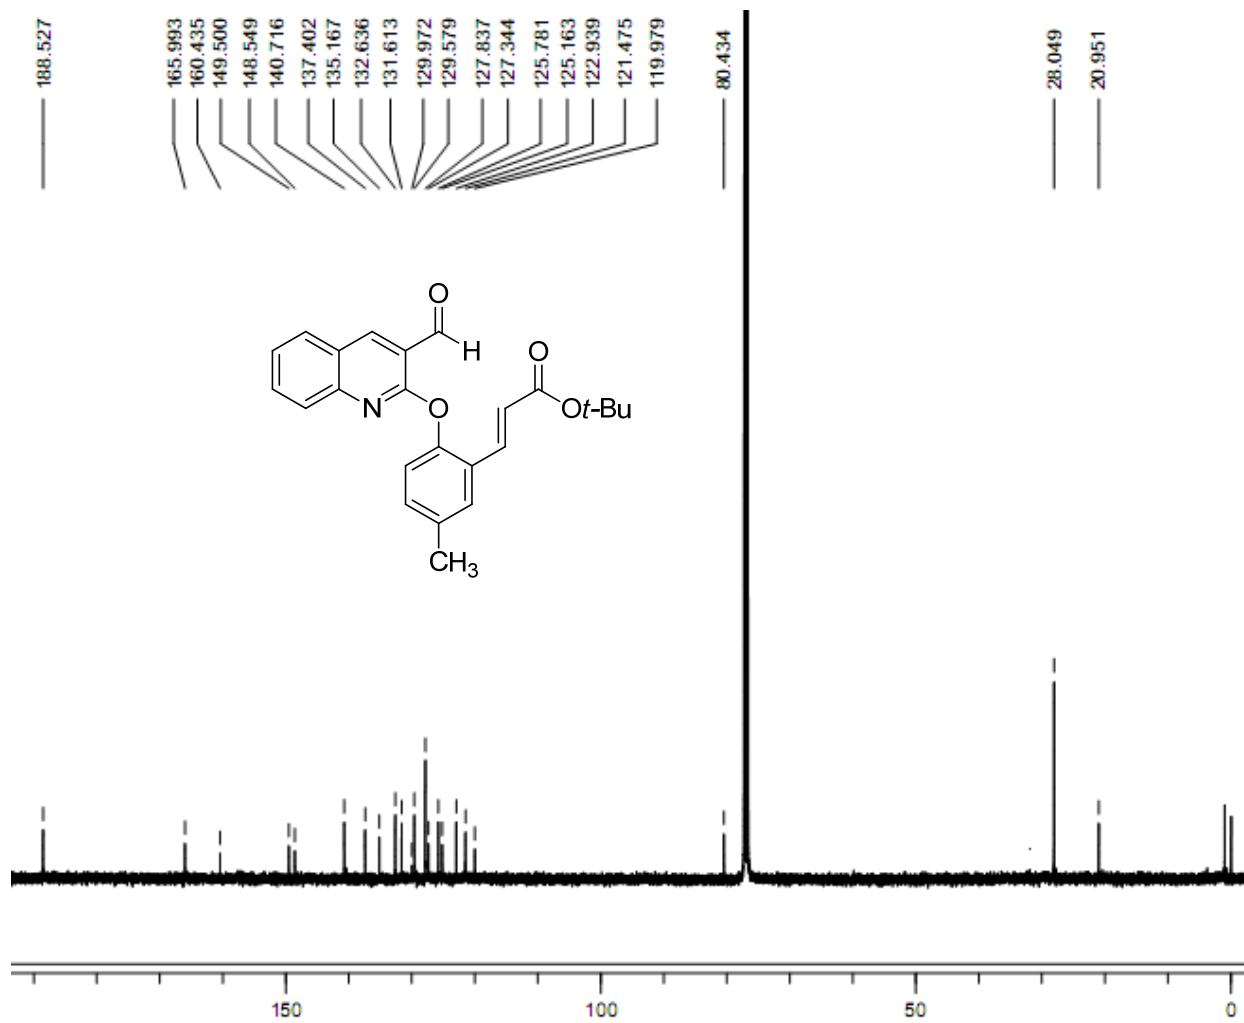

Fig. 34:  $^{13}\text{C}$  NMR spectra of compound **5q** ( $\text{CDCl}_3$ , 100 MHz)

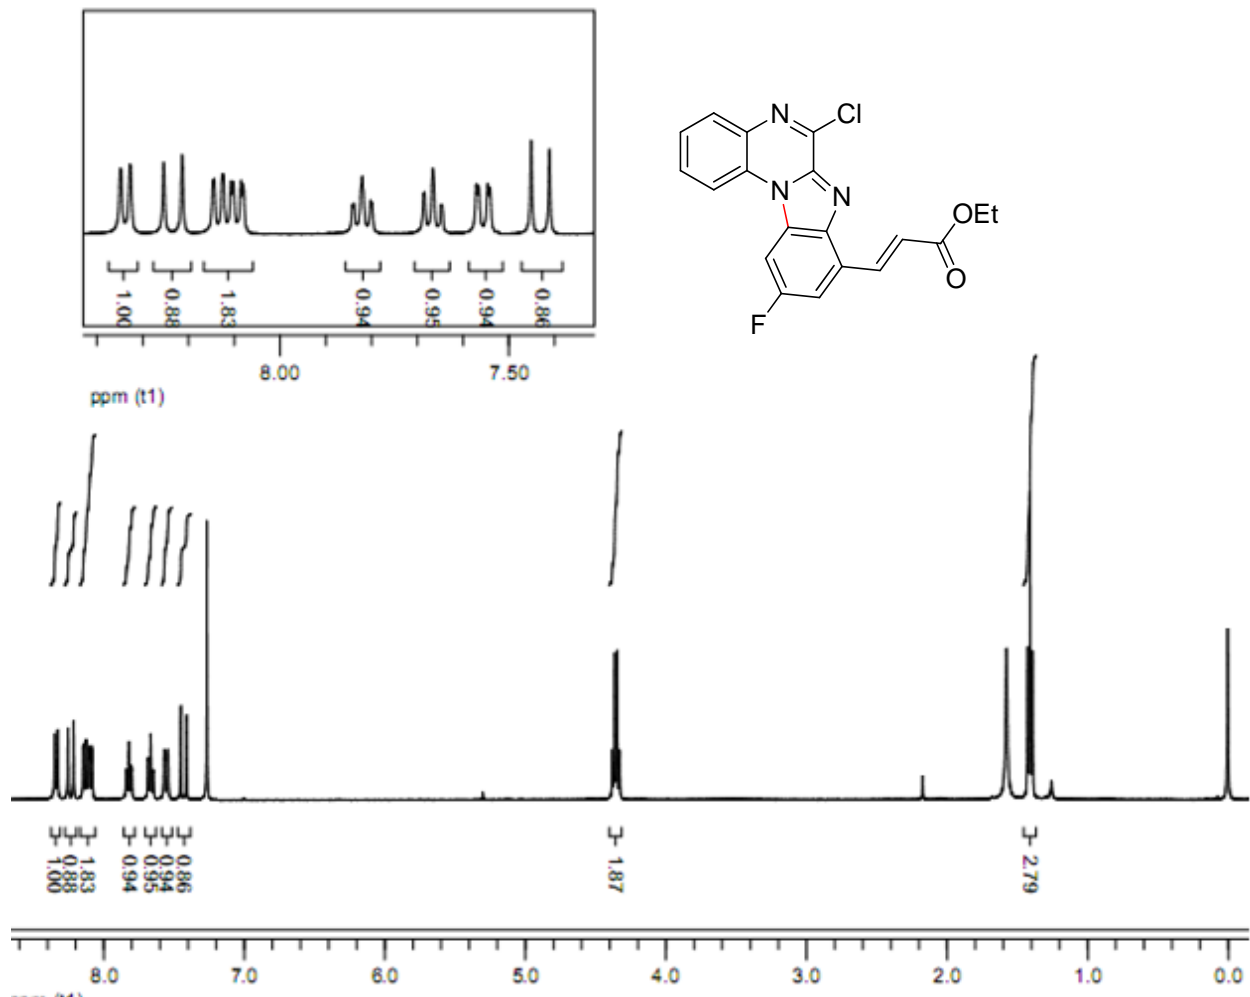

Fig. 35: <sup>1</sup>H NMR spectra of compound **6a** (CDCl<sub>3</sub>, 400 MHz)

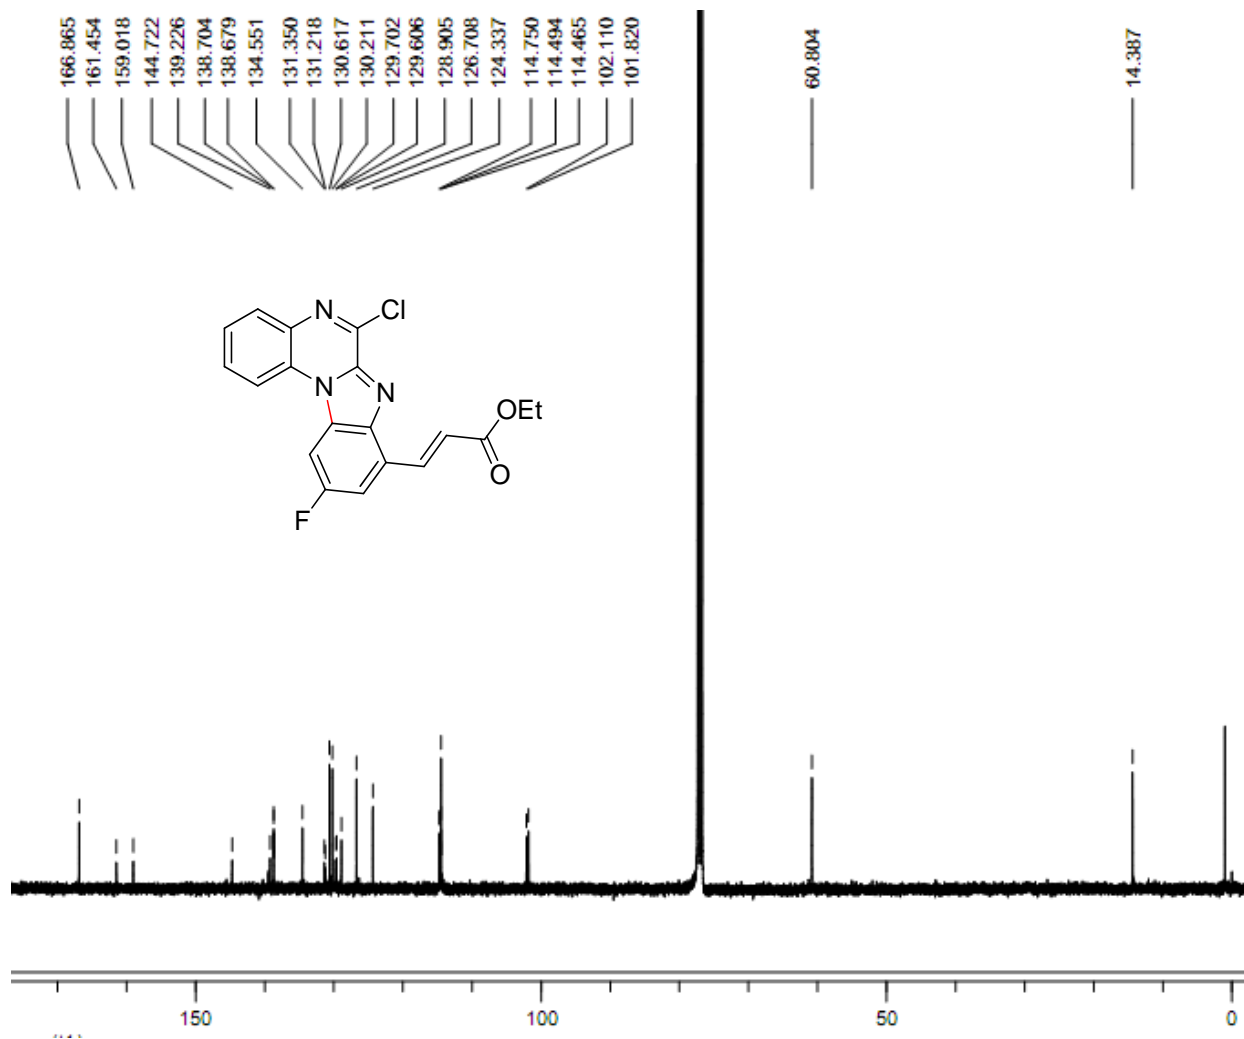

Fig. 36: <sup>13</sup>C NMR spectra of compound **6a** (CDCl<sub>3</sub>, 100 MHz)

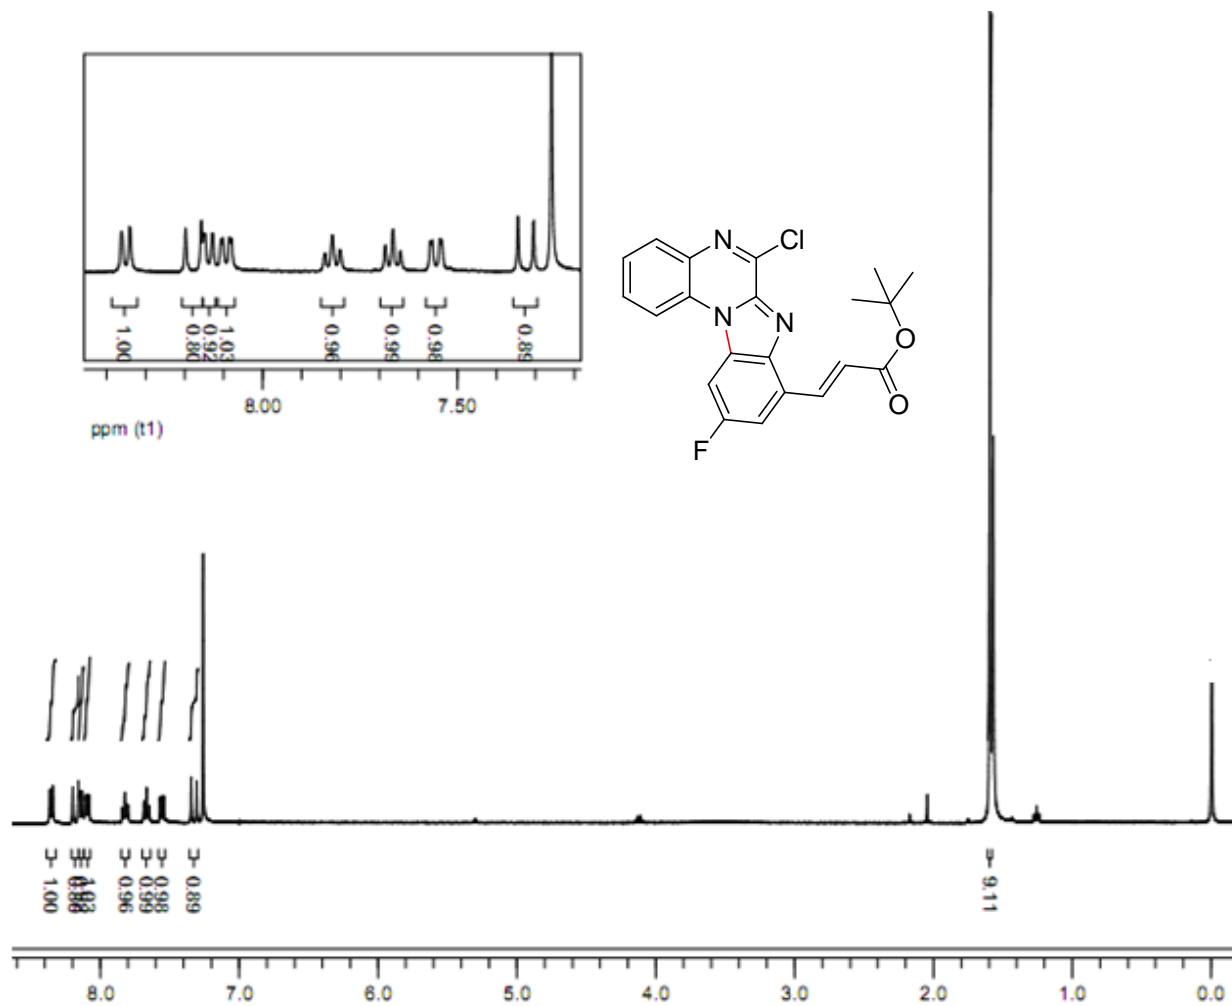

Fig. 37:  $^1\text{H}$  NMR spectra of compound **6b** ( $\text{CDCl}_3$ , 400 MHz)

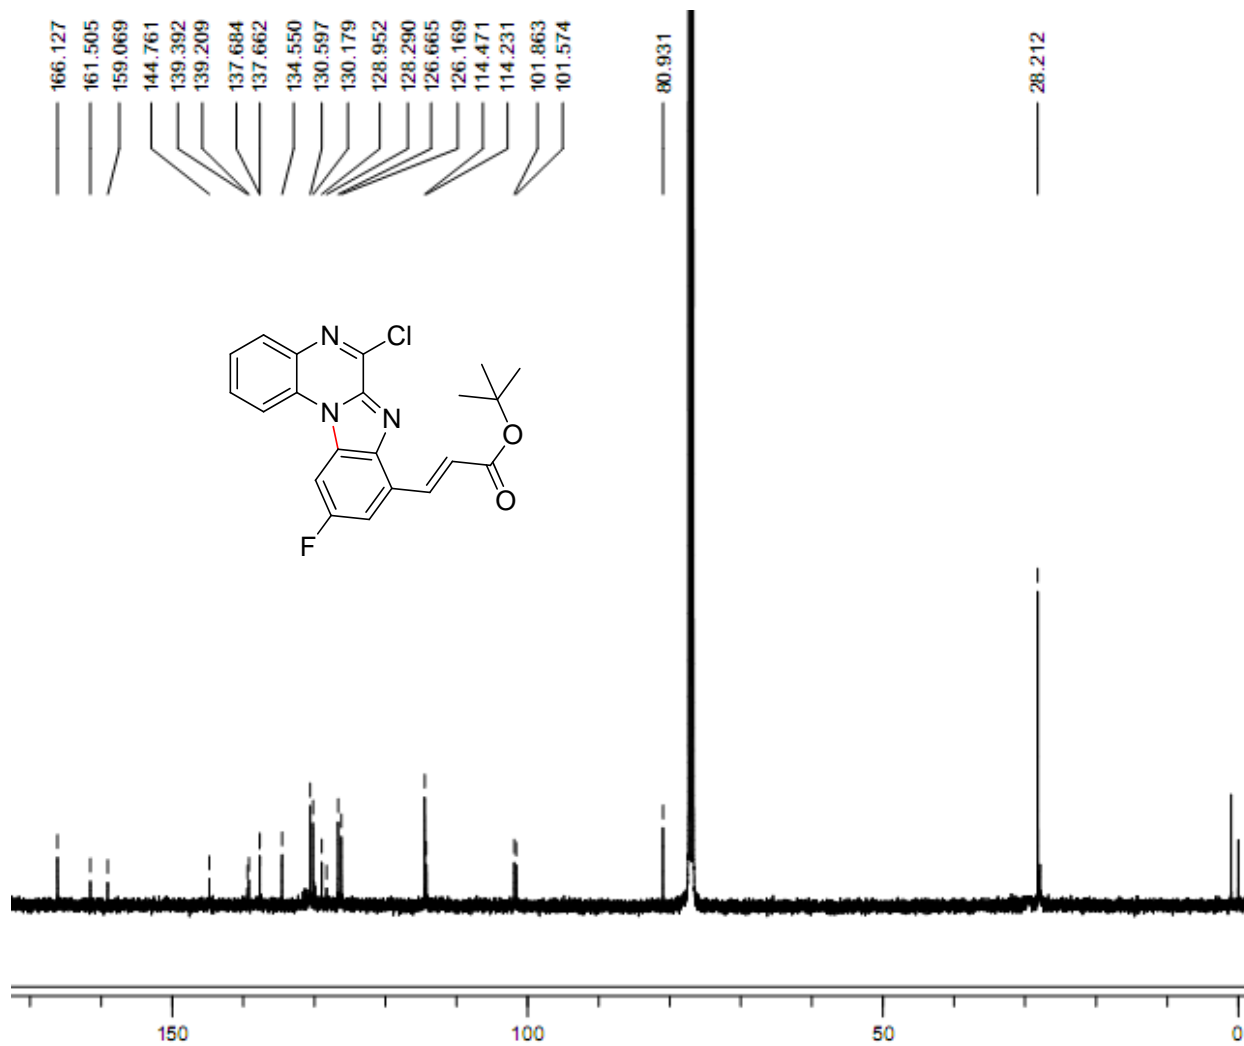

Fig. 38:  $^{13}\text{C}$  NMR spectra of compound **6b** ( $\text{CDCl}_3$ , 100 MHz)

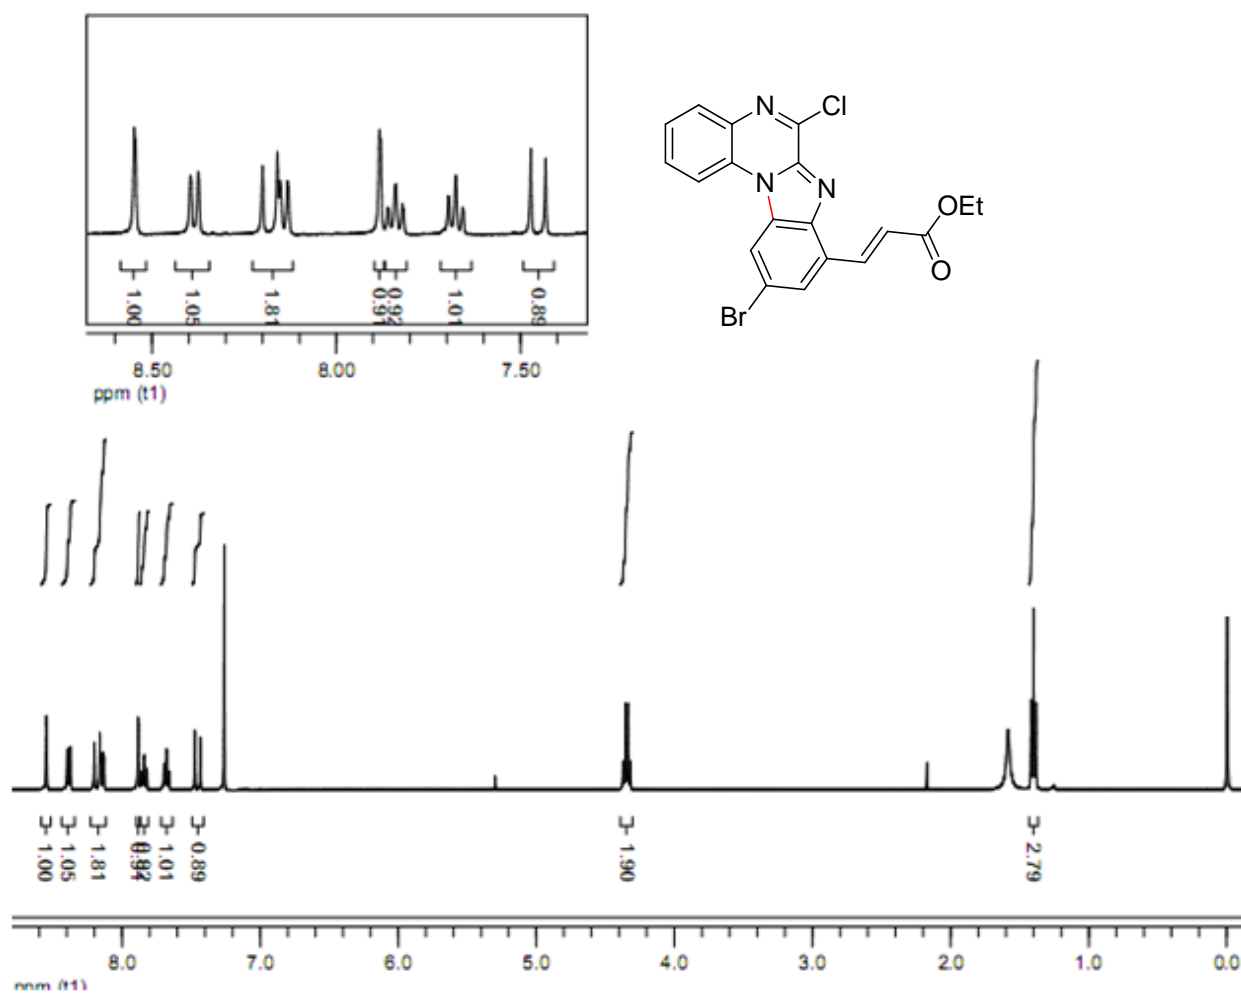

Fig. 39: <sup>1</sup>H NMR spectra of compound **6c** (CDCl<sub>3</sub>, 400 MHz)

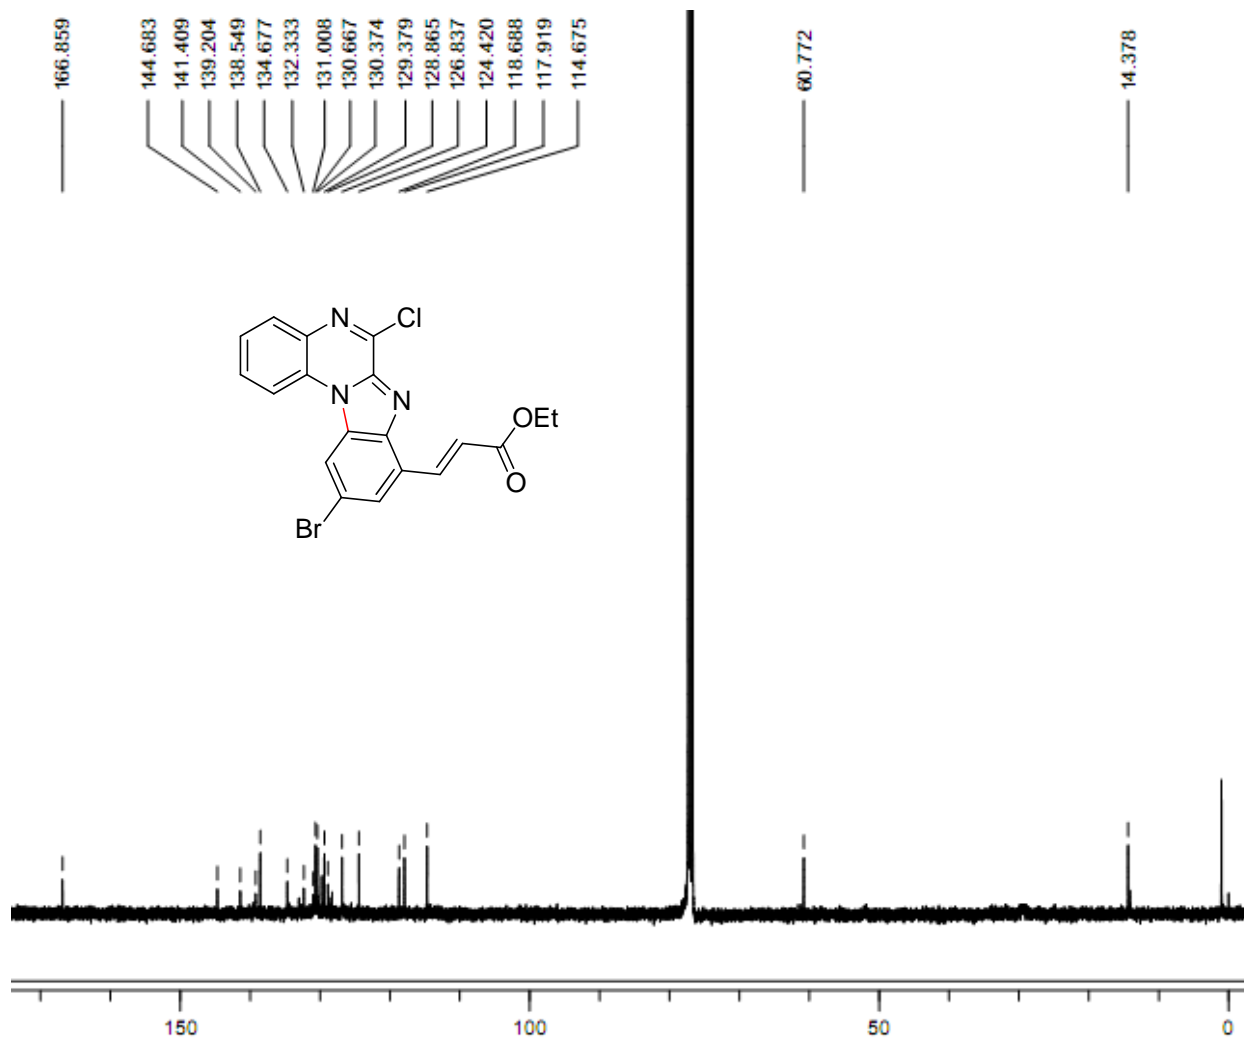

Fig. 40:  $^{13}\text{C}$  NMR spectra of compound **6c** ( $\text{CDCl}_3$ , 100 MHz)



ILS-RAJ-FIDA-4P in CDCl3  
NOE 1D  
A.R.No : NM15G107  
Selective band center: 8.55 (ppm); width: 68.7 (Hz)  
Sample Name:  
Data Collected on:  
DRILS-vmars400  
Archive directory:  
Sample directory:  
Fidfile: NOESY1D  
Pulse Sequence: NOESY1D  
Solvent: cdcl3  
Data collected on: Jul 22 2015

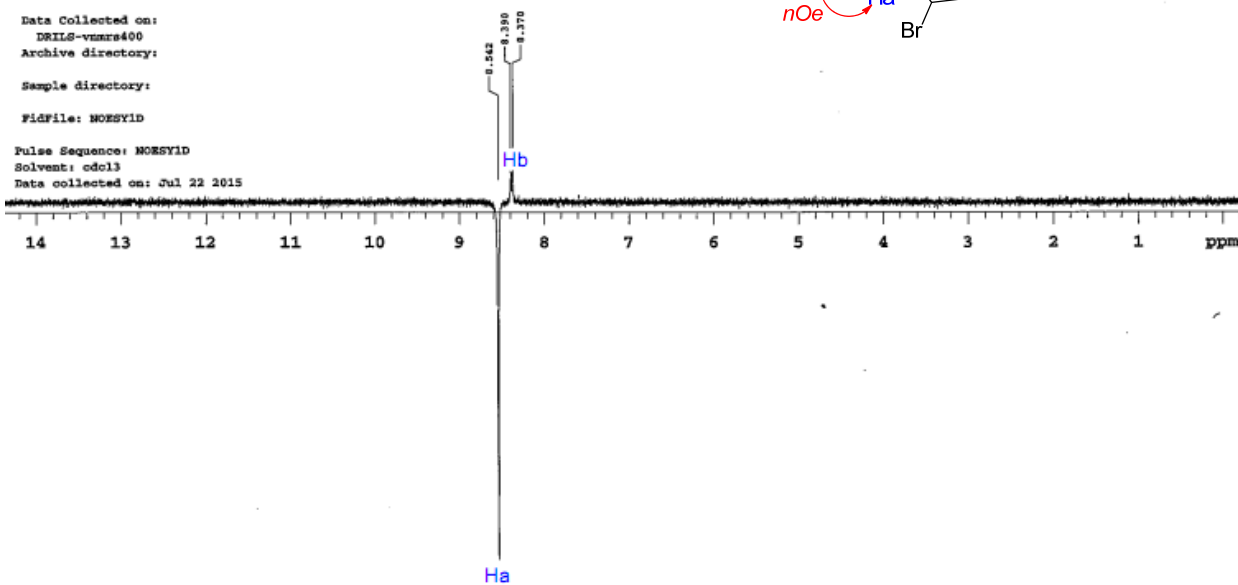

Fig. 41: 1D-NOE spectra of compound **6c**

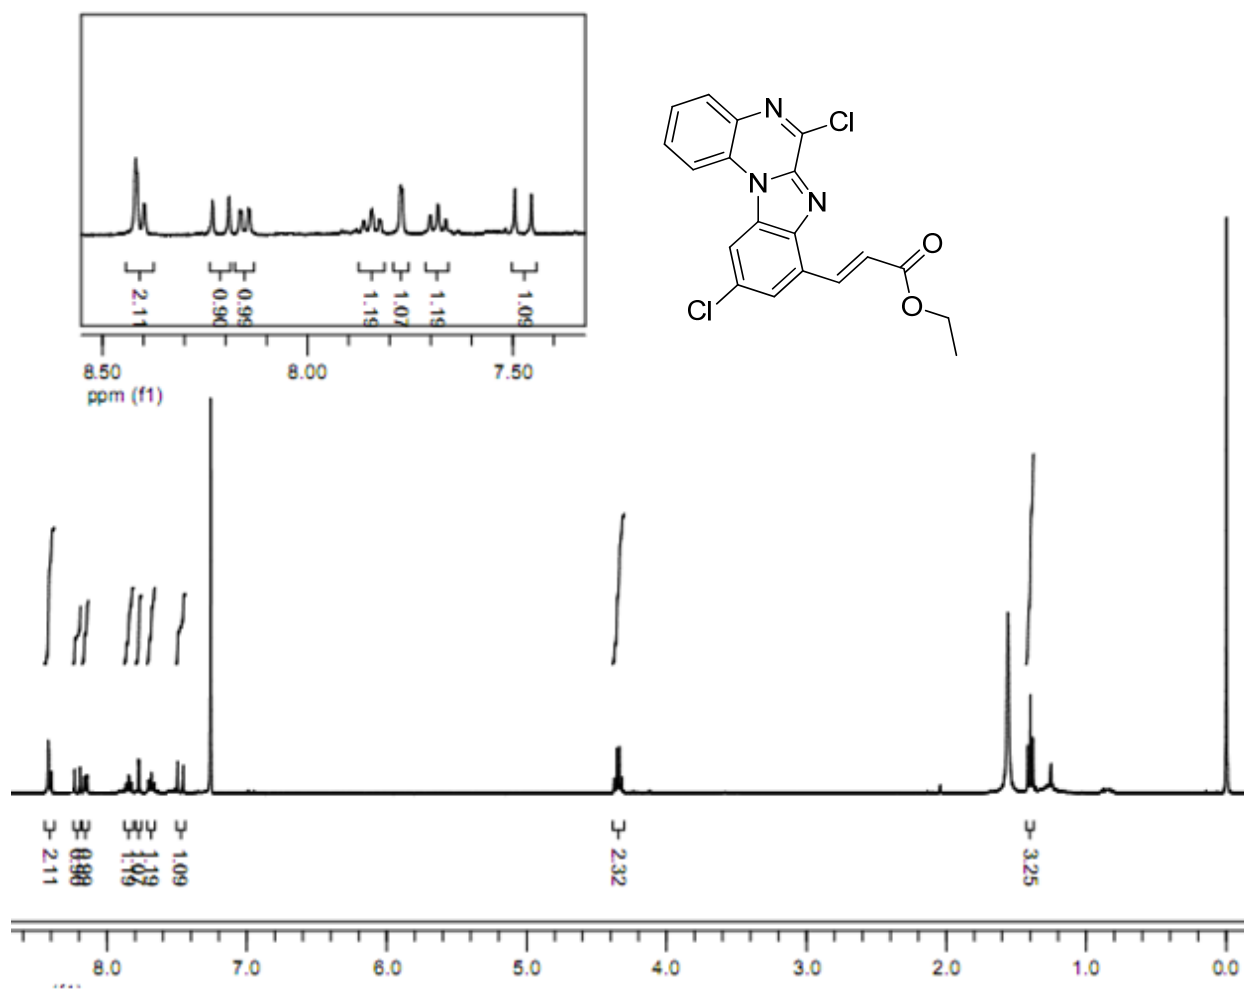

Fig. 42:  $^1\text{H}$  NMR spectra of compound **6d** ( $\text{CDCl}_3$ , 400 MHz)

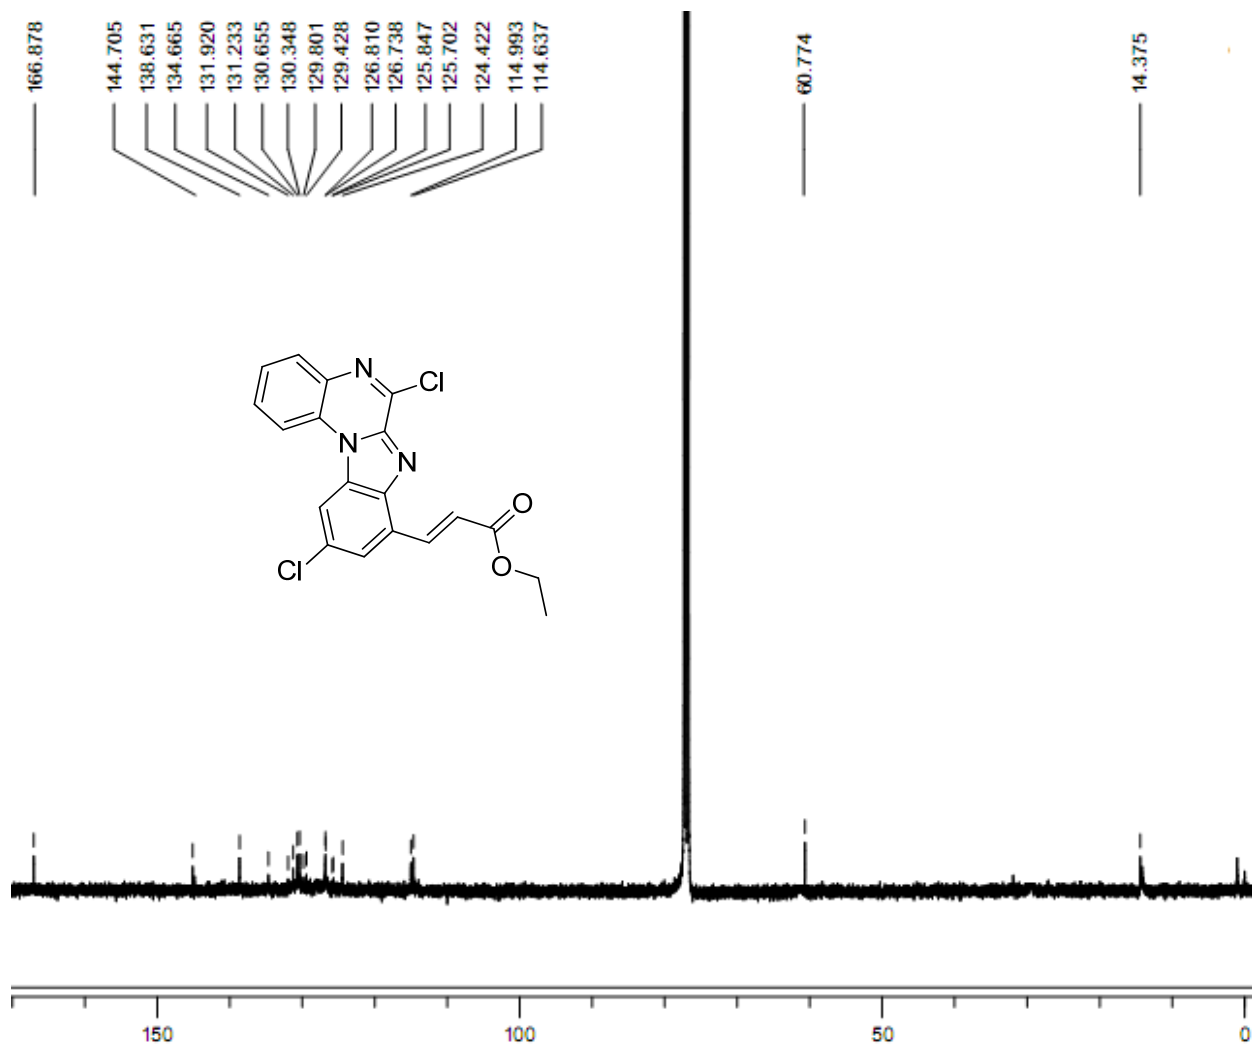

Fig. 43:  $^{13}\text{C}$  NMR spectra of compound **6d** ( $\text{CDCl}_3$ , 100 MHz)

**SAMPLE INFORMATION**

|                                           |                   |                     |             |
|-------------------------------------------|-------------------|---------------------|-------------|
| Sample Name:                              | ILS-RAJ-P-OCH3-ET | Acquired By:        | System      |
| A R Number:                               | CM14K010          | Sample Set Name:    | 251114_3    |
| Vial:                                     | 35                | Acq. Method Set:    | MC          |
| Injection #:                              | 1                 | Processing Method:  | MC PROO     |
| Injection Volume:                         | 5.00 ul           | Channel Name:       | 260.0nm     |
| Run Time:                                 | 12.0 Minutes      | Proc. Chnl. Descr.: | PDA260.0 nm |
| Date Acquired: 11/26/2014 3:12:54 AM IST  |                   |                     |             |
| Date Processed: 11/26/2014 3:28:29 PM IST |                   |                     |             |

Column: Symmetry C-18 75\*4.6mm 3.5µm  
 Mobile phase: A) 0.1% TFA in water B) ACN  
 T/%B: 0/20, 0.5/20, 2/95, 8/95, 10/20, 12/20  
 Flow: 1.0 ml /min, Diluent: ACN: WATER (90:10)

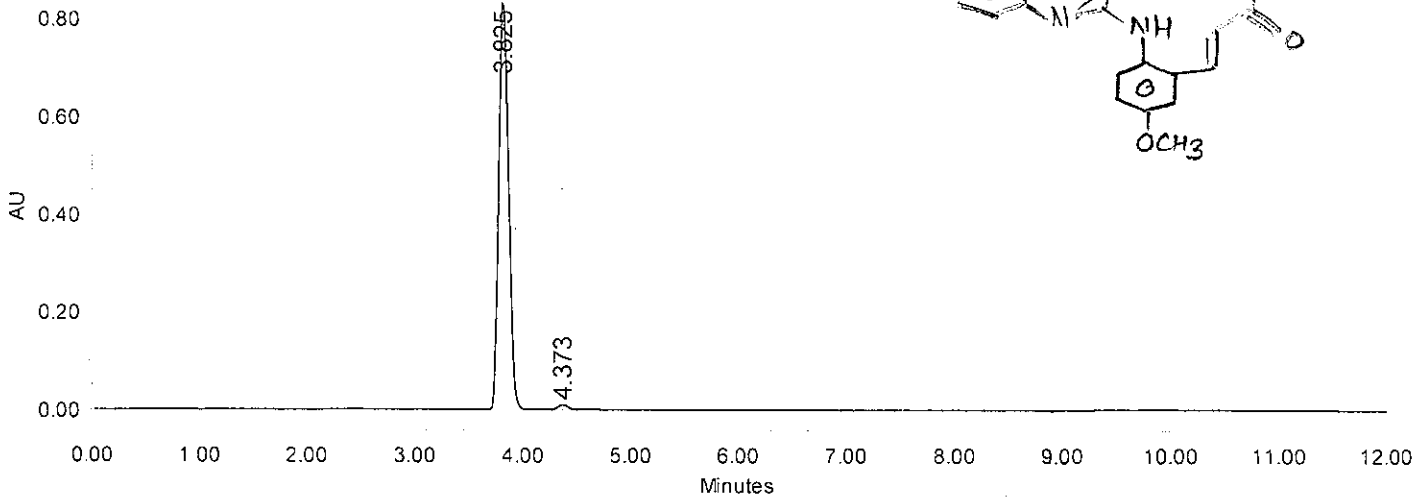

|   | RT    | Area    | % Area | Height |
|---|-------|---------|--------|--------|
| 1 | 3.825 | 5252909 | 98.89  | 831020 |
| 2 | 4.373 | 59013   | 1.11   | 9387   |

Analysed By:

Checked By:

*Signature* 26/11/14

SAMPLE INFORMATION

Sample Name: ILS-RAJ-S2-6F  
 AR Number: CM14L007  
 Vial: 18  
 Injection #: 1  
 Injection Volume: 5.00 ul  
 Run Time: 12.0 Minutes  
 Sample Set Name: 161214  
 Acq. Method Set: MC  
 Processing Method: MC\_PRO  
 Channel Name: 255.0nm  
 Proc. Chnl. Descr.: PDA 255.0 nm  
 Date Acquired: 12/16/2014 2:48:27 PM IST  
 Date Processed: 12/17/2014 11:04:02 AM IST

Column: Symmetry C-18 75\*4.6mm 3.5µm  
 Mobile phase: A) 0.1% TFA in water B) ACN  
 T/%B: 0/20, 3/20, 8/40, 15/95, 20/95, 25/20, 30/20  
 Flow: 1.0 ml/min, Diluent: ACN

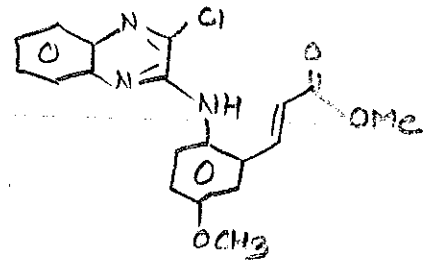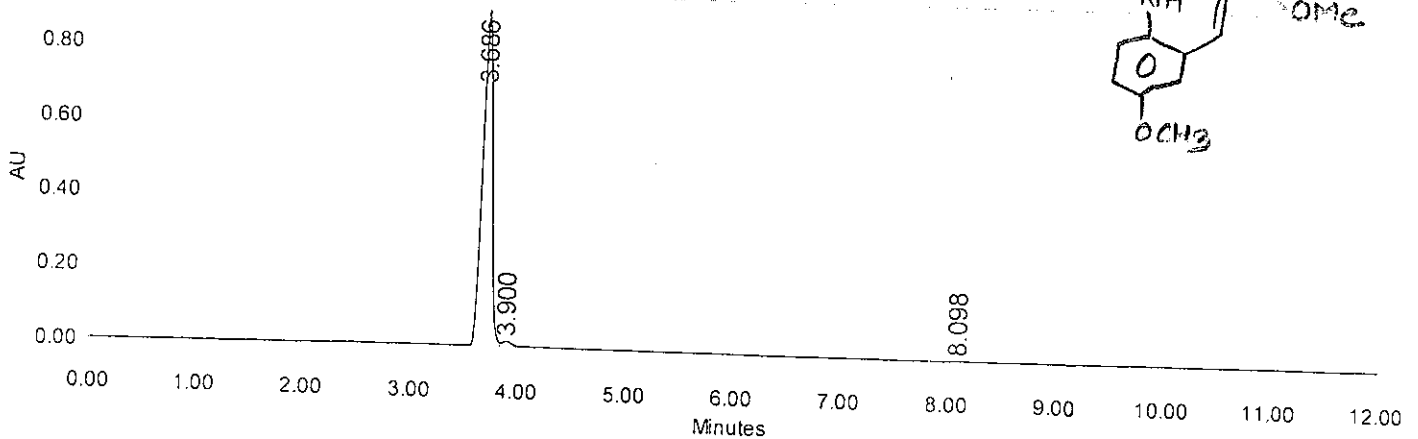

|   | RT    | Area    | % Area | Height |
|---|-------|---------|--------|--------|
| 1 | 3.686 | 5613755 | 98.33  | 890135 |
| 2 | 3.900 | 87188   | 1.53   | 13382  |
| 3 | 8.098 | 7873    | 0.14   | 955    |

*Signature*

Analysed By:

Checked By:

**SAMPLE INFORMATION**

Sample Name: ILS-RAJ-P-OME-T-BU  
 A R Number: CM14K011  
 Vial: 36  
 Injection #: 1  
 Injection Volume: 5.00 ul  
 Run Time: 12.0 Minutes

Acquired By: System  
 Sample Set Name: 251114\_3  
 Acq. Method Set: MC  
 Processing Method: MC PRO0  
 Channel Name: 260.0nm  
 Proc. Chnl. Descr.: PDA 260.0 nm

Date Acquired: 11/26/2014 3:28:38 AM IST  
 Date Processed: 11/26/2014 3:29:27 PM IST

Column: Symmetry C-18 75\*4.6mm 3.5µm  
 Mobile phase: A) 0.1% TFA in water B) ACN  
 T/%B: 0/20, 0.5/20, 2/95, 8/95, 10/20, 12/20  
 Flow: 1.0 ml /min, Diluent: ACN: WATER (90:10)

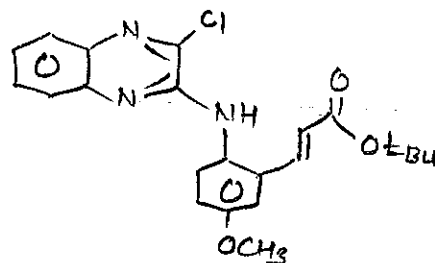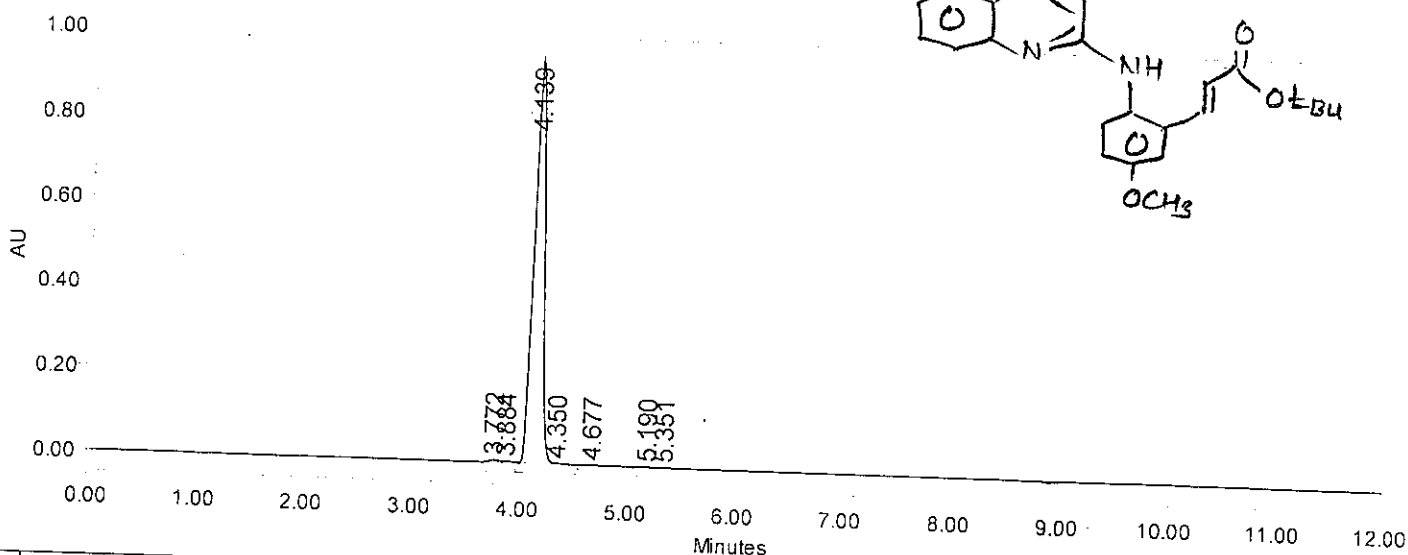

|   | RT    | Area    | % Area | Height |
|---|-------|---------|--------|--------|
| 1 | 3.772 | 34141   | 0.56   | 5165   |
| 2 | 3.884 | 16060   | 0.26   | 2764   |
| 3 | 4.139 | 6059169 | 98.76  | 952772 |
| 4 | 4.350 | 10733   | 0.17   | 2117   |
| 5 | 4.677 | 5209    | 0.08   | 795    |
| 6 | 5.190 | 5030    | 0.08   | 721    |
| 7 | 5.351 | 4872    | 0.08   | 727    |

*Def 26/11/14*

Analysed By:

Checked By:

**SAMPLE INFORMATION**

|                   |                           |                     |              |
|-------------------|---------------------------|---------------------|--------------|
| Sample Name:      | ILS-RAJ-S2-4F             | Acquired By:        | System       |
| A R Number:       | CM14K007                  | Sample Set Name:    | 241114       |
| Vial:             | 16                        | Acq. Method Set:    | MC           |
| Injection #:      | 1                         | Processing Method:  | MC PRO       |
| Injection Volume: | 5.00 ul                   | Channel Name:       | 260.0nm      |
| Run Time:         | 12.0 Minutes              | Proc. Chnl. Descr.: | PDA 260.0 nm |
| Date Acquired:    | 11/24/2014 2:30:07 PM IST |                     |              |
| Date Processed:   | 11/24/2014 2:59:29 PM IST |                     |              |

Column: Symmetry C-18 75\*4.6mm 3.5µm  
 Mobile phase: A) 0.1% TFA in water B) ACN  
 T/%B: 0/10, 2/10, 10/95, 20/95, 22/10, 25/10  
 Flow: 1.0 ml /min, Diluent: ACN: WATER (80:20)

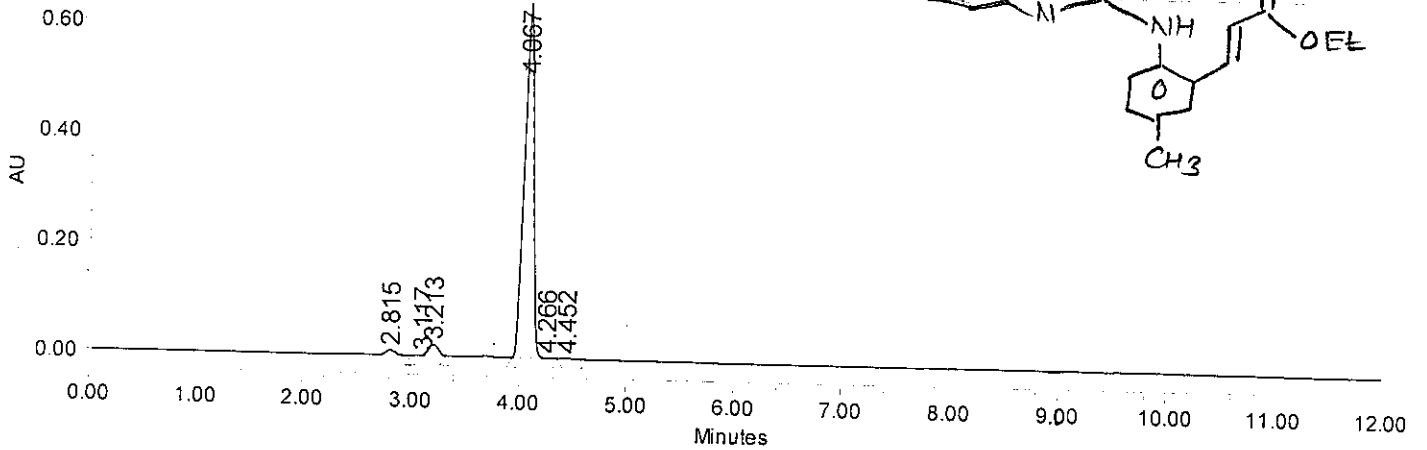

|   | RT    | Area    | % Area | Height |
|---|-------|---------|--------|--------|
| 1 | 2.815 | 57583   | 1.42   | 9425   |
| 2 | 3.117 | 3980    | 0.10   | 1026   |
| 3 | 3.213 | 122312  | 3.01   | 20479  |
| 4 | 4.067 | 3855740 | 95.00  | 635411 |
| 5 | 4.266 | 8102    | 0.20   | 1550   |
| 6 | 4.452 | 10850   | 0.27   | 1955   |

Analysed By:

Checked By:

CPRI @ DRILS  
HPLC ANALYSIS REPORT

Inj Date : Tue, 10. Feb. 2015 Acq Operator: SHASHIDHAR  
Sample Name : ILS-RAJ-me ~~me~~ Vial 14  
A R Number : CM15B015 ->Inj. Vol. : 5µL  
Acq. Method : D:\CHEM32\_002\1\METHODS\MC.M  
Analysis Method : D:\CHEM32\_002\1\METHODS\MC.M  
Method Info : Column: Symmetry C-18 75\*4.6mm 3.5µm  
Mobile phase: A) 0.1% TFA in water ,B) ACN  
T/%B:0/20,0.5/20,2/95,10/95,10.5/20,12/20  
Flow:1.0mL/min Diluent: ACN:Water(80:20)

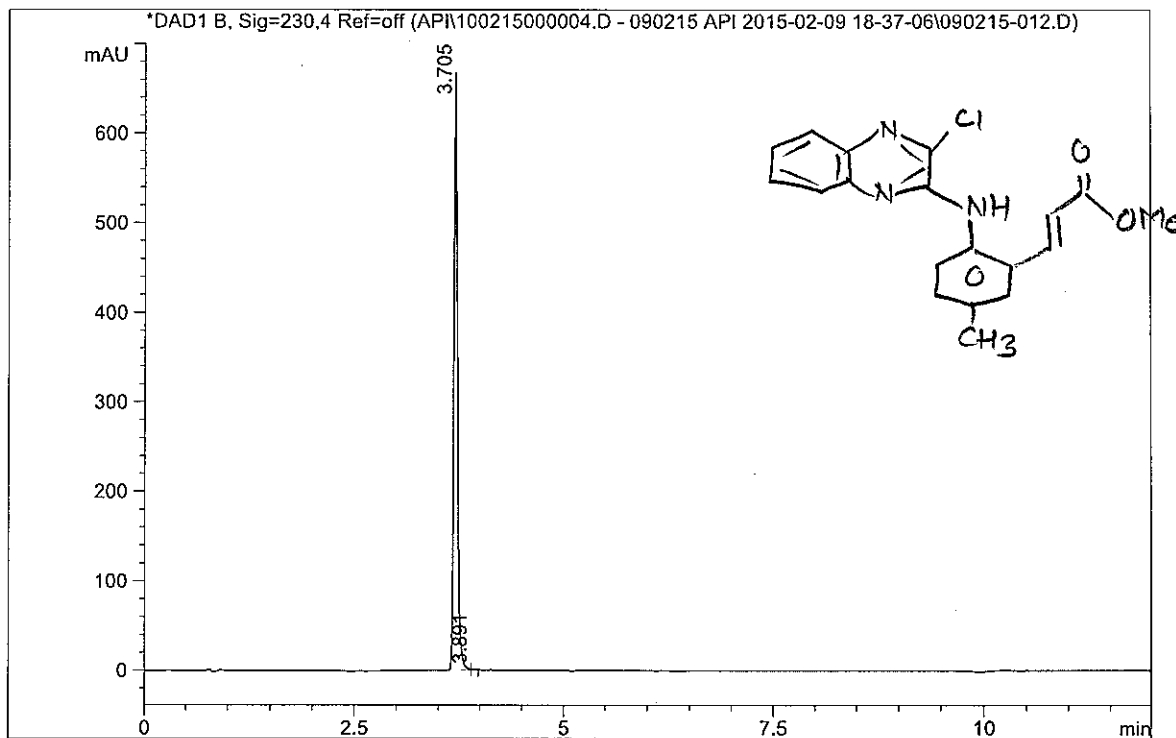

Signal 1: DAD1 B, Sig=230,4 Ref=off

| Peak # | RT [min] | Area     | Area % |
|--------|----------|----------|--------|
| 1      | 3.705    | 2106.615 | 99.907 |
| 2      | 3.891    | 1.960    | 0.093  |

Analysed by :

Checked by :



SAMPLE INFORMATION

Sample Name: ILS-RAJ-P-Me-tBu  
 AR Number: CM15D022  
 Vial: 11  
 Injection #: 1  
 Injection Volume: 6.00 ul  
 Run Time: 12.0 Minutes  
 Sample Set Name: 300415  
 Acq. Method Set: MC  
 Processing Method: MC\_PRO  
 Channel Name: 265.0nm  
 Proc. Chnl. Descr.: PDA 265.0 nm  
 Date Acquired: 4/30/2015 3:12:56 PM IST  
 Date Processed: 4/30/2015 4:51:20 PM IST

Column: Symmetry C-18 75\*4.6mm 3.5µm  
 Mobile phase. A) 0.1% TFA in water B) ACN  
 T/%B: 0/20, 0.5/20, 2/95, 8/95, 10/20, 12/20  
 Flow: 1.0 ml /min, Diluent: ACN: WATER (90:10)

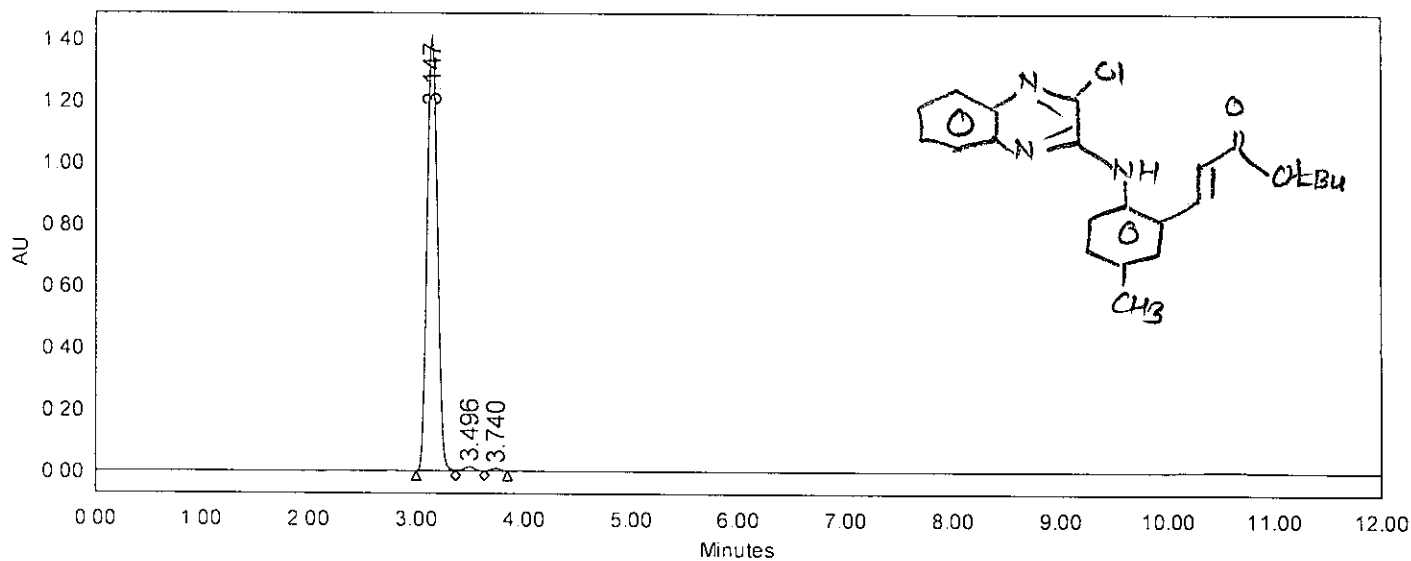

| RT      | Area    | % Area | Height  |
|---------|---------|--------|---------|
| 1 3.147 | 9296297 | 98.39  | 1409602 |
| 2 3.496 | 98842   | 1.05   | 13267   |
| 3 3.740 | 52976   | 0.56   | 8274    |

Analyzed By:

Checked By:

*Ref 30104/15*

**SAMPLE INFORMATION**

|                   |                              |                     |              |
|-------------------|------------------------------|---------------------|--------------|
| Sample Name:      | ILS-RAJ-P- <del>DR</del> -ET | Acquired By:        | System       |
| A R Number:       | CM14K003                     | Sample Set Name:    | 241114       |
| Vial:             | 12                           | Acq. Method Set:    | MC           |
| Injection #:      | 1                            | Processing Method:  | MC PRO       |
| Injection Volume: | 5.00 ul                      | Channel Name:       | 260.0nm      |
| Run Time:         | 12.0 Minutes                 | Proc. Chnl. Descr.: | PDA 260.0 nm |
| Date Acquired:    | 11/24/2014 1:26:38 PM IST    |                     |              |
| Date Processed:   | 11/24/2014 2:41:53 PM IST    |                     |              |

Column: Symmetry C-18 75\*4.6mm 3.5µm  
 Mobile phase: A) 0.1% TFA in water B) ACN  
 T1%B: 0/10, 2/10, 10/95, 20/95, 22/10, 25/10  
 Flow: 1.0 ml /min, Diluent: ACN: WATER (80:20)

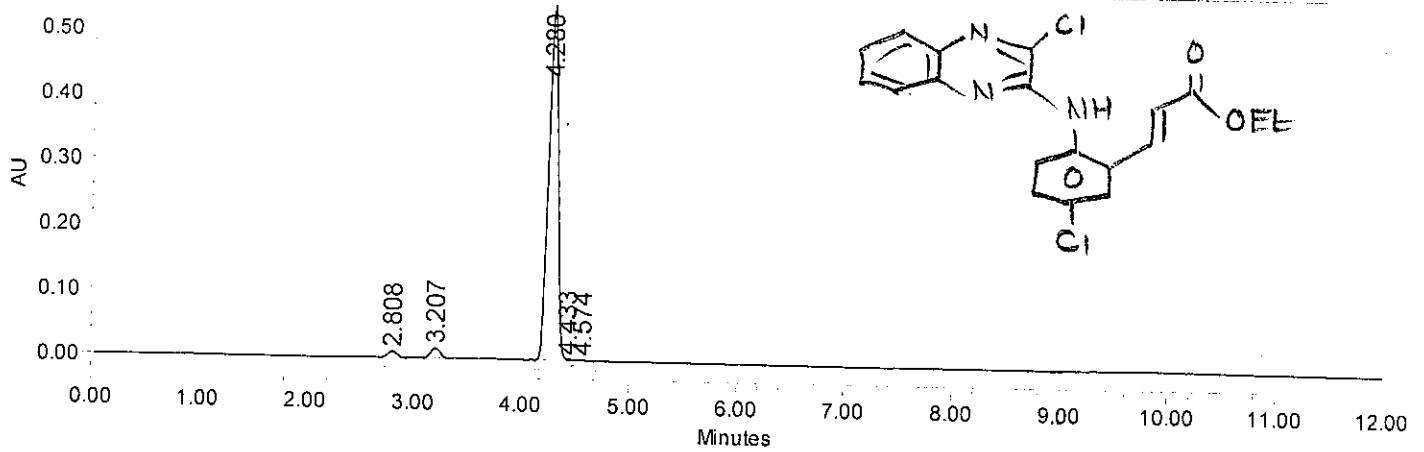

|   | RT    | Area    | % Area | Height |
|---|-------|---------|--------|--------|
| 1 | 2.808 | 55335   | 1.60   | 9314   |
| 2 | 3.207 | 86969   | 2.52   | 14837  |
| 3 | 4.280 | 3301406 | 95.49  | 540398 |
| 4 | 4.433 | 8369    | 0.24   | 2010   |
| 5 | 4.574 | 5407    | 0.16   | 903    |

*Def 24/11/14*

Analysed By:

Checked By:

**SAMPLE INFORMATION**

|                   |                           |                     |              |
|-------------------|---------------------------|---------------------|--------------|
| Sample Name:      | ILS-RAJ-P-CL-ME           | Acquired By:        | System       |
| A R Number:       | CM14K014                  | Sample Set Name:    | 251114_3     |
| Vial:             | 39                        | Acq. Method Set:    | MC           |
| Injection #:      | 1                         | Processing Method:  | MC PRO0      |
| Injection Volume: | 5.00 ul                   | Channel Name:       | 260.0nm      |
| Run Time:         | 12.0 Minutes              | Proc. Chnl. Descr.: | PDA 260.0 nm |
| Date Acquired:    | 11/26/2014 4:16:23 AM IST |                     |              |
| Date Processed:   | 11/26/2014 3:31:00 PM IST |                     |              |

Column: Symmetry C-18 75\*4.6mm 3.5µm  
 Mobile phase: A) 0.1% TFA in water B) ACN  
 T/%B: 0/20, 0.5/20, 2/95, 8/95, 10/20, 12/20  
 Flow: 1.0 ml/min, Diluent: ACN: WATER (90:10)

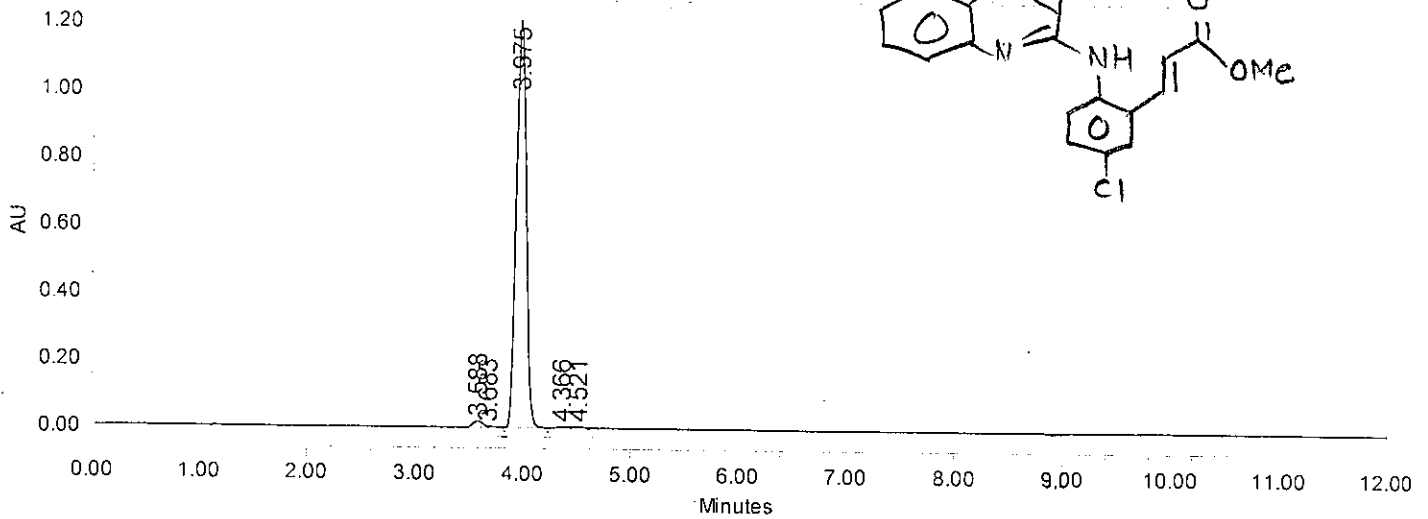

|   | RT    | Area    | % Area | Height  |
|---|-------|---------|--------|---------|
| 1 | 3.588 | 116605  | 1.48   | 18864   |
| 2 | 3.683 | 8221    | 0.10   | 2183    |
| 3 | 3.975 | 7723046 | 97.87  | 1211200 |
| 4 | 4.366 | 21113   | 0.27   | 3410    |
| 5 | 4.521 | 21985   | 0.28   | 3781    |

*Analysed By: 26/11/14*

Analysed By:

Checked By:

**SAMPLE INFORMATION**

|                                           |                   |                     |              |
|-------------------------------------------|-------------------|---------------------|--------------|
| Sample Name:                              | ILS-RAJ-P-CL-T-BU | Acquired By:        | System       |
| A R Number:                               | CM14K013          | Sample Set Name:    | 251114_3     |
| Vial:                                     | 38                | Acq. Method Set:    | MC           |
| Injection #:                              | 1                 | Processing Method:  | MC PROO      |
| Injection Volume:                         | 5.00 ul           | Channel Name:       | 260.0nm      |
| Run Time:                                 | 12.0 Minutes      | Proc. Chnl. Descr.: | PDA 260.0 nm |
| Date Acquired: 11/26/2014 4:00:06 AM IST  |                   |                     |              |
| Date Processed: 11/26/2014 3:30:28 PM IST |                   |                     |              |

Column: Symmetry C-18 75\*4.6mm 3.5µm  
 Mobile phase: A) 0.1% TFA in water B) ACN  
 T/%B: 0/20, 0.5/20, 2/95, 8/95, 10/20, 12/20  
 Flow: 1.0 ml/min, Diluent: ACN: WATER (90:10)

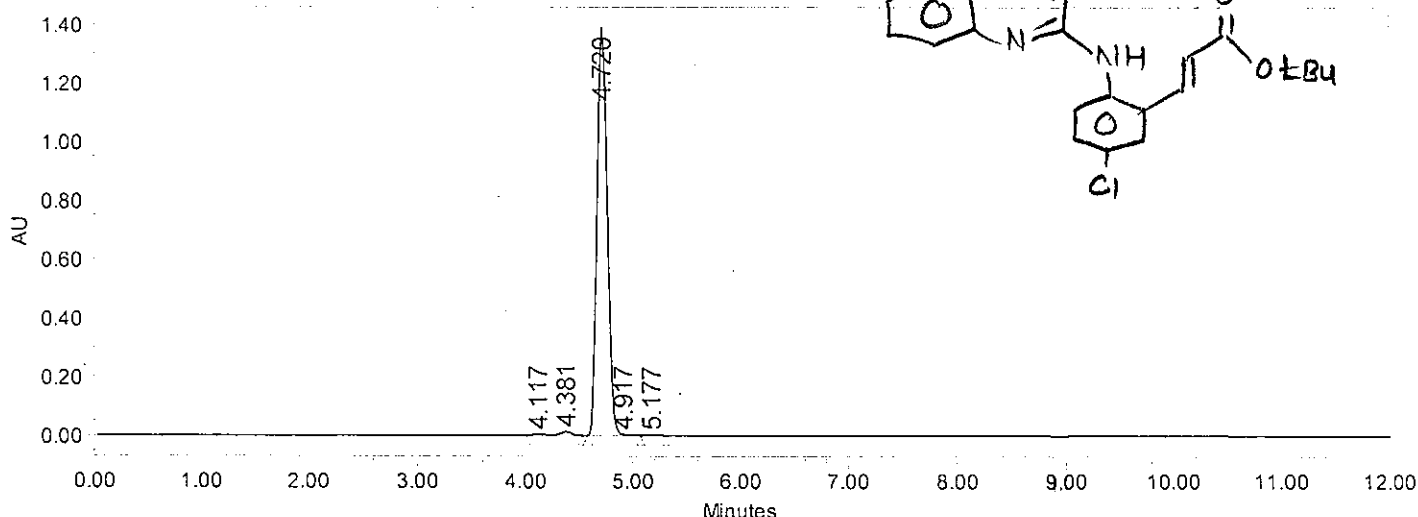

|   | RT    | Area    | % Area | Height  |
|---|-------|---------|--------|---------|
| 1 | 4.117 | 37445   | 0.40   | 4797    |
| 2 | 4.381 | 93618   | 1.01   | 12722   |
| 3 | 4.720 | 9098385 | 98.32  | 1380371 |
| 4 | 4.917 | 14238   | 0.15   | 3237    |
| 5 | 5.177 | 10376   | 0.11   | 1650    |

*Def 26/11/14*

Analysed By:

Checked By:

SAMPLE INFORMATION

Sample Name: ILS-RAJ-~~1~~  
 A R Number: CM15C037  
 Vial: 32  
 Injection #: 1  
 Injection Volume: 10.00 ul  
 Run Time: 12.0 Minutes  
 Date Acquired: 3/31/2015 3:01:22 PM IST  
 Date Processed: 3/31/2015 5:48:09 PM IST

Sample Set Name: 310315  
 Acq. Method Set: MC  
 Processing Method: MC\_PRO  
 Channel Name: 220.0nm  
 Proc. Chnl. Descr.: PDA 220.0 nm Blank Subtracted

Column: Symmetry C-18 75\*4.6mm 3.5µm  
 Mobile phase: A) 0.1% TFA in water B) ACN  
 T/%B: 0/20, 0.5/20, 2/95, 8/95, 10/20, 12/20  
 Flow: 1.0 ml /min, Diluent: ACN: WATER (90:10)

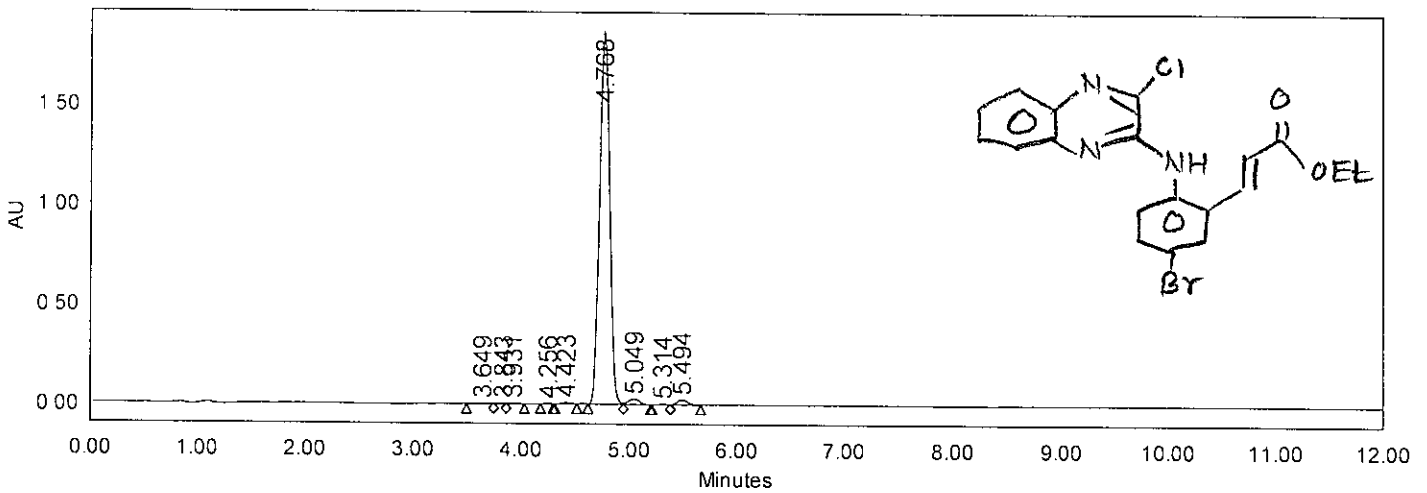

|   | RT    | Area     | % Area | Height  |
|---|-------|----------|--------|---------|
| 1 | 3.649 | 28885    | 0.22   | 2827    |
| 2 | 3.843 | 23926    | 0.18   | 4050    |
| 3 | 3.931 | 32873    | 0.25   | 5040    |
| 4 | 4.256 | 7654     | 0.06   | 1884    |
| 5 | 4.423 | 40632    | 0.31   | 7404    |
| 6 | 4.768 | 12420818 | 95.95  | 1866613 |
| 7 | 5.049 | 202757   | 1.57   | 27321   |
| 8 | 5.314 | 18077    | 0.14   | 3123    |
| 9 | 5.494 | 168859   | 1.30   | 24565   |

Analyzed By:

*Alig 3/31/2015*

Checked By:

**SAMPLE INFORMATION**

|                   |                           |                     |              |
|-------------------|---------------------------|---------------------|--------------|
| Sample Name:      | ILS-RAJ-P-BR-ME           | Acquired By:        | System       |
| A R Number:       | CM14K004                  | Sample Set Name:    | 241114       |
| Vial:             | 13                        | Acq. Method Set:    | MC           |
| Injection #:      | 1                         | Processing Method:  | MC PRO       |
| Injection Volume: | 5.00 ul                   | Channel Name:       | 260.0nm      |
| Run Time:         | 12.0 Minutes              | Proc. Chnl. Descr.: | PDA 260.0 nm |
| Date Acquired:    | 11/24/2014 1:42:22 PM IST |                     |              |
| Date Processed:   | 11/24/2014 2:43:32 PM IST |                     |              |

Column: Symmetry C-18 75\*4.6mm 3.5µm  
 Mobile phase: A) 0.1% TFA in water B) ACN  
 T/%B: 0/10, 2/10, 10/95, 20/95, 22/10, 25/10  
 Flow: 1.0 ml /min, Diluent: ACN: WATER (80:20)

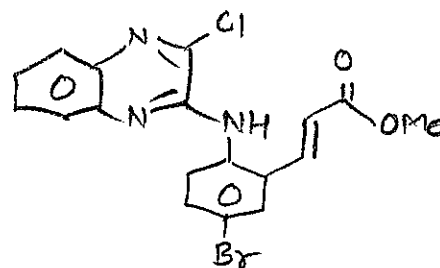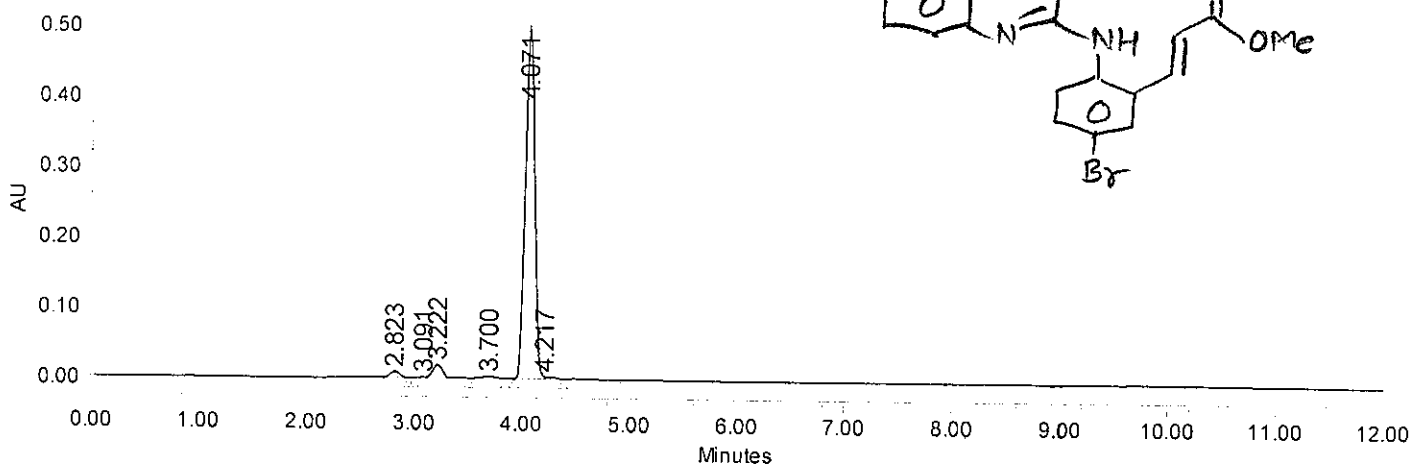

|   | RT    | Area    | % Area | Height |
|---|-------|---------|--------|--------|
| 1 | 2.823 | 52643   | 1.63   | 8905   |
| 2 | 3.091 | 3343    | 0.10   | 763    |
| 3 | 3.222 | 110998  | 3.45   | 18609  |
| 4 | 3.700 | 20961   | 0.65   | 2283   |
| 5 | 4.071 | 3014646 | 93.63  | 497425 |
| 6 | 4.217 | 17220   | 0.53   | 3115   |

Analysed By:

Checked By:

**SAMPLE INFORMATION**

|                   |                           |                     |              |
|-------------------|---------------------------|---------------------|--------------|
| Sample Name:      | ILS-RAJ-P-F-ME            | Acquired By:        | System       |
| A R Number:       | CM14K009                  | Sample Set Name:    | 251114_3     |
| Vial:             | 34                        | Acq. Method Set:    | MC           |
| Injection #:      | 1                         | Processing Method:  | MC PRO0      |
| Injection Volume: | 5.00 ul                   | Channel Name:       | 260.0nm      |
| Run Time:         | 12.0 Minutes              | Proc. Chnl. Descr.: | PDA 260.0 nm |
| Date Acquired:    | 11/26/2014 2:57:11 AM IST |                     |              |
| Date Processed:   | 11/26/2014 3:27:00 PM IST |                     |              |

Column: Symmetry C-18 75\*4.6mm 3.5µm  
 Mobile phase: A) 0.1% TFA in water B) ACN  
 T/%B: 0/20, 0.5/20, 2/95, 8/95, 10/20, 12/20  
 Flow: 1.0 ml /min, Diluent: ACN: WATER (90:10)

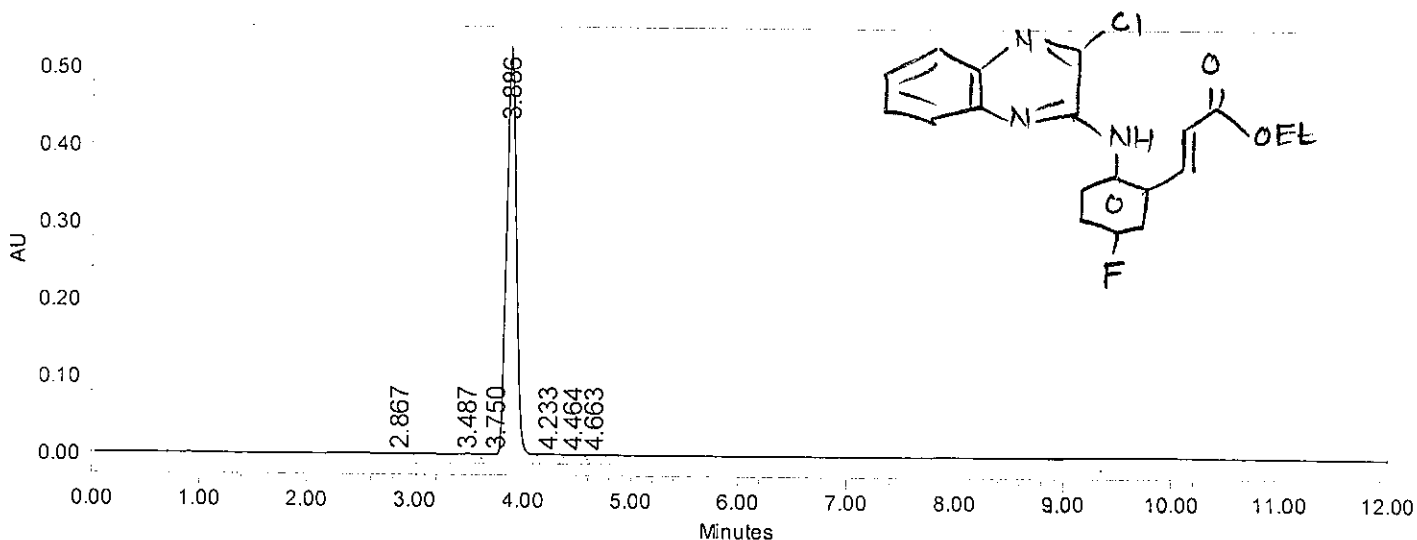

|   | RT    | Area    | % Area | Height |
|---|-------|---------|--------|--------|
| 1 | 2.867 | 1750    | 0.05   | 245    |
| 2 | 3.487 | 4528    | 0.14   | 734    |
| 3 | 3.750 | 1067    | 0.03   | 288    |
| 4 | 3.886 | 3266739 | 99.71  | 520515 |
| 5 | 4.233 | 1031    | 0.03   | 152    |
| 6 | 4.464 | 716     | 0.02   | 127    |
| 7 | 4.663 | 493     | 0.02   | 87     |

*Signature* 26/11/14

Analysed By:

Checked By:

SAMPLE INFORMATION

Sample Name: ILS-RAJ-P-F-TBu  
 AR Number: CM15D024  
 Vial: 13  
 Injection #: 1  
 Injection Volume: 6.00 ul  
 Run Time: 12.0 Minutes  
 Sample Set Name: 300415  
 Acq. Method Set: MC  
 Processing Method: MC\_PRO  
 Channel Name: 220.0nm@1  
 Proc. Chnl. Descr.: PDA 220.0 nm  
 Date Acquired: 4/30/2015 3:42:27 PM IST  
 Date Processed: 4/30/2015 4:52:02 PM IST

Column: Symmetry C-18 75\*4.6mm 3.5µm  
 Mobile phase: A) 0.1% TFA in water B) ACN  
 T/%B: 0/20, 0.5/20, 2/95, 8/95, 10/20, 12/20  
 Flow: 1.0 ml /min, Diluent: ACN: WATER (90:10)

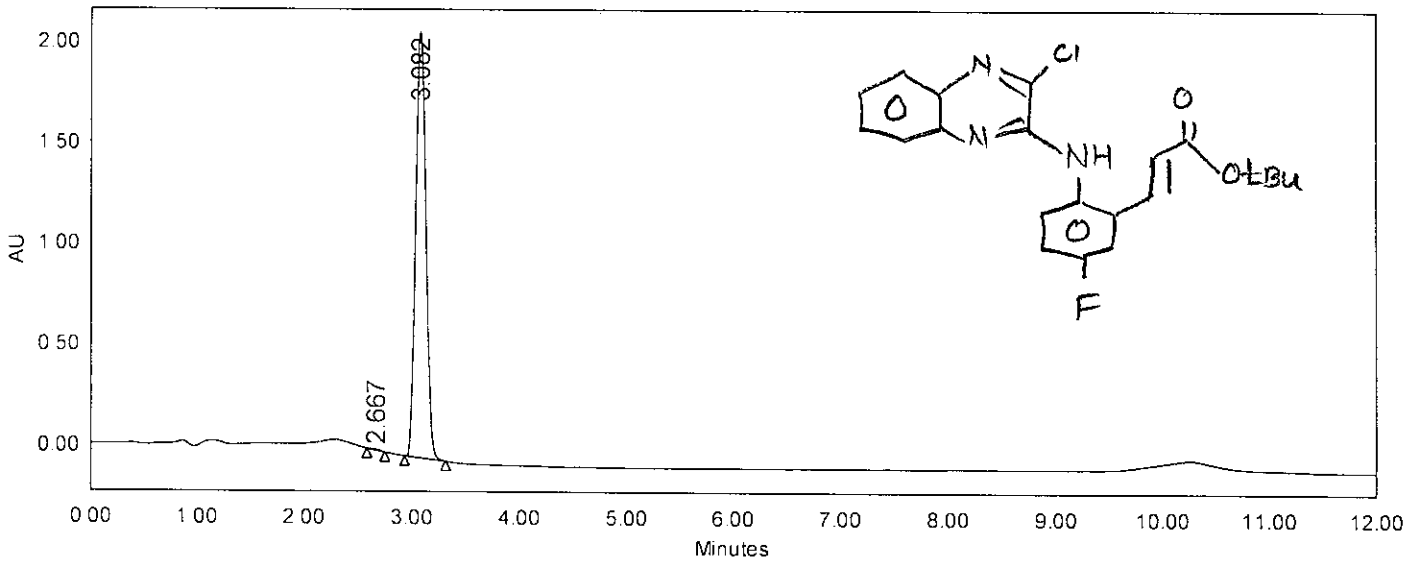

|   | RT    | Area     | % Area | Height  |
|---|-------|----------|--------|---------|
| 1 | 2.667 | 29378    | 0.21   | 5534    |
| 2 | 3.082 | 13888294 | 99.79  | 2129593 |

Analyzed By:

Checked By:

*Handwritten signature*  
4/30/15



**SAMPLE INFORMATION**

|                   |                          |                     |              |
|-------------------|--------------------------|---------------------|--------------|
| Sample Name:      | ILS-RAJ-O-CH3            | Sample Set Name:    | 300415       |
| AR Number:        | CM15D019                 | Acq. Method Set:    | MC           |
| Vial:             | 8                        | Processing Method:  | MC_PRO       |
| Injection #:      | 1                        | Channel Name:       | 220.0nm      |
| Injection Volume: | 4.00 ul                  | Proc. Chnl. Descr.: | PDA 220.0 nm |
| Run Time:         | 12.0 Minutes             |                     |              |
| Date Acquired:    | 4/30/2015 2:12:56 PM IST |                     |              |
| Date Processed:   | 4/30/2015 4:50:44 PM IST |                     |              |

Column: Symmetry C-18 75\*4.6mm 3.5µm  
 Mobile phase: A) 0.1% TFA in water B) ACN  
 T/%B: 0/20, 0.5/20, 2/95, 8/95, 10/20, 12/20  
 Flow: 1.0 ml /min, Diluent: ACN: WATER (90:10)

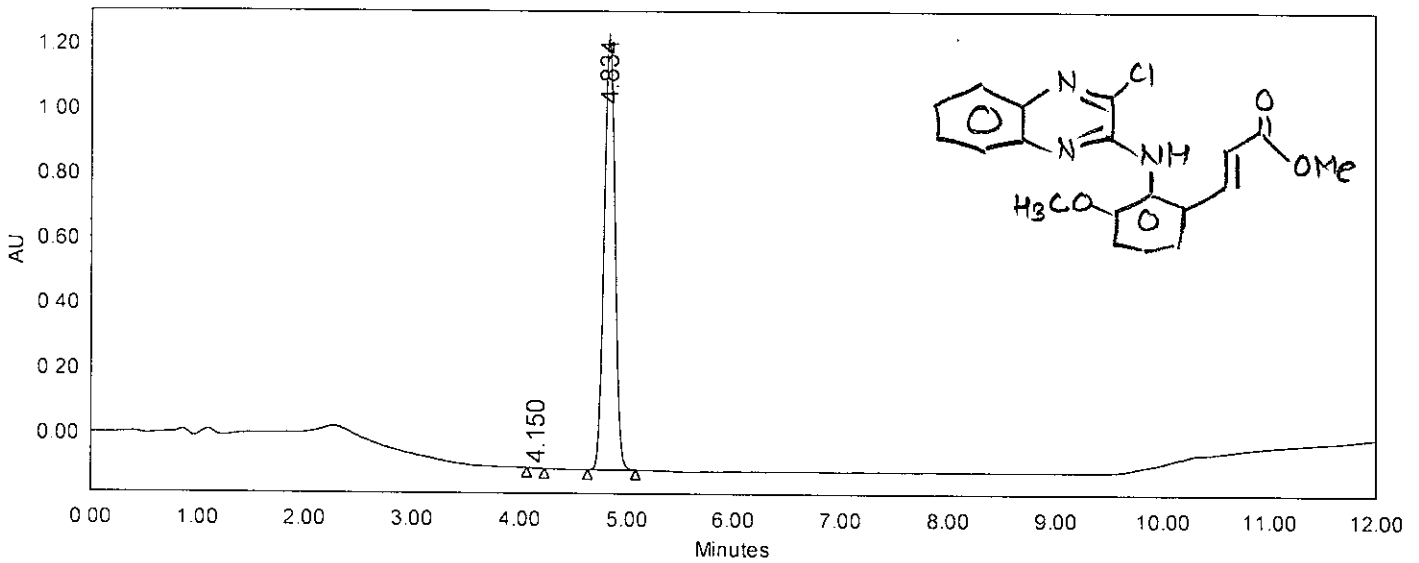

|   | RT    | Area    | % Area | Height  |
|---|-------|---------|--------|---------|
| 1 | 4.150 | 4173    | 0.04   | 751     |
| 2 | 4.834 | 9411670 | 99.96  | 1341008 |

Analyzed By:

Checked By:

*4/30/15*

**SAMPLE INFORMATION**

|                   |                          |                     |              |
|-------------------|--------------------------|---------------------|--------------|
| Sample Name:      | ILS-RAJ-AR               | Sample Set Name:    | 300415       |
| AR Number:        | CM15D018                 | Acq. Method Set:    | MC           |
| Vial:             | 7                        | Processing Method:  | MC_PRO       |
| Injection #:      | 1                        | Channel Name:       | 220.0nm      |
| Injection Volume: | 6.00 ul                  | Proc. Chnl. Descr.: | PDA 220.0 nm |
| Run Time:         | 12.0 Minutes             |                     |              |
| Date Acquired:    | 4/30/2015 1:58:11 PM IST |                     |              |
| Date Processed:   | 4/30/2015 4:50:34 PM IST |                     |              |

Column: Symmetry C-18 75\*4.6mm 3.5µm  
 Mobile phase: A) 0.1% TFA in water B) ACN  
 T/%B: 0/20, 0.5/20, 2/95, 8/95, 10/20, 12/20  
 Flow: 1.0 ml /min, Diluent: ACN: WATER (90:10)

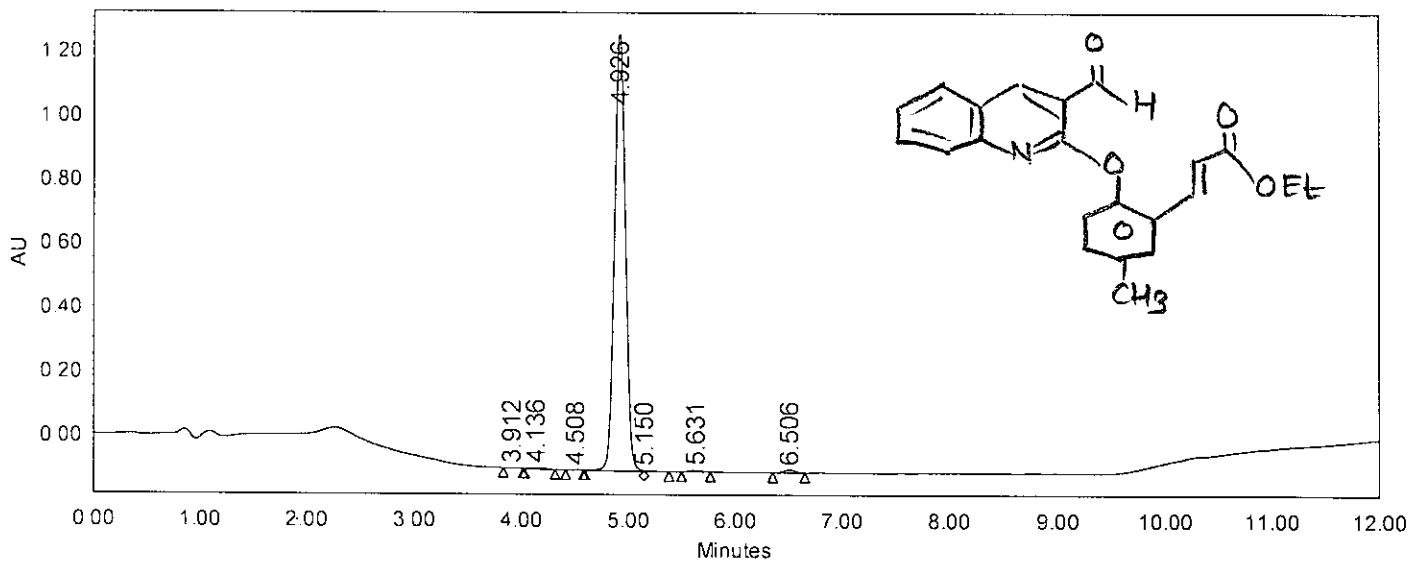

|   | RT    | Area    | % Area | Height  |
|---|-------|---------|--------|---------|
| 1 | 3.912 | 4099    | 0.04   | 612     |
| 2 | 4.136 | 39336   | 0.40   | 4512    |
| 3 | 4.508 | 5541    | 0.06   | 990     |
| 4 | 4.926 | 9687044 | 98.16  | 1370827 |
| 5 | 5.150 | 14850   | 0.15   | 2701    |
| 6 | 5.631 | 43818   | 0.44   | 6110    |
| 7 | 6.506 | 73567   | 0.75   | 9066    |

Analyzed By:

Checked By:

*Handwritten signature and date: 30/04/15*

**SAMPLE INFORMATION**

|                   |                           |                     |              |
|-------------------|---------------------------|---------------------|--------------|
| Sample Name:      | ILS-RAJ-S2-2F             | Acquired By:        | System       |
| A R Number:       | CM14K008                  | Sample Set Name:    | 241114       |
| Vial:             | 17                        | Acq. Method Set:    | MC           |
| Injection #:      | 1                         | Processing Method:  | MC PRO       |
| Injection Volume: | 5.00 ul                   | Channel Name:       | 260.0nm      |
| Run Time:         | 12.0 Minutes              | Proc. Chnl. Descr.: | PDA 260.0 nm |
| Date Acquired:    | 11/24/2014 2:46:09 PM IST |                     |              |
| Date Processed:   | 11/26/2014 3:46:11 PM IST |                     |              |

Column: Symmetry C-18 75\*4.6mm 3.5µm  
 Mobile phase: A) 0.1% TFA in water B) ACN  
 T/%B: 0/20, 0.5/20, 2/95, 8/95, 10/20, 12/20  
 Flow: 1.0 ml /min, Diluent: ACN: WATER (90:10)

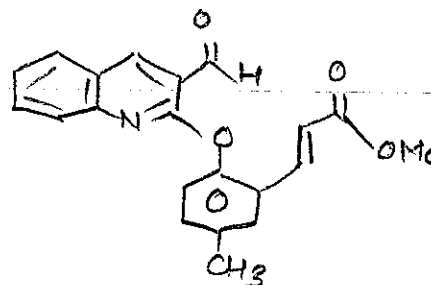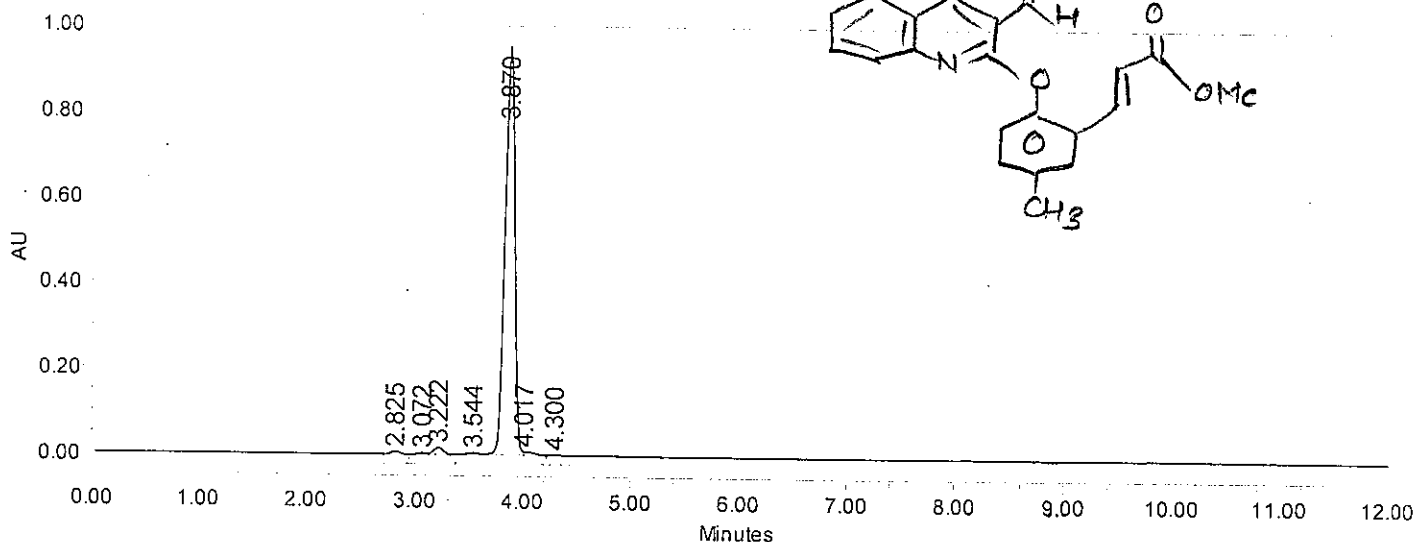

|   | RT    | Area    | % Area | Height |
|---|-------|---------|--------|--------|
| 1 | 2.825 | 41210   | 0.67   | 6857   |
| 2 | 3.072 | 19563   | 0.32   | 3219   |
| 3 | 3.222 | 97192   | 1.57   | 15991  |
| 4 | 3.544 | 29735   | 0.48   | 3906   |
| 5 | 3.870 | 5952079 | 96.10  | 944607 |
| 6 | 4.017 | 48893   | 0.79   | 7351   |
| 7 | 4.300 | 4652    | 0.08   | 878    |

*Handwritten signature*

Analysed By:

Checked By:

**SAMPLE INFORMATION**

Sample Name: ILS-RAJ-~~604~~-tBu  
 A R Number: CM14L018  
 Vial: 7  
 Injection #: 1  
 Injection Volume: 5.00 ul  
 Run Time: 12.0 Minutes

Sample Set Name: 020115  
 Acq. Method Set: MC  
 Processing Method: MC\_PRO  
 Channel Name: 260.0nm  
 Proc. Chnl. Descr.: PDA 260.0 nm

Date Acquired: 1/2/2015 5:07:43 PM IST  
 Date Processed: 1/2/2015 5:15:12 PM IST

Column: Symmetry C-18 75\*4.6mm 3.5µm  
 Mobile phase: A) 0.1% TFA in water B) ACN  
 T/%B: 0/20, 0.5/20, 2/95, 8/95, 10/20, 12/20  
 Flow: 1.0 ml/min, Diluent: ACN: WATER (90:10)

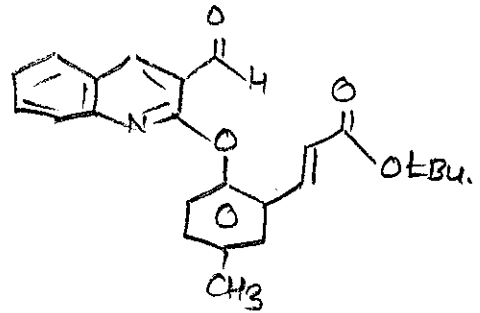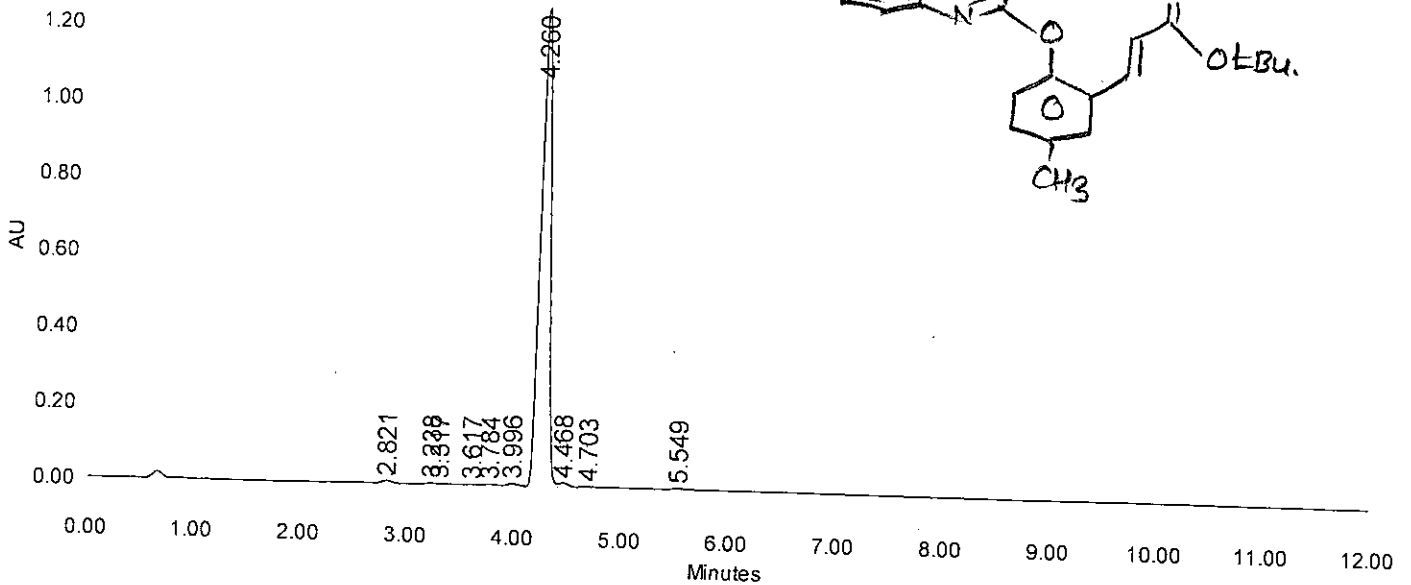

|   | RT    | Area    | % Area | Height  |
|---|-------|---------|--------|---------|
| 1 | 2.821 | 42204   | 0.53   | 7247    |
| 2 | 3.238 | 16163   | 0.20   | 2516    |
| 3 | 3.317 | 2665    | 0.03   | 932     |
| 4 | 3.617 | 635     | 0.01   | 168     |
| 5 | 3.784 | 6612    | 0.08   | 1006    |
| 6 | 3.996 | 29564   | 0.37   | 5104    |
| 7 | 4.260 | 7743188 | 97.64  | 1259739 |
| 8 | 4.468 | 58250   | 0.73   | 9952    |

|    | RT    | Area  | % Area | Height |
|----|-------|-------|--------|--------|
| 9  | 4.703 | 13480 | 0.17   | 2309   |
| 10 | 5.549 | 17222 | 0.22   | 2199   |

*05/01/15*

Analysed By:

Checked By:

### SAMPLE INFORMATION

|                                          |                                  |
|------------------------------------------|----------------------------------|
| Sample Name: ILS-RAJ-P-F-PIDA            | Sample Set Name: 300415          |
| AR Number: CM15D021                      | Acq. Method Set: MC              |
| Vial: 10                                 | Processing Method: MC_PRO        |
| Injection #: 1                           | Channel Name: 220.0nm            |
| Injection Volume: 6.00 ul                | Proc. Chnl. Descr.: PDA 220.0 nm |
| Run Time: 12.0 Minutes                   |                                  |
| Date Acquired: 4/30/2015 2:58:14 PM IST  |                                  |
| Date Processed: 4/30/2015 4:51:06 PM IST |                                  |

Column: Symmetry C-18 75\*4.6mm 3.5µm  
 Mobile phase: A) 0.1% TFA in water B) ACN  
 T/%B: 0/20, 0.5/20, 2/95, 8/95, 10/20, 12/20  
 Flow: 1.0 ml /min, Diluent: ACN: WATER (90:10)

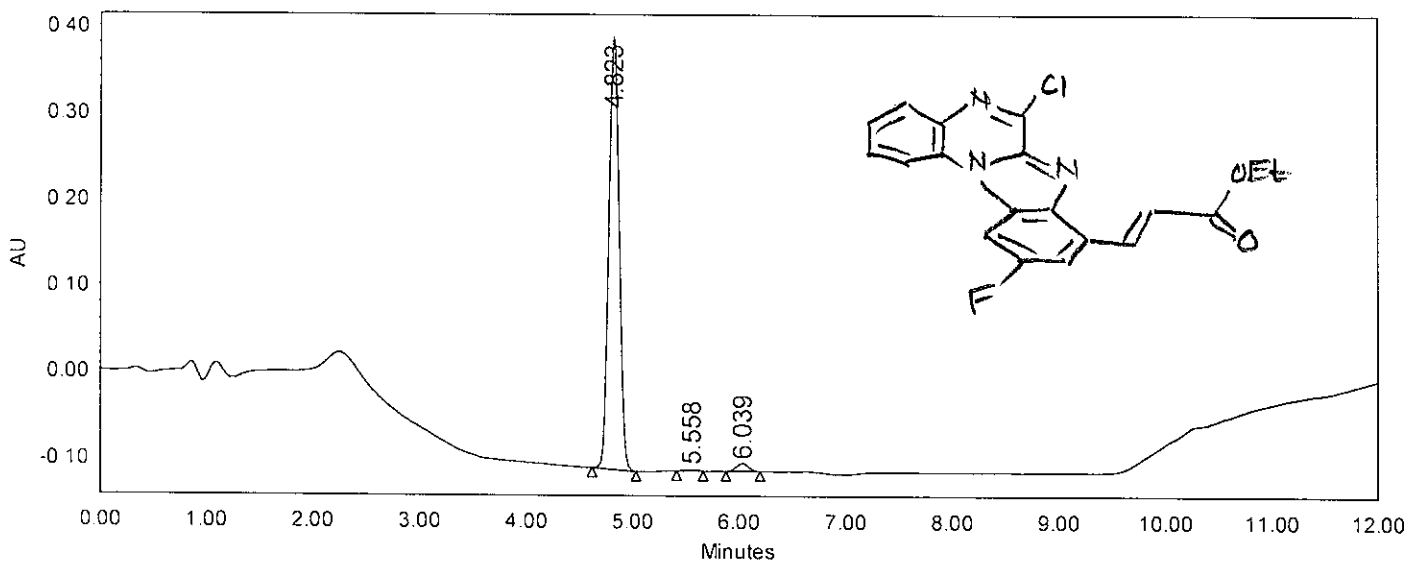

|   | RT    | Area    | % Area | Height |
|---|-------|---------|--------|--------|
| 1 | 4.823 | 3421820 | 97.49  | 502349 |
| 2 | 5.558 | 15521   | 0.44   | 1941   |
| 3 | 6.039 | 72615   | 2.07   | 9284   |

Analyzed By:

Checked By:

*Signature*  
30/04/15

**SAMPLE INFORMATION**

|                   |                          |                     |              |
|-------------------|--------------------------|---------------------|--------------|
| Sample Name:      | ILS-RAJ-N                | Sample Set Name:    | 130515_2     |
| Sample Type:      | CM15E009                 | Acq. Method Set:    | MC           |
| Vial:             | 17                       | Processing Method:  | MC PRO       |
| Injection #:      | 1                        | Channel Name:       | 220.0nm      |
| Injection Volume: | 1.20 ul                  | Proc. Chnl. Descr.: | PDA 220.0 nm |
| Run Time:         | 12.0 Minutes             |                     |              |
| Date Acquired:    | 5/13/2015 2:54:45 PM IST |                     |              |
| Date Processed:   | 5/13/2015 3:24:29 PM IST |                     |              |

Column: Symmetry C-18 75\*4.6mm 3.5µm  
 Mobile phase: A) 0.1% TFA in water B) ACN  
 T/%B: 0/20, 0.5/20, 2/95, 8/95, 10/20, 12/20  
 Flow: 1.0 ml /min, Diluent: ACN: WATER (90:10)

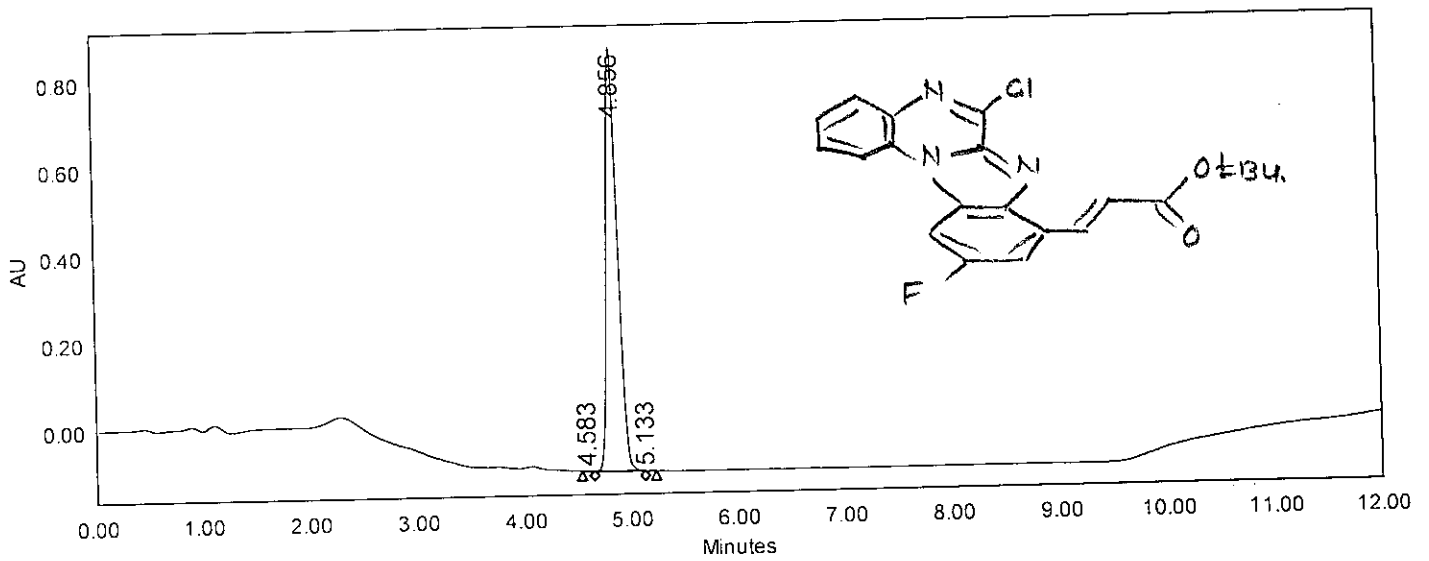

|   | RT    | Area    | % Area | Height |
|---|-------|---------|--------|--------|
| 1 | 4.583 | 1396    | 0.02   | 262    |
| 2 | 4.856 | 7230575 | 99.96  | 979920 |
| 3 | 5.133 | 1746    | 0.02   | 686    |

Analyzed By:  
*Ref* 13/05/15

Checked By:

**SAMPLE INFORMATION**

|                   |                          |                     |              |
|-------------------|--------------------------|---------------------|--------------|
| Sample Name:      | ILS-RAJ-PIDA-4P          | Sample Set Name:    | 130515_2     |
| Sample Type:      | CM15E008                 | Acq. Method Set:    | MC           |
| Vial:             | 16                       | Processing Method:  | MC_PRO       |
| Injection #:      | 1                        | Channel Name:       | 220.0nm@1    |
| Injection Volume: | 1.50 ul                  | Proc. Chnl. Descr.: | PDA 220.0 nm |
| Run Time:         | 12.0 Minutes             |                     |              |
| Date Acquired:    | 5/13/2015 2:39:49 PM IST |                     |              |
| Date Processed:   | 5/13/2015 3:24:16 PM IST |                     |              |

Column: Symmetry C-18 75\*4.6mm 3.5µm  
 Mobile phase: A) 0.1% TFA in water B) ACN  
 T/%B: 0/20, 0.5/20, 2/95, 8/95, 10/20, 12/20  
 Flow: 1.0 ml /min, Diluent: ACN: WATER (90:10)

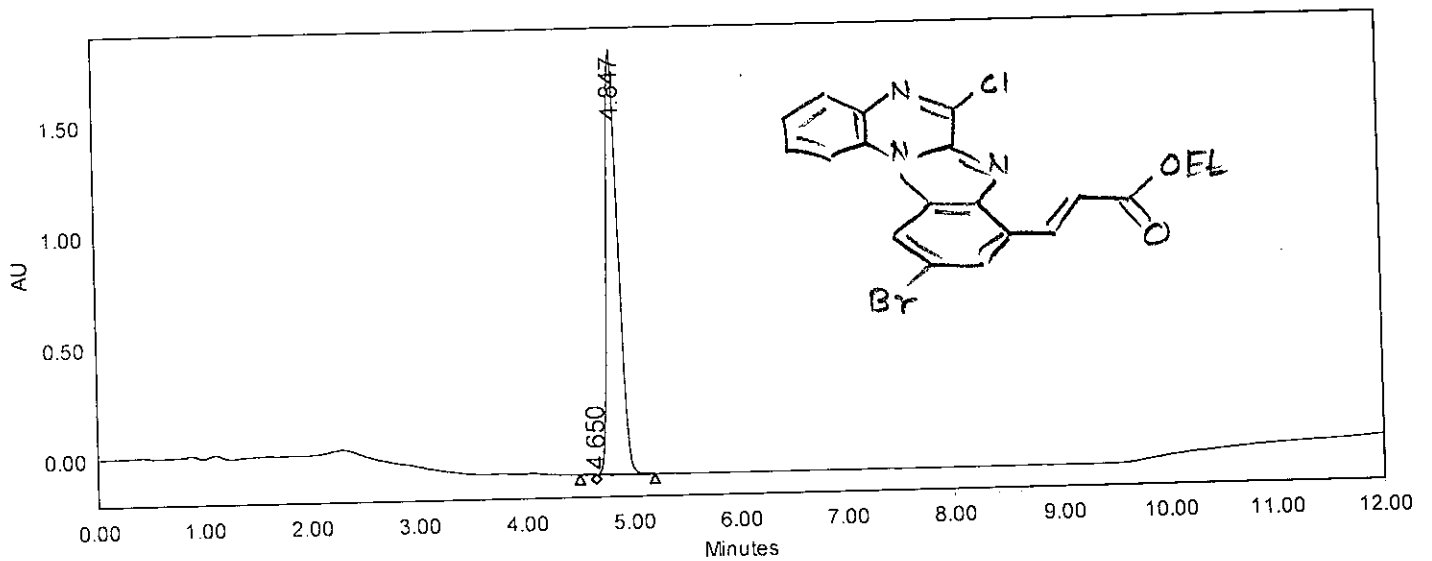

|   | RT    | Area     | % Area | Height  |
|---|-------|----------|--------|---------|
| 1 | 4.650 | 5609     | 0.04   | 975     |
| 2 | 4.847 | 14561299 | 99.96  | 1910323 |

Analyzed By:

Checked By:

*Handwritten signature*  
13/05/15

SAMPLE INFORMATION

|                   |                          |                     |              |
|-------------------|--------------------------|---------------------|--------------|
| Sample Name:      | ILS-RAJ-PIDA-2           | Sample Set Name:    | 130515_2     |
| Sample Type:      | CM15E010                 | Acq. Method Set:    | MC           |
| Vial:             | 18                       | Processing Method:  | MC PRO       |
| Injection #:      | 1                        | Channel Name:       | 220.0nm      |
| Injection Volume: | 1.20 ul                  | Proc. Chnl. Descr.: | PDA 220.0 nm |
| Run Time:         | 12.0 Minutes             |                     |              |
| Date Acquired:    | 5/13/2015 3:09:28 PM IST |                     |              |
| Date Processed:   | 5/13/2015 3:25:30 PM IST |                     |              |

Column: Symmetry C-18 75\*4.6mm 3.5µm  
 Mobile phase: A) 0.1% TFA in water B) ACN  
 T1%B: 0/20, 0.5/20, 2/95, 8/95, 10/20, 12/20  
 Flow: 1.0 ml /min, Diluent: ACN: WATER (90:10)

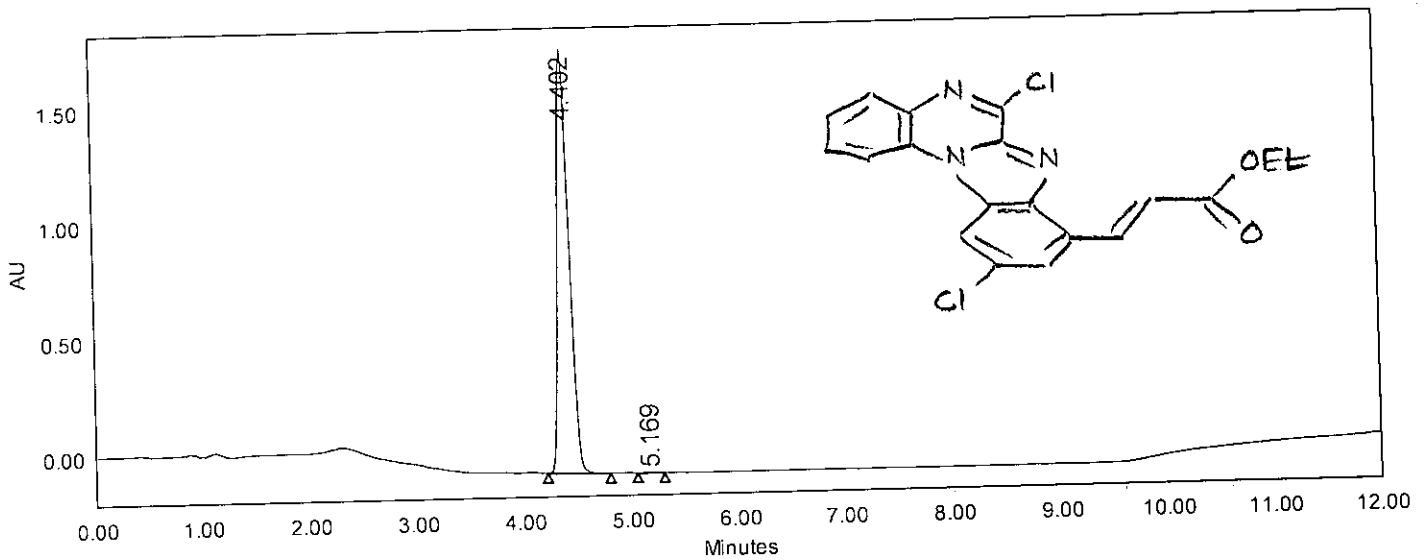

|   | RT    | Area     | % Area | Height  |
|---|-------|----------|--------|---------|
| 1 | 4.402 | 13577888 | 99.86  | 1837954 |
| 2 | 5.169 | 18676    | 0.14   | 2752    |

Analyzed By:

Checked By:

*Def 13/05/15*
